# Supplementary material for: Enantioselective palladium-catalyzed diarylation of unactivated alkenes
Source: Royal Society of Chemistry journal article supplement (doi:10.1039/c9cc07036b), 2019-01-01
Supplement: c9cc07036b1.pdf [file c9cc07036b1.pdf]

**Supporting information**

**Enantioselective Palladium-Catalyzed  
Diarylation of Unactivated Alkenes**

Baihang Ju, Shigui Chen\* and Wangqing Kong\*

E-mail: [wqkong@whu.edu.cn](mailto:wqkong@whu.edu.cn)

The Center for Precision Synthesis, Institute for Advanced Studies, Wuhan

University, 299 Bayi Road, Wuhan, Hubei 430072, P. R. China

# Contents

|                                                                                 |      |
|---------------------------------------------------------------------------------|------|
| 1. General information                                                          | S3   |
| 2. General procedure                                                            | S4   |
| 3. Characterization data of products                                            | S5   |
| 4. Copies of the $^1\text{H}$ , $^{19}\text{F}$ and $^{13}\text{C}$ NMR spectra | S65  |
| 5. References                                                                   | S100 |

## 1. General Information

$^1\text{H}$  and  $^{13}\text{C}$  NMR data were recorded with Bruker ADVANCE III (400 MHz) or JNM-ECZ400S/L1 (400 MHz) spectrometers. Chemical shifts are given in ppm. The spectra are calibrated to the residual  $^1\text{H}$  and  $^{13}\text{C}$  signals of the solvents. Multiplicities are abbreviated as follows: singlet (s), doublet (d), triplet (t), quartet (q), doublet-doublet (dd), quintet (quint), septet (sept), multiplet (m), and broad (b).  $^{19}\text{F}$  NMR spectra were recorded using  $\text{CFCl}_3$  as internal standard. Gas chromatography were determined with a SHIMADZU Nexis GC 2030 gas chromatography instrument with a FID detector. High-resolution mass spectra (HRMS) were recorded on DIONEX UltiMate 3000 & Bruker Compact TOF mass spectrometer. Enantiomeric excesses were determined with a SHIMADZU LC-20ADXR system using chiral stationary phase columns (DAICEL) by comparing the samples with the corresponding racemic samples. Column and elution details were specified in each entry.

**Materials and Methods:** Unless otherwise stated, starting materials were purchased from commercial suppliers (Adamas-beta®, Alfa, Aldrich and so on). All reactions dealing with air- or moisture-sensitive compounds were performed in the argon-filled glove box or by standard Schlenk techniques in oven-dried reaction vessels under argon atmosphere. Solvents were purchased in HPLC quality, degassed by purging thoroughly with argon and dried over activated molecular sieves of appropriate size. More sensitive compounds were stored in a desiccator or in a glove-box if required. Reactions were monitored by thin layer chromatography (TLC) using glass 0.25 mm silica gel plates. Compounds were visualized by UV-light at 254 nm and by dipping the plates in an aqueous potassium permanganate solution followed by heating. Flash column chromatography was performed over silica gel (200-400 mesh).

## 2. General Procedures

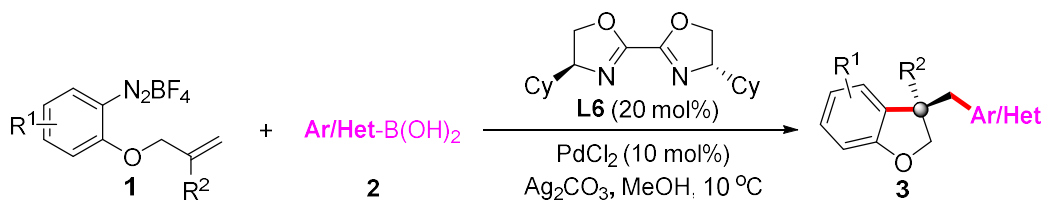

A mixture of  $PdCl_2$  (10 mol %), (4*S*, 4'*S*)-Cy-BOX **L6** (20 mol %) and MeOH (1.0 mL) was stirred in an oven-dried vial at room temperature for 15 minutes to form the precatalyst. The resulting solution was cooled to 10 °C and charged with arenediazonium salt **1** (0.10 mmol), boronic acid **2** (0.2 mmol) and  $Ag_2CO_3$  (0.1 mmol). Then the reaction mixture was stirred at the same temperature until the reaction was completed. The solvent was removed under vacuum and the residue was then purified by column chromatography on silica gel, eluting with petroleum ether/EtOAc = 100:1~30:1 to afford the desired dihydrobenzofuran **3**.



### 3. Characterization data of products

(*R*)-3-benzyl-3-methyl-2,3-dihydrobenzofuran (**3aa**)

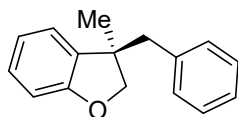

Chemical Formula: C<sub>16</sub>H<sub>16</sub>O

Exact Mass: 224.1201

**3aa** was prepared according to general procedure using **1a** and **2a** and was purified by silica gel column chromatography (petroleum ether/EtOAc = 100/1~50/1) to obtain **3aa** as colorless oil (85% yield). The <sup>1</sup>H NMR data matched those reported in the literature<sup>1</sup>: <sup>1</sup>H NMR (400 MHz, CDCl<sub>3</sub>): δ 7.31-7.20 (m, 3H), 7.13 (ddd, *J* = 7.9, 7.3, 1.5 Hz, 1H), 7.00 (dd, *J* = 7.3, 2.2 Hz, 2H), 6.94 (dd, *J* = 7.4, 1.6 Hz, 1H), 6.86 (td, *J* = 7.4, 0.9 Hz, 1H), 6.80-6.74 (m, 1H), 4.50 (d, *J* = 8.7 Hz, 1H), 4.06 (d, *J* = 8.8 Hz, 1H), 3.15-2.78 (m, 2H), 1.36 (s, 3H);

<sup>13</sup>C NMR (101 MHz, CDCl<sub>3</sub>): δ 159.5, 137.5, 134.8, 130.3, 128.2, 127.9, 126.4, 123.3, 120.3, 109.7, 81.9, 46.6, 46.2, 24.6.

The enantiomeric purity was established by HPLC analysis using a chiral column: IA-H column, 30 °C, *n*-Hexane/*i*-Propanol = 98.8/0.2 as eluent, 254 nm, 0.75 mL/min. t<sub>R</sub> = 15 min (major), 22 min (minor).

Optical Rotation: [α]<sub>D</sub><sup>20</sup> -13.4 (c 0.75, CHCl<sub>3</sub>) for 94% ee.

#### Determination of Absolute Configuration:

We assigned the absolute stereochemistry of the aryl-alkenylation product **3aa** via chemical correlation with the corresponding known enantiomer reported by the Brown and Correia's group;<sup>1</sup> Both the HPLC analysis using the same conditions and the specific rotation indicated the *R* absolute stereochemistry. All other dihydrobenzofurans **3** were attributed accordingly.

<色谱图>

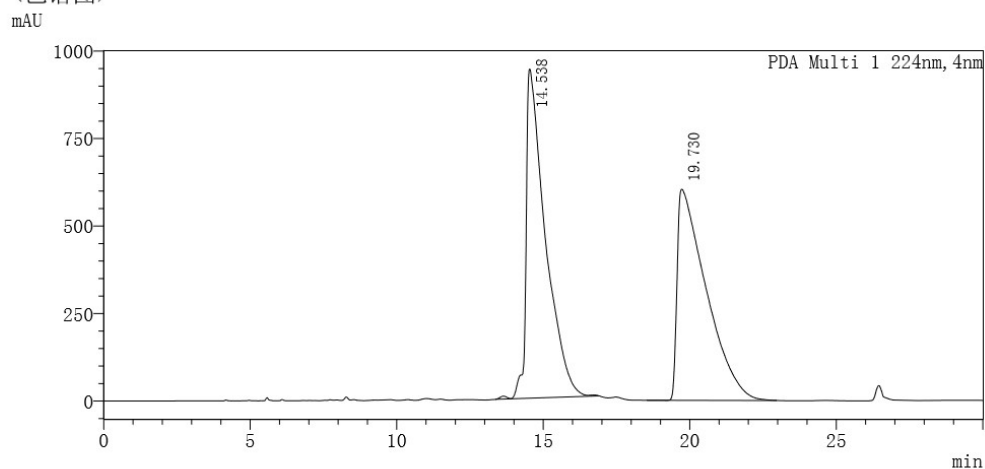

<峰表>

PDA Ch1 224nm

| 峰号 | 保留时间   | 面积       | 高度      | 浓度    | 浓度单位 | 标记 | 化合物名 |
|----|--------|----------|---------|-------|------|----|------|
| 1  | 14.538 | 42888801 | 940751  | 0.000 |      | M  |      |
| 2  | 19.730 | 41606477 | 603210  | 0.000 |      | M  |      |
| 总计 |        | 84495277 | 1543961 |       |      |    |      |

peak number

area

height

retention time

<色谱图>

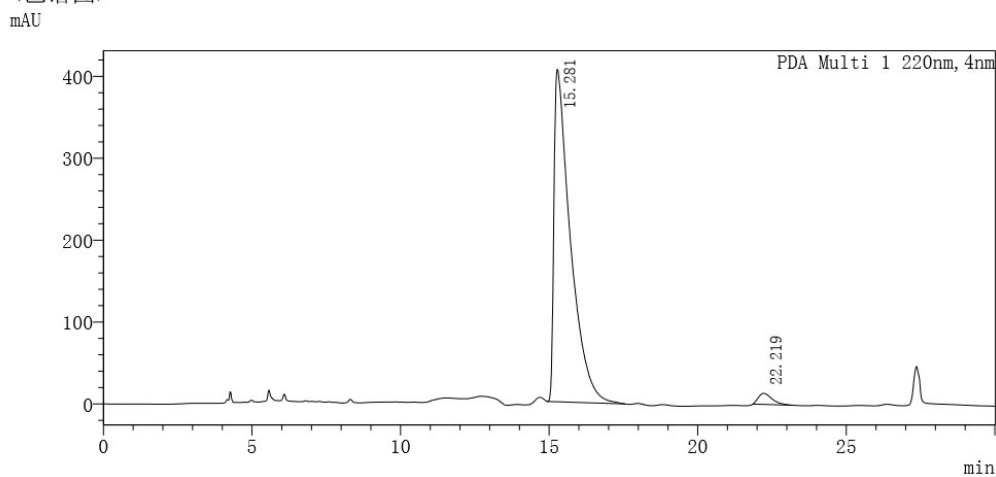

<峰表>

PDA Ch1 220nm

| 峰号 | 保留时间   | 面积       | 高度     | 浓度    | 浓度单位 | 标记 | 化合物名 |
|----|--------|----------|--------|-------|------|----|------|
| 1  | 15.281 | 15608551 | 405948 | 0.000 |      | M  |      |
| 2  | 22.219 | 433739   | 13501  | 0.000 |      | M  |      |
| 总计 |        | 16042290 | 419449 |       |      |    |      |

peak number

area

height

retention time

(*R*)-3-([1,1'-biphenyl]-4-ylmethyl)-3-methyl-2,3-dihydrobenzofuran (**3ab**)

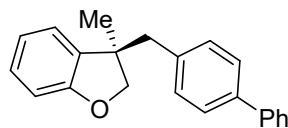

Chemical Formula: C<sub>22</sub>H<sub>20</sub>O

Exact Mass: 300.1514

**3ab** was prepared according to general procedure using **1a** and **2b** and was purified by silica gel column chromatography (petroleum ether/EtOAc = 100/1~50/1) to obtain **3ab** as colorless oil (82% yield). <sup>1</sup>H NMR (400 MHz, CDCl<sub>3</sub>): δ 7.66-7.58 (m, 2H), 7.54-7.42 (m, 4H), 7.39-7.32 (m, 1H), 7.17 (td, *J* = 7.6, 1.4 Hz, 1H), 7.12-7.06 (m, 2H), 7.00 (dd, *J* = 7.4, 1.4 Hz, 1H), 6.90 (td, *J* = 7.4, 1.0 Hz, 1H), 6.81 (ddd, *J* = 8.1, 1.0, 0.5 Hz, 1H), 4.56 (d, *J* = 8.7 Hz, 1H), 4.12 (d, *J* = 8.7 Hz, 1H), 2.97 (d, *J* = 13.2 Hz, 1H), 2.92 (d, *J* = 13.2 Hz, 1H), 1.41 (s, 3H);

<sup>13</sup>C NMR (101 MHz, CDCl<sub>3</sub>): δ 159.5, 140.8, 139.3, 136.7, 134.8, 130.8, 128.7, 128.2, 127.1, 127.0, 126.6, 123.4, 120.3, 109.7, 81.9, 46.3, 46.2, 24.6;

HRMS: (ESI) calcd for C<sub>22</sub>H<sub>20</sub>NaO<sup>+</sup>[M+Na]<sup>+</sup> 232.1406; found 323.1406.

The enantiomeric purity was established by HPLC analysis using a chiral column: OJ-H column, 30 °C, *n*-Hexane/*i*-Propanol = 85/15 as eluent, 254 nm, 1 mL/min. t<sub>R</sub> = 11.1 min (major), 12.1 min (minor).

Optical Rotation: [α]<sub>D</sub><sup>30</sup> -31.2 (c 0.58, CHCl<sub>3</sub>) for 95% ee.

Absolute stereochemistry was determined through analogy with **3aa**.

＜色谱图＞

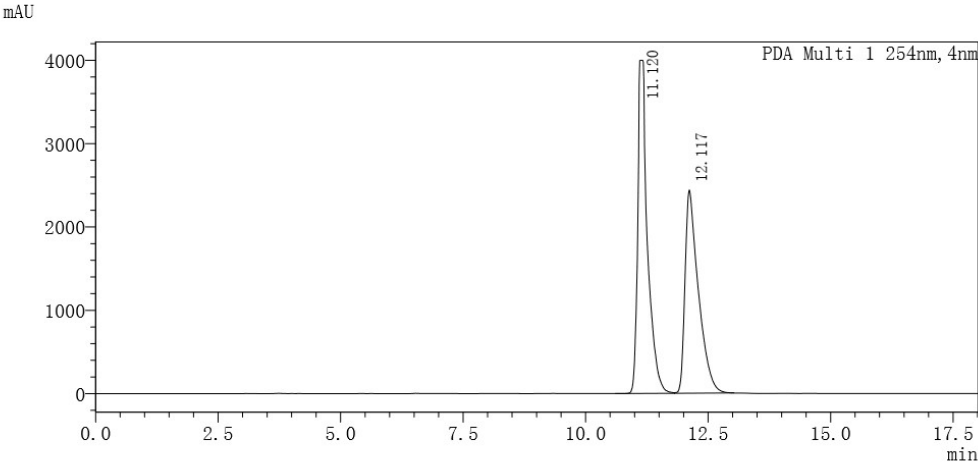

＜峰表＞

PDA Ch1 254nm

| 峰号 | 保留时间   | 面积        | 高度      | 浓度    | 浓度单位 | 标记  | 化合物名 |
|----|--------|-----------|---------|-------|------|-----|------|
| 1  | 11.120 | 55192437  | 3997685 | 0.000 |      | M   |      |
| 2  | 12.117 | 46082408  | 2440031 | 0.000 |      | V M |      |
| 总计 |        | 101274844 | 6437717 |       |      |     |      |

peak number

retention time

area

height

＜色谱图＞

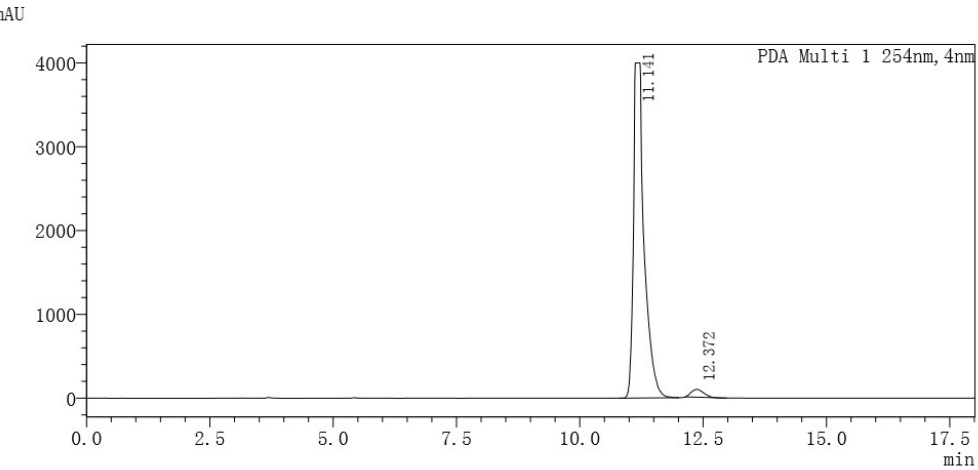

＜峰表＞

PDA Ch1 254nm

| 峰号 | 保留时间   | 面积       | 高度      | 浓度    | 浓度单位 | 标记 | 化合物名 |
|----|--------|----------|---------|-------|------|----|------|
| 1  | 11.141 | 60571711 | 3999165 | 0.000 |      | M  |      |
| 2  | 12.372 | 1625010  | 94571   | 0.000 |      | M  |      |
| 总计 |        | 62196721 | 4093736 |       |      |    |      |

peak number

retention time

area

height

(*R*)-3-(4-(tert-butyl)benzyl)-3-methyl-2,3-dihydrobenzofuran (**3ac**)

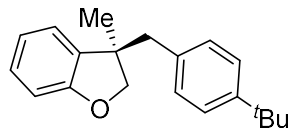

Chemical Formula: C<sub>20</sub>H<sub>24</sub>O

Exact Mass: 280.1827

**3ac** was prepared according to general procedure using **1a** and **2c** and was purified by silica gel column chromatography (petroleum ether/EtOAc = 100/1~50/1) to obtain **3ac** as colorless oil (79% yield). <sup>1</sup>H NMR (400 MHz, CDCl<sub>3</sub>): δ 7.30-7.26 (m, 2H), 7.18-7.12 (m, 1H), 7.03-6.95 (m, 3H), 6.88 (td, *J* = 7.4, 1.0 Hz, 1H), 6.79 (dt, *J* = 7.9, 0.8 Hz, 1H), 4.53 (d, *J* = 8.7 Hz, 1H), 4.06 (d, *J* = 8.7 Hz, 1H), 2.90 (d, *J* = 13.2 Hz, 1H), 2.84 (d, *J* = 13.2 Hz, 1H), 1.36 (s, 3H), 1.32 (s, 9H);

<sup>13</sup>C NMR (101 MHz, CDCl<sub>3</sub>): δ 159.5, 149.3, 135.3, 134.5, 130.0, 128.1, 124.9, 123.3, 120.3, 109.7, 81.8, 46.2, 45.9, 34.4, 31.4, 24.7;

HRMS: (ESI) calcd for C<sub>20</sub>H<sub>24</sub>NaO<sup>+</sup>[M+Na]<sup>+</sup> 303.1719; found 303.1714.

The enantiomeric purity was established by HPLC analysis using a chiral column: IA-H column, 30 °C, *n*-Hexane as eluent, 254 nm, 0.75 mL/min. t<sub>R</sub> = 12.8 min (major), 14.0 min (minor).

Optical Rotation: [α]<sub>D</sub><sup>30</sup> -25.4 (c 0.35, CHCl<sub>3</sub>) for 99% ee.

Absolute stereochemistry was determined through analogy with **3aa**.

<色谱图>

mAU

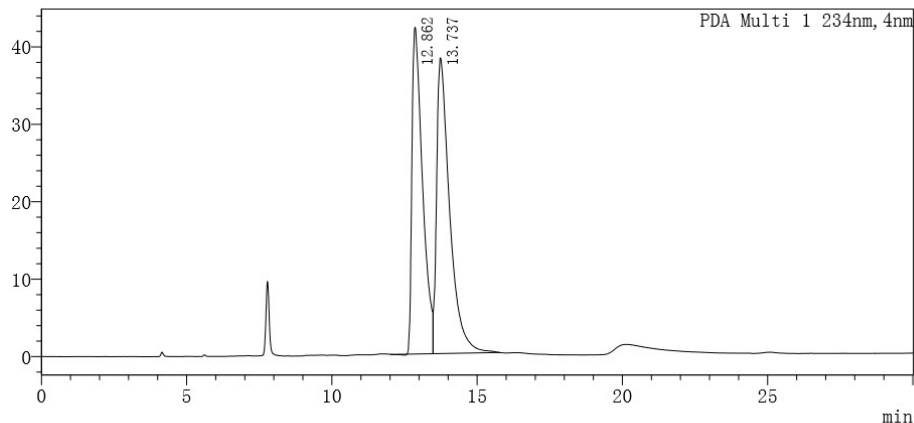

<峰表>

PDA Ch1 234nm

| 峰号 | 保留时间   | 面积      | 高度    | 浓度    | 浓度单位 | 标记  | 化合物名 |
|----|--------|---------|-------|-------|------|-----|------|
| 1  | 12.862 | 1067928 | 42203 | 0.000 |      | M   |      |
| 2  | 13.737 | 1189800 | 38195 | 0.000 |      | V M |      |
| 总计 |        | 2257728 | 80398 |       |      |     |      |

peak number

area

height

retention time

<色谱图>

mAU

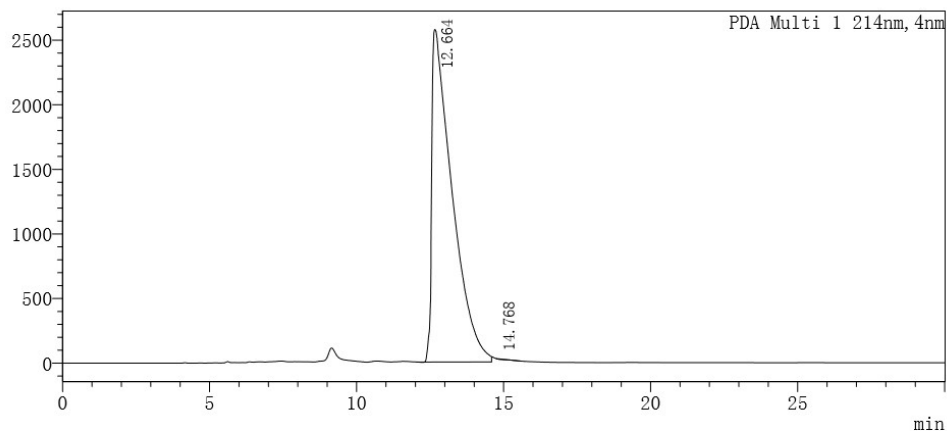

<峰表>

PDA Ch1 214nm

| 峰号 | 保留时间   | 面积        | 高度      | 浓度    | 浓度单位 | 标记 | 化合物名 |
|----|--------|-----------|---------|-------|------|----|------|
| 1  | 12.664 | 123421424 | 2574686 | 0.000 |      | M  |      |
| 2  | 14.768 | -67884    | -356    | 0.000 |      | M  |      |
| 总计 |        | 123353540 | 2574329 |       |      |    |      |

peak number

area

height

retention time

(*R*)-3-(4-bromobenzyl)-3-methyl-2,3-dihydrobenzofuran (**3ad**)

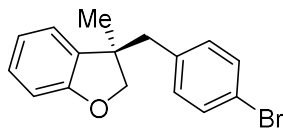

Chemical Formula: C<sub>16</sub>H<sub>15</sub>BrO

Exact Mass: 302.0306

**3ad** was prepared according to general procedure using **1a** and **2d** and was purified by silica gel column chromatography (petroleum ether/EtOAc = 100/1~50/1) to obtain **3ad** as colorless oil (63% yield). The <sup>1</sup>H NMR data matched those reported in the literature<sup>2</sup>: <sup>1</sup>H NMR (400 MHz, CDCl<sub>3</sub>): δ 7.42-7.31 (m, 2H), 7.14 (ddd, *J* = 8.0, 7.1, 1.7 Hz, 1H), 6.97-6.80 (m, 4H), 6.76 (dt, *J* = 8.0, 0.8 Hz, 1H), 4.45 (d, *J* = 8.8 Hz, 1H), 4.08 (d, *J* = 8.7 Hz, 1H), 2.83 (d, *J* = 2.9 Hz, 2H), 1.36 (s, 3H);

<sup>13</sup>C NMR (101 MHz, CDCl<sub>3</sub>): δ 159.5, 136.5, 134.1, 132.0, 131.0, 128.3, 123.3, 120.5, 120.3, 109.8, 81.8, 46.1, 24.4.

The enantiomeric purity was established by HPLC analysis using a chiral column: AD-H column, 30 °C, *n*-Hexane/*i*-Propanol = 97/3 as eluent, 254 nm, 1 mL/min. t<sub>R</sub> = 4.3 min (minor), 4.6 min (major).

Optical Rotation: [α]<sub>D</sub><sup>28</sup> -30.2 (c 0.5, CHCl<sub>3</sub>) for 93% ee.

Absolute stereochemistry was determined through analogy with **3aa**.

<色谱图>

mAU

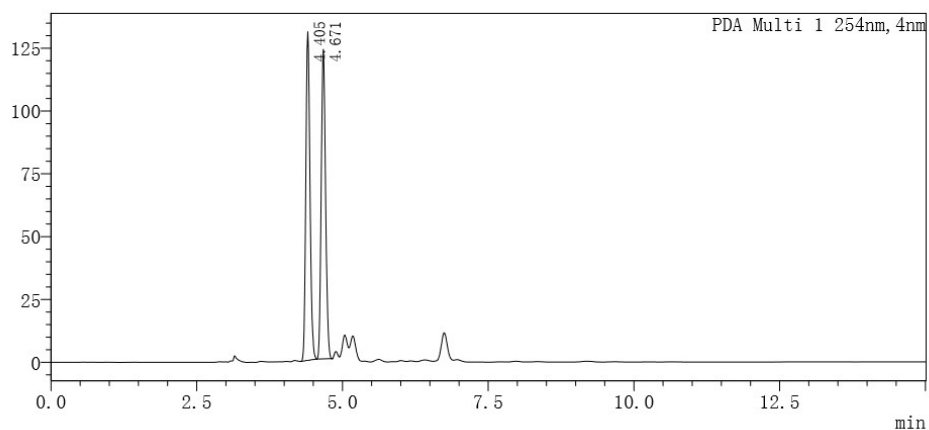

<峰表>

PDA Ch1 254nm

| 峰号 | 保留时间  | 面积      | 高度     | 浓度    | 浓度单位 | 标记 | 化合物名 |
|----|-------|---------|--------|-------|------|----|------|
| 1  | 4.405 | 645724  | 130826 | 0.000 |      | M  |      |
| 2  | 4.671 | 636255  | 123208 | 0.000 |      | M  |      |
| 总计 |       | 1281979 | 254033 |       |      |    |      |

peak number

area

height

retention time

<色谱图>

mAU

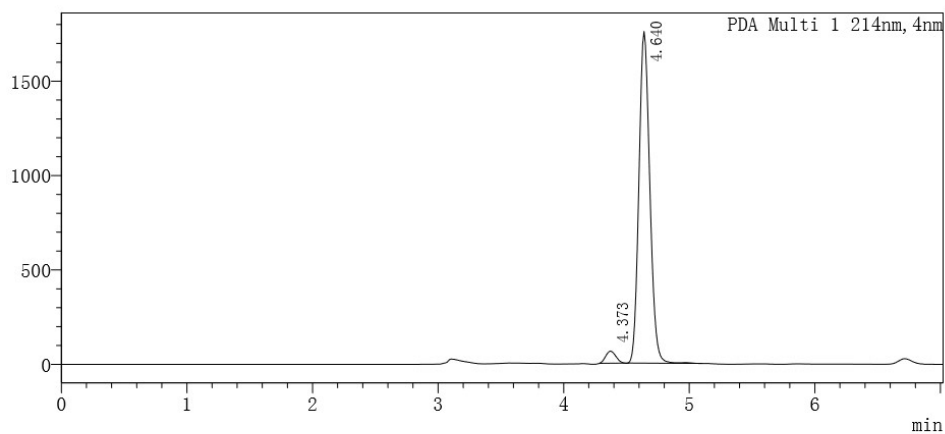

<峰表>

PDA Ch1 214nm

| 峰号 | 保留时间  | 面积       | 高度      | 浓度    | 浓度单位 | 标记 | 化合物名 |
|----|-------|----------|---------|-------|------|----|------|
| 1  | 4.373 | 358654   | 64125   | 0.000 |      | M  |      |
| 2  | 4.640 | 10541151 | 1757391 | 0.000 |      | M  |      |
| 总计 |       | 10899806 | 1821517 |       |      |    |      |

peak number

area

height

retention time



(*R*)-3-(4-fluorobenzyl)-3-methyl-2,3-dihydrobenzofuran (**3ae**)

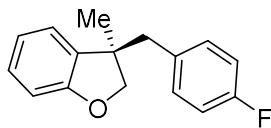

Chemical Formula: C<sub>16</sub>H<sub>15</sub>FO

Exact Mass: 242.1107

**3ae** was prepared according to general procedure using **1a** and **2e** and was purified by silica gel column chromatography (petroleum ether/EtOAc = 100/1~50/1) to obtain **3ae** as colorless oil (72% yield). The <sup>1</sup>H NMR data matched those reported in the literature<sup>1</sup>: <sup>1</sup>H NMR (400 MHz, CDCl<sub>3</sub>): δ 7.14 (ddd, *J* = 8.0, 7.2, 1.6 Hz, 1H), 6.92 (d, *J* = 7.1 Hz, 5H), 6.86 (td, *J* = 7.3, 1.0 Hz, 1H), 6.76 (dt, *J* = 8.0, 0.8 Hz, 1H), 4.47 (d, *J* = 8.7 Hz, 1H), 4.08 (d, *J* = 8.7 Hz, 1H), 2.87 (d, *J* = 13.2 Hz, 1H), 2.84 (d, *J* = 13.2 Hz, 1H), 1.37 (s, 3H);

<sup>13</sup>C NMR (101 MHz, CDCl<sub>3</sub>): δ 161.8 (d, *J* = 244.5 Hz), 159.6, 134.3, 133.2 (d, *J* = 3.4 Hz), 131.7 (d, *J* = 7.9 Hz), 128.3, 123.3, 120.3, 114.7 (d, *J* = 21.1 Hz), 109.7, 81.8, 46.2, 45.9, 24.5;

<sup>19</sup>F NMR (376 MHz, CDCl<sub>3</sub>): δ -116.58;

The enantiomeric purity was established by HPLC analysis using a chiral column: OD-H column, 30 °C, *n*-Hexane/*i*-Propanol = 99.5/0.5 as eluent, 254 nm, 0.5 mL/min. tR = 11.8 min (major), 12.4 min (minor).

Optical Rotation: [α]<sub>D</sub><sup>30</sup> -29.0 (c 0.23, CHCl<sub>3</sub>) for 94% ee.

Absolute stereochemistry was determined through analogy with **3aa**.

<色谱图>

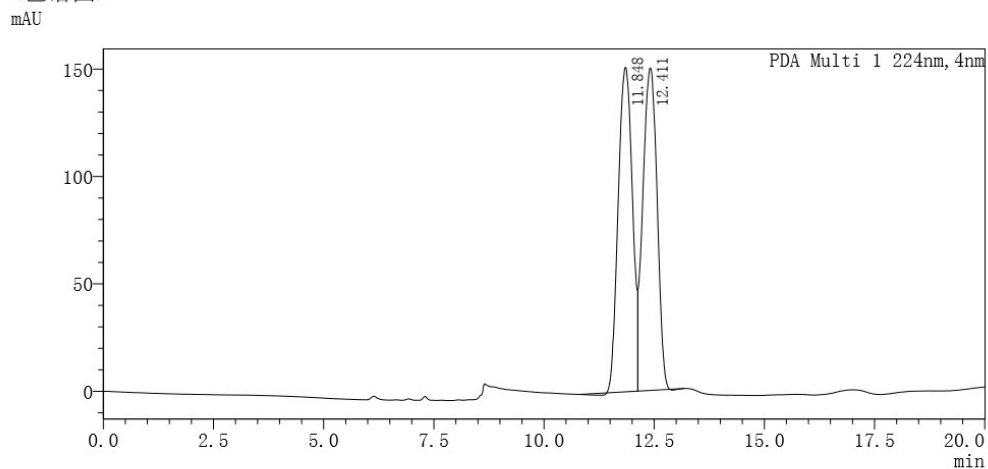

<峰表>

PDA Ch1 224nm

| 峰号 | 保留时间   | 面积      | 高度     | 浓度    | 浓度单位 | 标记  | 化合物名 |
|----|--------|---------|--------|-------|------|-----|------|
| 1  | 11.848 | 3394603 | 151066 | 0.000 |      | M   |      |
| 2  | 12.411 | 3369248 | 150098 | 0.000 |      | V M |      |
| 总计 |        | 6763851 | 301164 |       |      |     |      |

peak number

area

height

retention time

<色谱图>

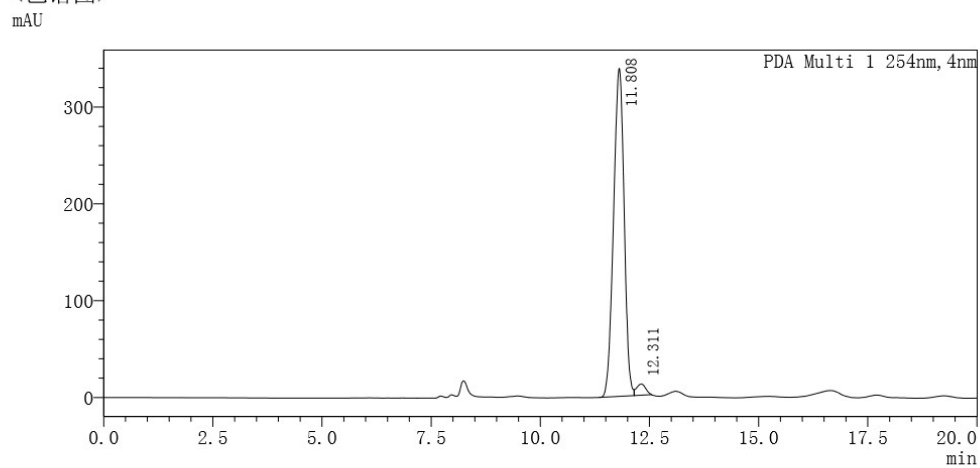

<峰表>

PDA Ch1 254nm

| 峰号 | 保留时间   | 面积      | 高度     | 浓度    | 浓度单位 | 标记  | 化合物名 |
|----|--------|---------|--------|-------|------|-----|------|
| 1  | 11.808 | 5704432 | 338790 | 0.000 |      | M   |      |
| 2  | 12.311 | 167112  | 11572  | 0.000 |      | V M |      |
| 总计 |        | 5871544 | 350362 |       |      |     |      |

peak number

area

height

retention time

(*R*)-3-methyl-3-(4-(trifluoromethoxy)benzyl)-2,3-dihydrobenzofuran (**3af**)

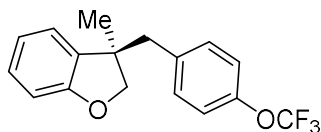

Chemical Formula: C<sub>17</sub>H<sub>15</sub>F<sub>3</sub>O<sub>2</sub>

Exact Mass: 308.1024

**3af** was prepared according to general procedure using **1a** and **2f** and was purified by silica gel column chromatography (petroleum ether/EtOAc = 100/1~50/1) to obtain **3af** as colorless oil (72% yield). <sup>1</sup>H NMR (400 MHz, CDCl<sub>3</sub>): δ 7.18-7.11 (m, 1H), 7.11-7.05 (m, 2H), 7.01-6.95 (m, 2H), 6.94-6.83 (m, 2H), 6.80-6.73 (m, 1H), 4.47 (d, *J* = 8.7 Hz, 1H), 4.09 (d, *J* = 8.8 Hz, 1H), 2.90 (d, *J* = 13.2 Hz, 1H), 2.86 (d, *J* = 13.2 Hz, 1H), 1.38 (s, 3H);

<sup>13</sup>C NMR (101 MHz, CDCl<sub>3</sub>): δ 159.6, 148.1, 136.3, 134.3, 131.6, 128.5, 123.4, 120.6 (q, *J* = 256.7 Hz), 120.5, 109.9, 81.9, 46.3, 46.1, 24.5;

<sup>19</sup>F NMR (376 MHz, CDCl<sub>3</sub>): δ -57.8;

HRMS: (APCI) calcd for C<sub>17</sub>H<sub>15</sub>F<sub>3</sub>NaO<sub>2</sub><sup>+</sup>[M+Na]<sup>+</sup> 331.0916; found 331.0929.

The enantiomeric purity was established by HPLC analysis using a chiral column: OD-H column, 30 °C, *n*-Hexane/*i*-Propanol = 99/1 as eluent, 254 nm, 0.5 mL/min. tR = 9.8 min (major), 10.2 min (minor).

Optical Rotation: [α]<sub>D</sub><sup>30</sup> -24.4 (c 0.38, CHCl<sub>3</sub>) for 92% ee.

Absolute stereochemistry was determined through analogy with **3aa**.

<色谱图>

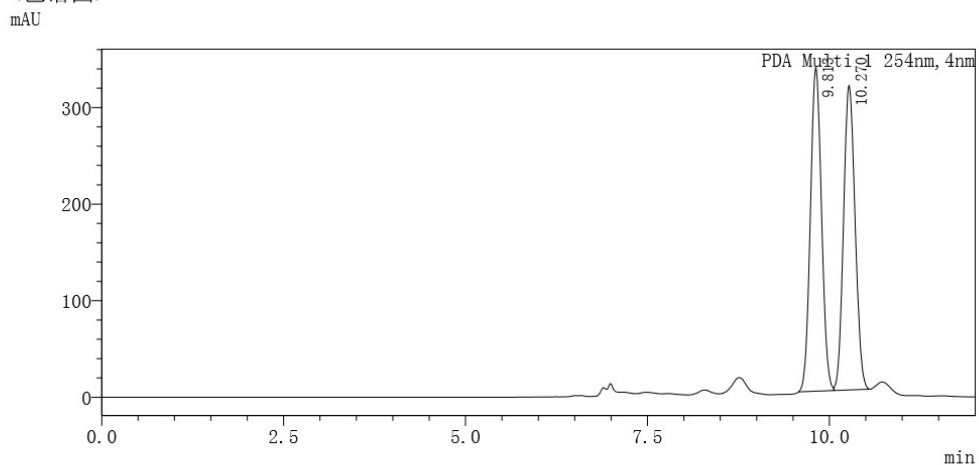

<峰表>

| 峰号 | 保留时间   | 面积      | 高度     | 浓度    | 浓度单位 | 标记  | 化合物名 |
|----|--------|---------|--------|-------|------|-----|------|
| 1  | 9.813  | 3558921 | 335269 | 0.000 |      | M   |      |
| 2  | 10.270 | 3482360 | 315592 | 0.000 |      | V M |      |
| 总计 |        | 7041281 | 650861 |       |      |     |      |

peak number

retention time

area

height

<色谱图>

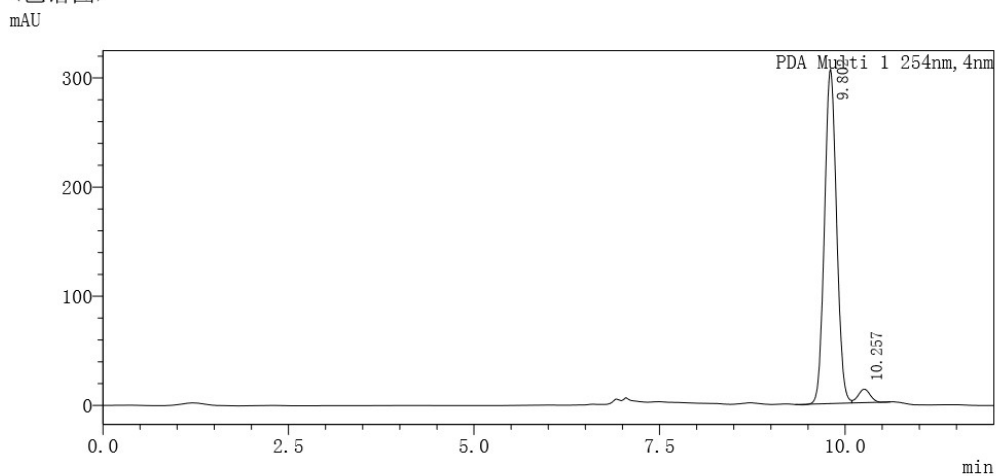

<峰表>

| 峰号 | 保留时间   | 面积      | 高度     | 浓度    | 浓度单位 | 标记  | 化合物名 |
|----|--------|---------|--------|-------|------|-----|------|
| 1  | 9.802  | 3458652 | 306390 | 0.000 |      | M   |      |
| 2  | 10.257 | 138043  | 12365  | 0.000 |      | V M |      |
| 总计 |        | 3596695 | 318755 |       |      |     |      |

peak number

retention time

area

height

Methyl (*R*)-4-((3-methyl-2,3-dihydrobenzofuran-3-yl)methyl)benzoate (**3ag**)

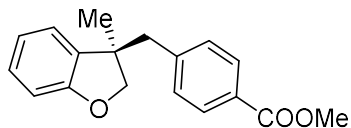

Chemical Formula: C<sub>18</sub>H<sub>18</sub>O<sub>3</sub>

Exact Mass: 282.1256

**3ag** was prepared according to general procedure using **1a** and **2g** and was purified by silica gel column chromatography (petroleum ether/EtOAc = 100/1~30/1) to obtain **3ag** as colorless oil (75% yield). <sup>1</sup>H NMR (400 MHz, CDCl<sub>3</sub>): δ 7.90 (d, *J* = 8.4 Hz, 2H), 7.14 (ddd, *J* = 8.0, 7.1, 1.7 Hz, 1H), 7.06-6.98 (m, 2H), 6.95-6.82 (m, 2H), 6.75 (dt, *J* = 8.0, 0.8 Hz, 1H), 4.47 (d, *J* = 8.7 Hz, 1H), 4.08 (d, *J* = 8.7 Hz, 1H), 3.90 (s, 3H), 2.93 (d, *J* = 2.0 Hz, 2H), 1.38 (s, 3H);

<sup>13</sup>C NMR (101 MHz, CDCl<sub>3</sub>): δ 167.0, 159.5, 142.9, 134.0, 130.3, 129.1, 128.4, 123.3, 120.3, 109.8, 81.8, 52.0, 46.7, 46.2, 24.5;

HRMS: (ESI) calcd for C<sub>18</sub>H<sub>19</sub>O<sub>3</sub><sup>+</sup>[M+H]<sup>+</sup> 283.1329; found 283.1317.

The enantiomeric purity was established by HPLC analysis using a chiral column: AD-H column, 30 °C, *n*-Hexane/*i*-Propanol = 97/3 as eluent, 254 nm, 1 mL/min. t<sub>R</sub> = 7.8 min (minor), 8.2 min (major).

Optical Rotation: [α]<sub>D</sub><sup>28</sup> -34.1 (c 0.3, CHCl<sub>3</sub>) for 93% ee.

Absolute stereochemistry was determined through analogy with **3aa**.

<色谱图>

mAU

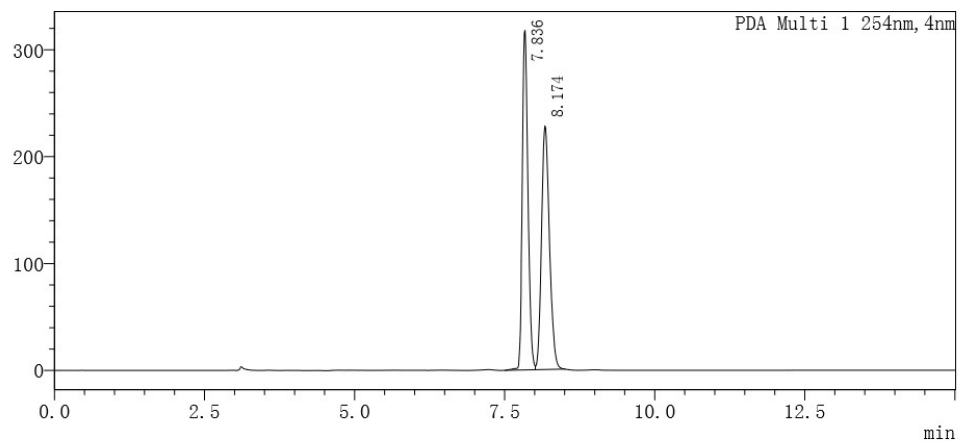

<峰表>

PDA Ch1 254nm

| 峰号 | 保留时间  | 面积      | 高度     | 浓度    | 浓度单位 | 标记  | 化合物名 |
|----|-------|---------|--------|-------|------|-----|------|
| 1  | 7.836 | 2094398 | 317763 | 0.000 |      | M   |      |
| 2  | 8.174 | 2094584 | 228006 | 0.000 |      | V M |      |
| 总计 |       | 4188983 | 545768 |       |      |     |      |

peak number

area

height

retention time

<色谱图>

mAU

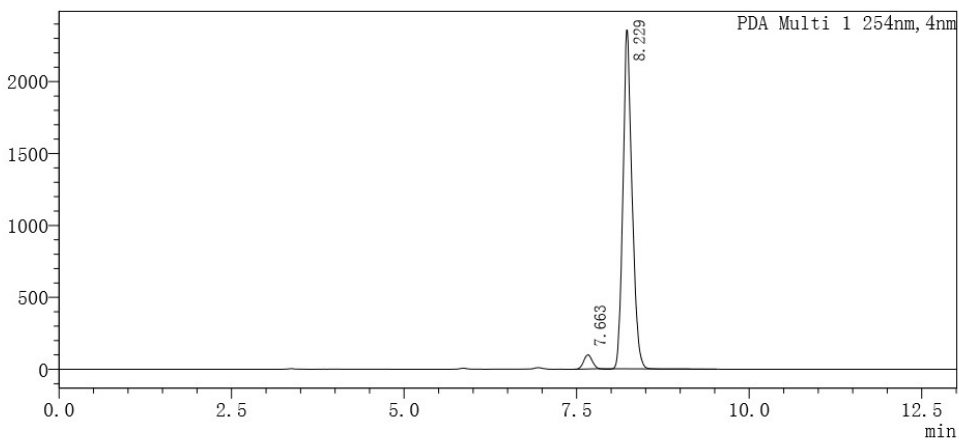

<峰表>

PDA Ch1 254nm

| 峰号 | 保留时间  | 面积       | 高度      | 浓度    | 浓度单位 | 标记 | 化合物名 |
|----|-------|----------|---------|-------|------|----|------|
| 1  | 7.663 | 844966   | 98944   | 0.000 |      | M  |      |
| 2  | 8.229 | 21447204 | 2354743 | 0.000 |      | M  |      |
| 总计 |       | 22292170 | 2453688 |       |      |    |      |

peak number

area

height

retention time

(*R*)-4-((3-methyl-2,3-dihydrobenzofuran-3-yl)methyl)benzonitrile (**3ah**)

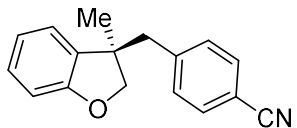

Chemical Formula: C<sub>17</sub>H<sub>15</sub>NO

Exact Mass: 249.1154

**3ah** was prepared according to general procedure using **1a** and **2h** and was purified by silica gel column chromatography (petroleum ether/EtOAc = 100/1~30/1) to obtain **3ah** as colorless oil (50% yield). <sup>1</sup>H NMR (400 MHz, CDCl<sub>3</sub>): δ 7.56-7.46 (m, 2H), 7.19-7.08 (m, 1H), 7.04-6.98 (m, 2H), 6.92-6.82 (m, 2H), 6.73 (dt, *J* = 7.9, 0.8 Hz, 1H), 4.43 (d, *J* = 8.8 Hz, 1H), 4.10 (d, *J* = 8.9 Hz, 1H), 2.93 (d, *J* = 13.2 Hz, 1H), 2.89 (d, *J* = 13.2 Hz, 1H), 1.40 (s, 3H);

<sup>13</sup>C NMR (101 MHz, CDCl<sub>3</sub>): δ 159.5, 143.1, 133.4, 131.6, 130.9, 128.6, 123.2, 120.5, 118.9, 110.5, 109.9, 81.7, 47.0, 46.3, 24.4;

HRMS: (ESI) calcd for C<sub>17</sub>H<sub>15</sub>NaNO<sup>+</sup>[M+Na]<sup>+</sup> 272.1046; found 272.1044.

The enantiomeric purity was established by HPLC analysis using a chiral column: OD-H column, 30 °C, *n*-Hexane/*i*-Propanol = 98/2 as eluent, 254 nm, 1 mL/min. t<sub>R</sub> = 12.8 min (major), 14.1 min (minor).

Optical Rotation: [α]<sub>D</sub><sup>30</sup> -29.8 (c 0.2, CHCl<sub>3</sub>) for 96% ee.

Absolute stereochemistry was determined through analogy with **3aa**.

<色谱图>  
mAU

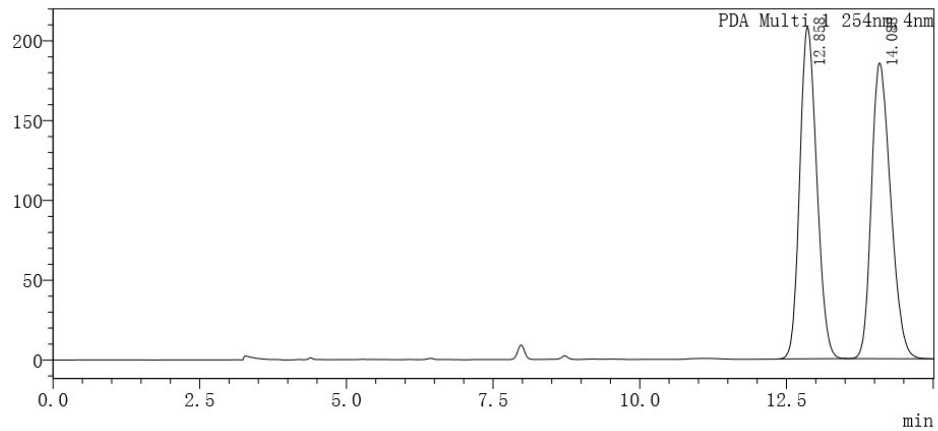

<峰表>

| 峰号 | 保留时间   | 面积      | 高度     | 浓度    | 浓度单位 | 标记 | 化合物名 |
|----|--------|---------|--------|-------|------|----|------|
| 1  | 12.858 | 4196621 | 207830 | 0.000 |      | M  |      |
| 2  | 14.088 | 4242168 | 185394 | 0.000 |      | M  |      |
| 总计 |        | 8438789 | 393224 |       |      |    |      |

peak number

retention time

area

height

<色谱图>  
mAU

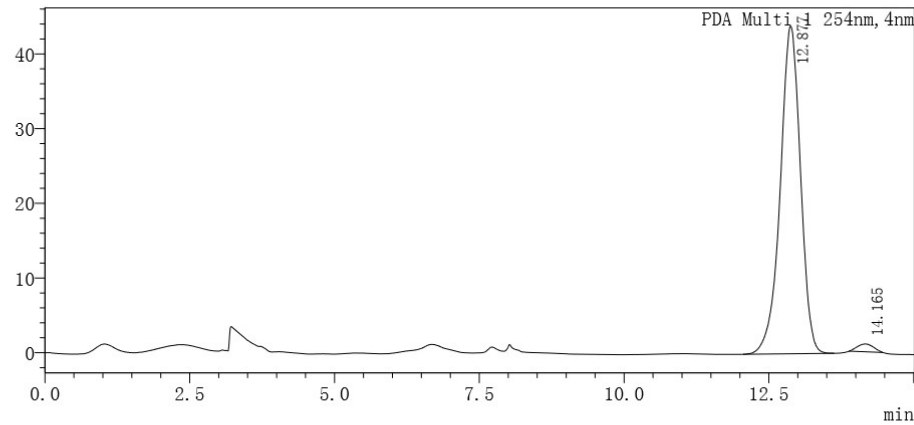

<峰表>

| 峰号 | 保留时间   | 面积      | 高度    | 浓度    | 浓度单位 | 标记 | 化合物名 |
|----|--------|---------|-------|-------|------|----|------|
| 1  | 12.877 | 1065815 | 43884 | 0.000 |      | M  |      |
| 2  | 14.165 | 20424   | 1054  | 0.000 |      | M  |      |
| 总计 |        | 1086239 | 44938 |       |      |    |      |

peak number

retention time

area

height



(*R*)-1-(4-((3-methyl-2,3-dihydrobenzofuran-3-yl)methyl)phenyl)ethan-1-one (**3ai**)

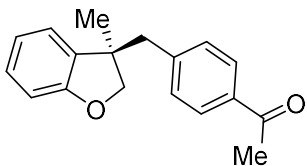

Chemical Formula: C<sub>18</sub>H<sub>18</sub>O<sub>2</sub>

Exact Mass: 266.1307

**3ai** was prepared according to general procedure using **1a** and **2i** and was purified by silica gel column chromatography (petroleum ether/EtOAc = 100/1~30/1) to obtain **3ai** as colorless oil (91% yield). <sup>1</sup>H NMR (400 MHz, CDCl<sub>3</sub>): δ 7.88-7.76 (m, 2H), 7.17-7.08 (m, 1H), 7.06-7.01 (m, 2H), 6.97- 6.81 (m, 2H), 6.74 (dt, *J* = 8.1, 0.7 Hz, 1H), 4.46 (d, *J* = 8.7 Hz, 1H), 4.07 (d, *J* = 8.8 Hz, 1H), 2.94 (d, *J* = 13.2 Hz, 1H), 2.90 (d, *J* = 13.2 Hz, 1H), 2.56 (s, 3H), 1.37 (s, 3H);

<sup>13</sup>C NMR (101 MHz, CDCl<sub>3</sub>): δ 197.8, 159.5, 143.2, 135.5, 134.0, 130.5, 128.4, 128.0, 123.3, 120.4, 109.8, 81.8, 46.7, 46.3, 26.5, 24.5;

HRMS: (ESI) calcd for C<sub>18</sub>H<sub>18</sub>NaO<sub>2</sub><sup>+</sup>[M+Na]<sup>+</sup> 289.1199; found 289.1193.

The enantiomeric purity was established by HPLC analysis using a chiral column: AD-H column, 30 °C, *n*-Hexane/*i*-Propanol = 90/10 as eluent, 254 nm, 1 mL/min. tR = 6.6 min (minor), 7.2 min (major).

Optical Rotation: [α]<sub>D</sub><sup>30</sup> -41.7 (c 0.23, CHCl<sub>3</sub>) for 94% ee.

Absolute stereochemistry was determined through analogy with **3aa**.

<色谱图>

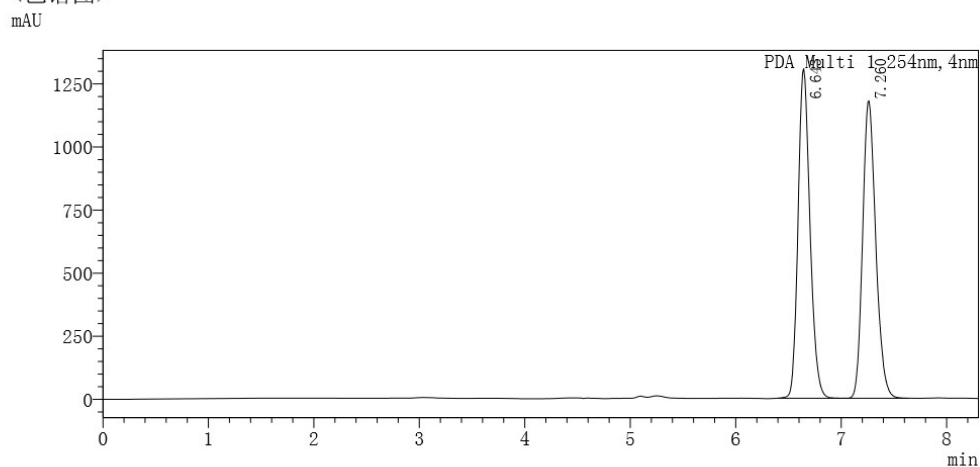

<峰表>

PDA Ch1 254nm

| 峰号 | 保留时间  | 面积       | 高度      | 浓度    | 浓度单位 | 标记 | 化合物名 |
|----|-------|----------|---------|-------|------|----|------|
| 1  | 6.643 | 10226235 | 1306393 | 0.000 |      | M  |      |
| 2  | 7.260 | 10202715 | 1179234 | 0.000 |      | M  |      |
| 总计 |       | 20428949 | 2485628 |       |      |    |      |

peak number

area

height

retention time

<色谱图>

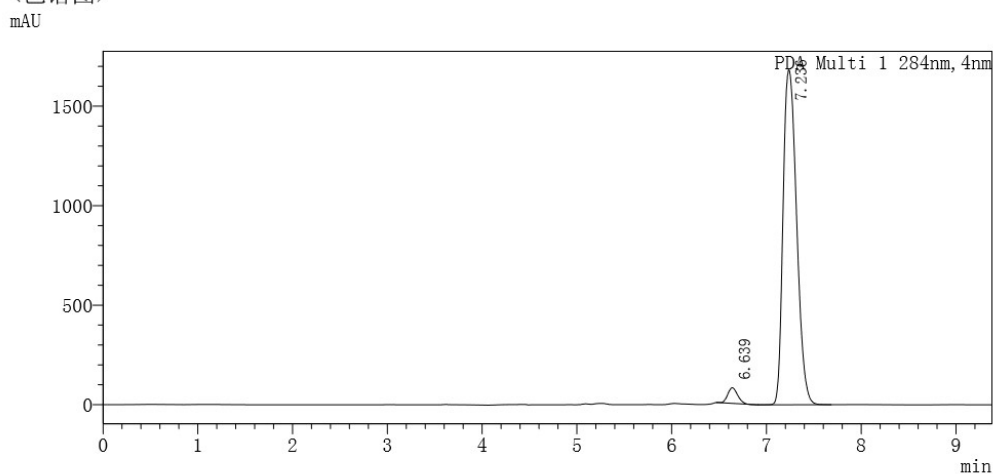

<峰表>

PDA Ch1 284nm

| 峰号 | 保留时间  | 面积       | 高度      | 浓度    | 浓度单位 | 标记 | 化合物名 |
|----|-------|----------|---------|-------|------|----|------|
| 1  | 6.639 | 558895   | 78386   | 0.000 |      | M  |      |
| 2  | 7.236 | 16708239 | 1682879 | 0.000 |      | M  |      |
| 总计 |       | 17267134 | 1761264 |       |      |    |      |

peak number

area

height

retention time

(*R*)-*N,N*-dimethyl-4-((3-methyl-2,3-dihydrobenzofuran-3-yl)methyl)benzamide (**3aj**)

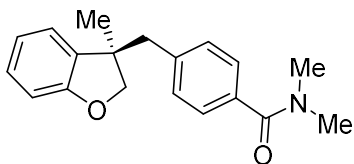

Chemical Formula:  $C_{19}H_{21}NO_2$

Exact Mass: 295.1572

**3aj** was prepared according to general procedure using **1a** and **2j** and was purified by silica gel column chromatography (petroleum ether/EtOAc = 100/1~30/1) to obtain **3aj** as colorless oil (91% yield).  $^1H$  NMR (400 MHz,  $CDCl_3$ ):  $\delta$  7.43-7.38 (m, 1H), 7.32-7.27 (m, 2H), 7.16-7.09 (m, 1H), 7.03-6.98 (m, 2H), 6.94-6.90 (m, 1H), 6.85 (td,  $J$  = 7.4, 1.0 Hz, 1H), 6.77-6.72 (m, 1H), 4.47 (d,  $J$  = 8.8 Hz, 1H), 4.06 (d,  $J$  = 8.7 Hz, 1H), 3.03 (bs, 6H), 2.89 (d,  $J$  = 2.1 Hz, 2H), 1.36 (s, 3H);

$^{13}C$  NMR (101 MHz,  $CDCl_3$ ):  $\delta$  171.6, 159.5, 139.2, 134.4, 130.2, 128.3, 128.3, 127.0, 126.8, 123.3, 120.3, 109.7, 81.8, 46.5, 46.2, 24.4;

HRMS: (ESI) calcd for  $C_{19}H_{21}NNaO_2^+[M+Na]^+$  318.1465; found 318.4166.

The enantiomeric purity was established by HPLC analysis using a chiral column: OJ-H column, 30 °C, *n*-Hexane/*i*-Propanol = 85/15 as eluent, 254 nm, 1 mL/min.  $t_R$  = 12.3 min (major), 13.5 min (minor).

Optical Rotation:  $[\alpha]_D^{30}$  -28.2 (c 0.35,  $CHCl_3$ ) for 92% ee.

Absolute stereochemistry was determined through analogy with **3aa**.

＜色谱图＞

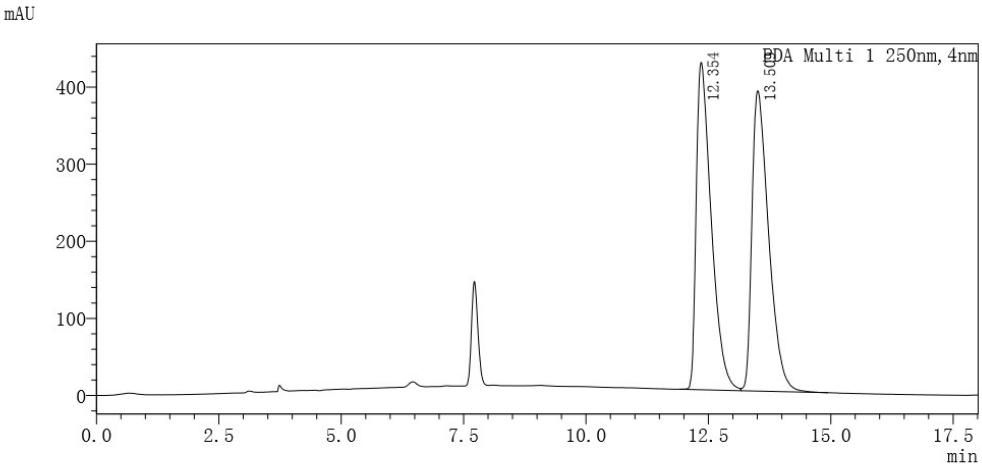

＜峰表＞

| PDA Ch1 250nm |        |          |        |       |      |     |      |
|---------------|--------|----------|--------|-------|------|-----|------|
| 峰号            | 保留时间   | 面积       | 高度     | 浓度    | 浓度单位 | 标记  | 化合物名 |
| 1             | 12.354 | 9084411  | 424953 | 0.000 |      | M   |      |
| 2             | 13.509 | 9283903  | 389558 | 0.000 |      | V M |      |
| 总计            |        | 18368314 | 814511 |       |      |     |      |

peak number

retention time

area

height

＜色谱图＞

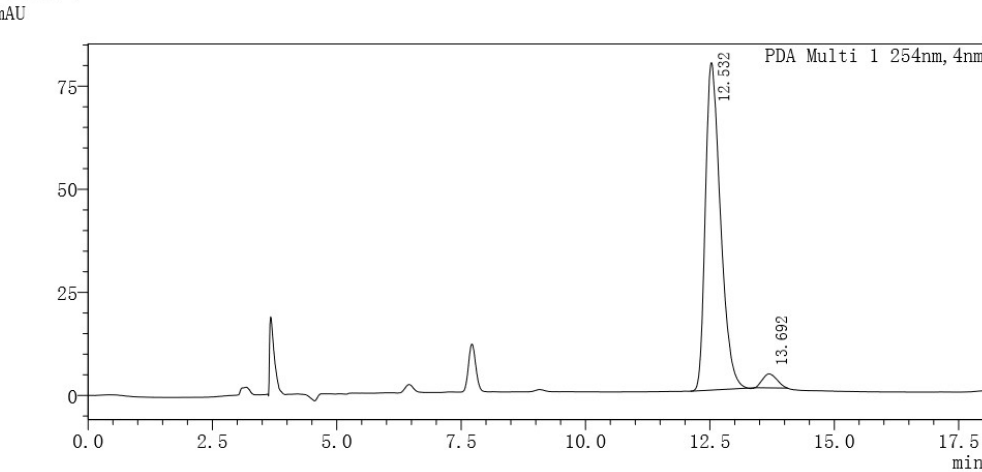

＜峰表＞

| PDA Ch1 254nm |        |         |       |       |      |    |      |
|---------------|--------|---------|-------|-------|------|----|------|
| 峰号            | 保留时间   | 面积      | 高度    | 浓度    | 浓度单位 | 标记 | 化合物名 |
| 1             | 12.532 | 1679560 | 79444 | 0.000 |      | M  |      |
| 2             | 13.692 | 68934   | 3432  | 0.000 |      | M  |      |
| 总计            |        | 1748493 | 82876 |       |      |    |      |

peak number

retention time

area

height

(*R*)-3-methyl-3-(4-(methylsulfonyl)benzyl)-2,3-dihydrobenzofuran (**3ak**)

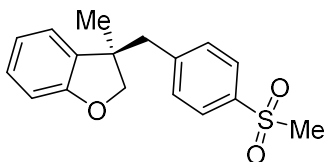

Chemical Formula: C<sub>17</sub>H<sub>18</sub>O<sub>3</sub>S

Exact Mass: 302.0977

**3ak** was prepared according to general procedure using **1a** and **2k** and was purified by silica gel column chromatography (petroleum ether/EtOAc = 100/1~30/1) to obtain **3ak** as colorless oil (65% yield). <sup>1</sup>H NMR (400 MHz, CDCl<sub>3</sub>): δ 7.78 (d, *J* = 8.3 Hz, 1H), 7.20-7.06 (m, 3H), 6.96-6.81 (m, 2H), 6.78-6.69 (m, 1H), 4.45 (d, *J* = 8.8 Hz, 1H), 4.10 (d, *J* = 8.8 Hz, 1H), 3.04 (s, 3H), 2.96 (d, *J* = 1.1 Hz, 2H), 1.39 (s, 3H);

<sup>13</sup>C NMR (101 MHz, CDCl<sub>3</sub>): δ 159.6, 144.2, 138.8, 133.6, 131.3, 128.7, 127.0, 123.4, 120.6, 110.0, 81.8, 46.7, 46.4, 44.6, 24.5;

HRMS: (ESI) calcd for C<sub>17</sub>H<sub>18</sub>NaO<sub>3</sub>S<sup>+</sup>[M+Na]<sup>+</sup> 325.0869; found 325.0864.

The enantiomeric purity was established by HPLC analysis using a chiral column: AD-H column, 30 °C, *n*-Hexane/*i*-Propanol = 70/30 as eluent, 254 nm, 1 mL/min. t<sub>R</sub> = 8.1 min (minor), 10.1 min (major).

Optical Rotation: [α]<sub>D</sub><sup>30</sup> -24.1 (c 0.42, CHCl<sub>3</sub>) for 90% ee.

Absolute stereochemistry was determined through analogy with **3aa**.

<色谱图>

mAU

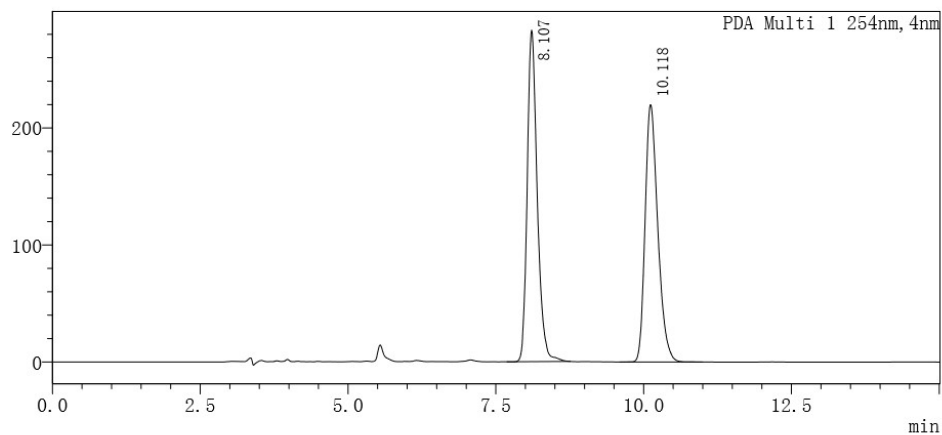

<峰表>

PDA Ch1 254nm

| 峰号 | 保留时间   | 面积      | 高度     | 浓度    | 浓度单位 | 标记 | 化合物名 |
|----|--------|---------|--------|-------|------|----|------|
| 1  | 8.107  | 3327200 | 283535 | 0.000 |      | M  |      |
| 2  | 10.118 | 3278109 | 219863 | 0.000 |      | M  |      |
| 总计 |        | 6605309 | 503397 |       |      |    |      |

peak number

area

height

retention time

<色谱图>

mAU

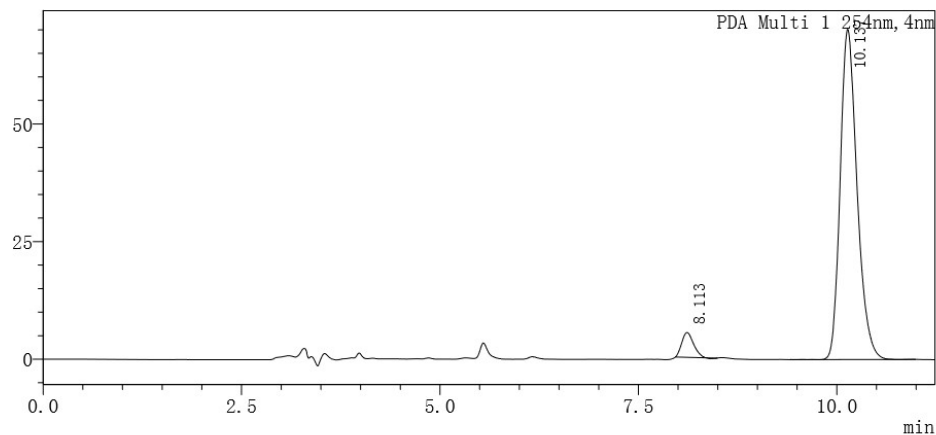

<峰表>

PDA Ch1 254nm

| 峰号 | 保留时间   | 面积      | 高度    | 浓度    | 浓度单位 | 标记 | 化合物名 |
|----|--------|---------|-------|-------|------|----|------|
| 1  | 8.113  | 53587   | 5266  | 0.000 |      | M  |      |
| 2  | 10.137 | 1038409 | 70205 | 0.000 |      | M  |      |
| 总计 |        | 1091995 | 75471 |       |      |    |      |

peak number

area

height

retention time

(*R*)-4-((3-methyl-2,3-dihydrobenzofuran-3-yl)methyl)phenol (**3al**)

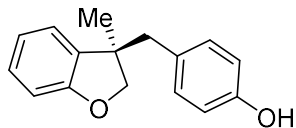

Chemical Formula: C<sub>16</sub>H<sub>16</sub>O<sub>2</sub>

Exact Mass: 240.1150

**3al** was prepared according to general procedure using **1a** and **2l** and was purified by silica gel column chromatography (petroleum ether/EtOAc = 100/1~30/1) to obtain **3al** as colorless oil (81% yield). <sup>1</sup>H NMR (400 MHz, CDCl<sub>3</sub>): δ 7.13 (ddd, *J* = 8.0, 7.4, 1.5 Hz, 1H), 6.94 (dd, *J* = 7.4, 1.5 Hz, 1H), 6.90-6.82 (m, 3H), 6.79-6.73 (m, 1H), 6.73-6.66 (m, 2H), 4.48 (d, *J* = 8.7 Hz, 1H), 4.07 (d, *J* = 8.7 Hz, 1H), 2.83 (d, *J* = 13.2 Hz, 1H), 2.79 (d, *J* = 13.2 Hz, 1H), 1.35 (s, 3H);

<sup>13</sup>C NMR (101 MHz, CDCl<sub>3</sub>): δ 159.5, 154.2, 134.8, 131.4, 129.7, 128.1, 123.4, 120.3, 114.8, 109.7, 81.9, 46.3, 45.8, 24.6;

HRMS: (ESI) calcd for C<sub>16</sub>H<sub>15</sub>O<sub>2</sub>[M-H]<sup>-</sup> 239.1078; found 239.1076.

The enantiomeric purity was established by HPLC analysis using a chiral column: AD-H column, 30 °C, *n*-Hexane/*i*-Propanol = 95/5 as eluent, 254 nm, 1 mL/min. t<sub>R</sub> = 15.4 min (major), 17.3 min (minor).

Optical Rotation: [α]<sub>D</sub><sup>30</sup> -23.9 (c 0.45, CHCl<sub>3</sub>) for 94% ee.

Absolute stereochemistry was determined through analogy with **3aa**.

<色谱图>

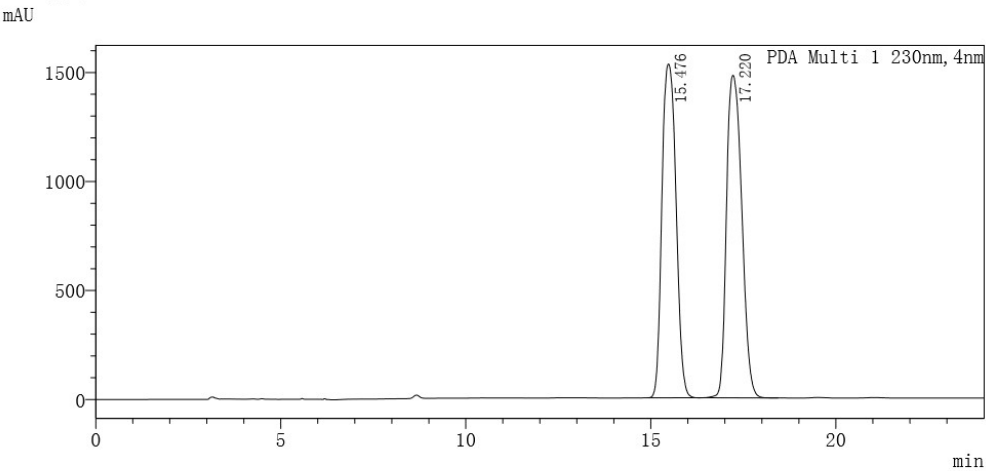

<峰表>

PDA Ch1 230nm

| 峰号 | 保留时间   | 面积       | 高度      | 浓度    | 浓度单位 | 标记 | 化合物名 |
|----|--------|----------|---------|-------|------|----|------|
| 1  | 15.476 | 40530200 | 1531314 | 0.000 |      | M  |      |
| 2  | 17.220 | 42467195 | 1479441 | 0.000 |      | M  |      |
| 总计 |        | 82997395 | 3010755 |       |      |    |      |

peak number

retention time

area

height

<色谱图>

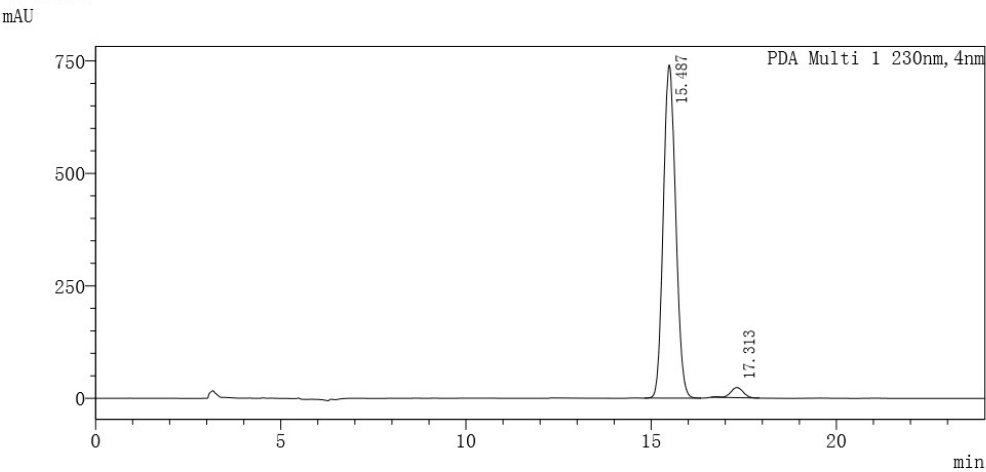

<峰表>

PDA Ch1 230nm

| 峰号 | 保留时间   | 面积       | 高度     | 浓度    | 浓度单位 | 标记 | 化合物名 |
|----|--------|----------|--------|-------|------|----|------|
| 1  | 15.487 | 17263812 | 740573 | 0.000 |      | M  |      |
| 2  | 17.313 | 534647   | 22744  | 0.000 |      | M  |      |
| 总计 |        | 17798459 | 763317 |       |      |    |      |

peak number

retention time

area

height



(*R*)-3-(3-chlorobenzyl)-3-methyl-2,3-dihydrobenzofuran (**3am**)

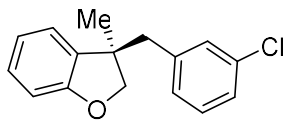

Chemical Formula: C<sub>16</sub>H<sub>15</sub>ClO

Exact Mass: 258.0811

**3am** was prepared according to general procedure using **1a** and **2m** and was purified by silica gel column chromatography (petroleum ether/EtOAc = 100/1~30/1) to obtain **3am** as colorless oil (75% yield). <sup>1</sup>H NMR (400 MHz, CDCl<sub>3</sub>): δ 7.24-7.10 (m, 3H), 6.99-6.82 (m, 4H), 6.77 (dt, *J* = 8.0, 0.8 Hz, 1H), 4.47 (d, *J* = 8.8 Hz, 1H), 4.08 (d, *J* = 8.8 Hz, 1H), 2.88 (d, *J* = 13.2 Hz, 1H), 2.83 (d, *J* = 13.2 Hz, 1H), 1.37 (s, 3H);

<sup>13</sup>C NMR (101 MHz, CDCl<sub>3</sub>): δ 159.5, 139.5, 134.2, 133.7, 130.3, 129.1, 128.5, 128.4, 126.7, 123.3, 120.4, 109.8, 81.7, 46.3, 46.2, 24.4;

HRMS: (ESI) calcd for C<sub>16</sub>H<sub>15</sub>ClNaO<sup>+</sup> [M+Na]<sup>+</sup> 281.0704; found 281.0702.

The enantiomeric purity was established by HPLC analysis using a chiral column: OD-H column, 30 °C, *n*-Hexane/*i*-Propanol = 98/2 as eluent, 254 nm, 1 mL/min. tR = 5.8 min (major), 6.0 min (minor).

Optical Rotation: [α]<sub>D</sub><sup>30</sup> -38.0 (c 0.25, CHCl<sub>3</sub>) for 93% ee.

Absolute stereochemistry was determined through analogy with **3aa**.

<色谱图>

mAU

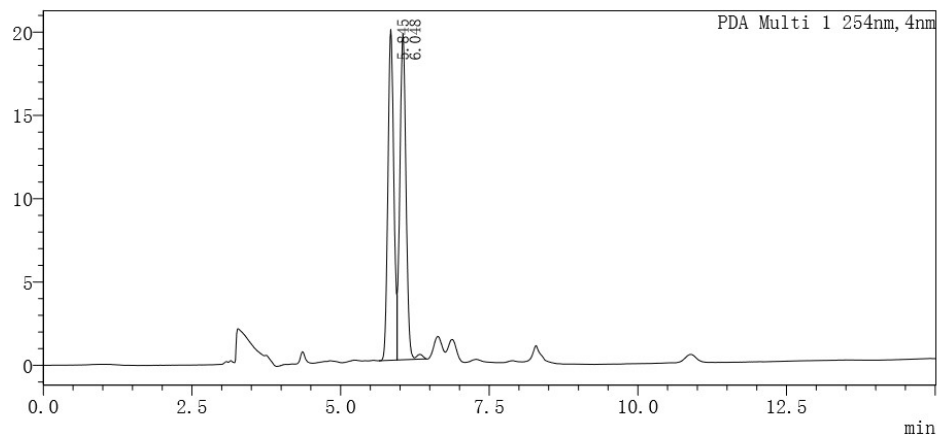

<峰表>

PDA Ch1 254nm

| 峰号 | 保留时间  | 面积     | 高度    | 浓度    | 浓度单位 | 标记  | 化合物名 |
|----|-------|--------|-------|-------|------|-----|------|
| 1  | 5.845 | 137957 | 19871 | 0.000 |      | M   |      |
| 2  | 6.048 | 140522 | 19600 | 0.000 |      | V M |      |
| 总计 |       | 278479 | 39471 |       |      |     |      |

peak number

retention time

area

height

<色谱图>

mAU

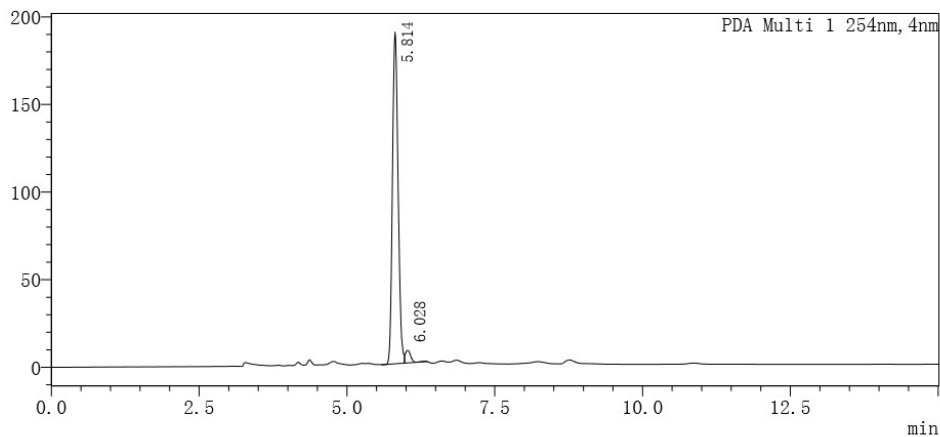

<峰表>

PDA Ch1 254nm

| 峰号 | 保留时间  | 面积      | 高度     | 浓度    | 浓度单位 | 标记  | 化合物名 |
|----|-------|---------|--------|-------|------|-----|------|
| 1  | 5.814 | 1255885 | 189384 | 0.000 |      | M   |      |
| 2  | 6.028 | 45261   | 7192   | 0.000 |      | V M |      |
| 总计 |       | 1301146 | 196576 |       |      |     |      |

peak number

retention time

area

height

(*R*)-3-(3-fluoro-4-methylbenzyl)-3-methyl-2,3-dihydrobenzofuran (**3an**)

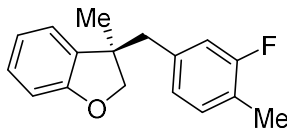

Chemical Formula: C<sub>17</sub>H<sub>17</sub>FO

Exact Mass: 256.1263

**3an** was prepared according to general procedure using **1a** and **2n** and was purified by silica gel column chromatography (petroleum ether/EtOAc = 100/1~30/1) to obtain **3an** as colorless oil (72% yield). <sup>1</sup>H NMR (400 MHz, CDCl<sub>3</sub>): δ 7.15 (ddd, *J* = 8.0, 7.3, 1.5 Hz, 1H), 7.07-7.00 (m, 1H), 6.98-6.94 (m, 1H), 6.88 (td, *J* = 7.4, 1.0 Hz, 1H), 6.77 (dt, *J* = 8.0, 0.8 Hz, 1H), 6.70-6.60 (m, 2H), 4.47 (d, *J* = 8.7 Hz, 1H), 4.07 (d, *J* = 8.7 Hz, 1H), 2.86 (d, *J* = 13.2 Hz, 1H), 2.82 (d, *J* = 13.2 Hz, 1H), 2.24 (d, *J* = 1.8 Hz, 3H), 1.37 (s, 3H);

<sup>13</sup>C NMR (101 MHz, CDCl<sub>3</sub>): δ 160.8 (d, *J* = 244.2 Hz), 159.5, 137.1 (d, *J* = 7.2 Hz), 134.50, 130.8 (d, *J* = 5.6 Hz), 128.3, 125.7 (d, *J* = 3.3 Hz), 123.2, 122.7 (d, *J* = 17.2 Hz), 120.4, 116.7 (d, *J* = 22.0 Hz), 109.7, 81.8, 46.2, 46.1, 24.6, 14.2 (d, *J* = 3.5 Hz);

HRMS: (APCI) calcd for C<sub>17</sub>H<sub>17</sub>FNaO<sup>+</sup> [M+Na]<sup>+</sup> 279.1156; found 279.1152.

The enantiomeric purity was established by HPLC analysis using a chiral column: OD-H column, 30 °C, *n*-Hexane/*i*-Propanol = 99/1 as eluent, 254 nm, 0.5 mL/min. t<sub>R</sub> = 10.3 min (major), 10.5 min (minor).

Optical Rotation: [α]<sub>D</sub><sup>30</sup> -29.9 (c 0.29, CHCl<sub>3</sub>) for 94% ee.

Absolute stereochemistry was determined through analogy with **3aa**.

<色谱图>

mAU

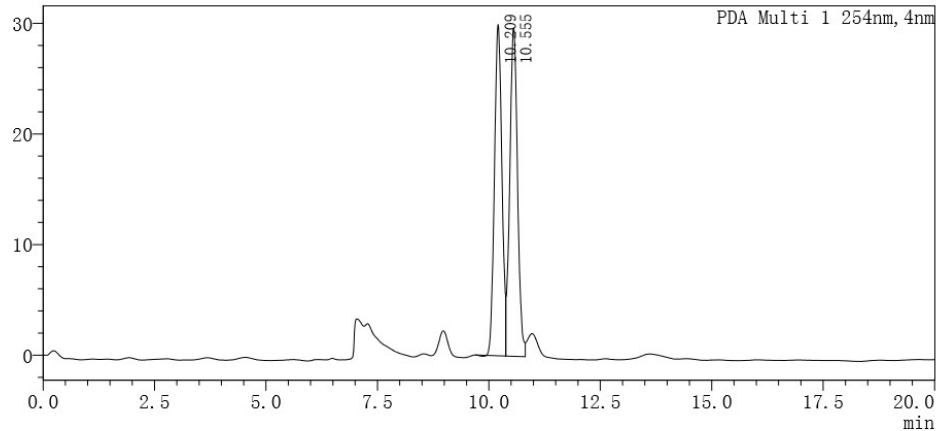

<峰表>

PDA Ch1 254nm

| 峰号 | 保留时间   | 面积     | 高度    | 浓度    | 浓度单位 | 标记  | 化合物名 |
|----|--------|--------|-------|-------|------|-----|------|
| 1  | 10.209 | 347894 | 29957 | 0.000 |      | M   |      |
| 2  | 10.555 | 358681 | 29691 | 0.000 |      | V M |      |
| 总计 |        | 706575 | 59648 |       |      |     |      |

peak number

area

height

retention time

<色谱图>

mAU

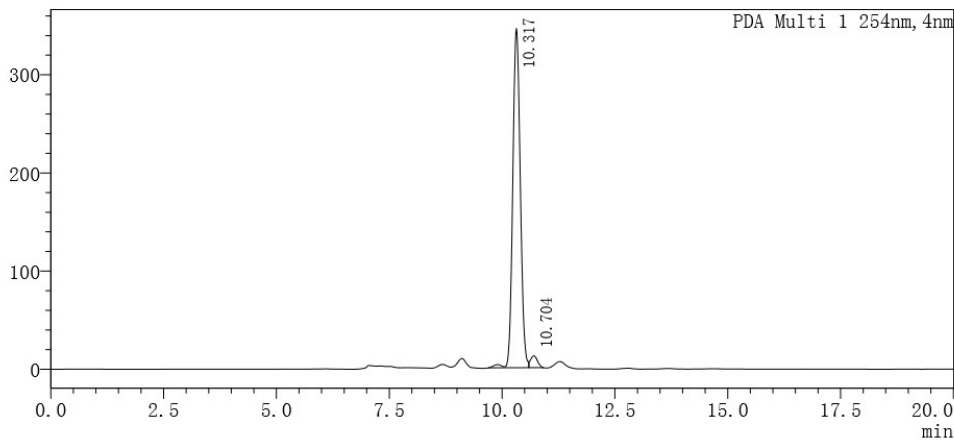

<峰表>

PDA Ch1 254nm

| 峰号 | 保留时间   | 面积      | 高度     | 浓度    | 浓度单位 | 标记  | 化合物名 |
|----|--------|---------|--------|-------|------|-----|------|
| 1  | 10.317 | 4013492 | 345810 | 0.000 |      | M   |      |
| 2  | 10.704 | 128053  | 12056  | 0.000 |      | V M |      |
| 总计 |        | 4141545 | 357867 |       |      |     |      |

peak number

area

height

retention time

(*R*)-3-(3,5-bis(trifluoromethyl)benzyl)-3-methyl-2,3-dihydrobenzofuran (**3ao**)

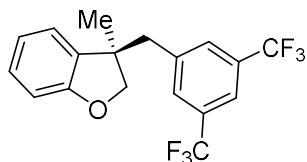

Chemical Formula: C<sub>18</sub>H<sub>14</sub>F<sub>6</sub>O

Exact Mass: 360.0949

**3ao** was prepared according to general procedure using **1a** and **2o** and was purified by silica gel column chromatography (petroleum ether/EtOAc = 100/1~30/1) to obtain **3ao** as colorless oil (27% yield). <sup>1</sup>H NMR (400 MHz, CDCl<sub>3</sub>): δ 7.73-7.68 (m, 1H), 7.27-7.20 (m, 2H), 7.15 (ddd, *J* = 8.1, 7.0, 1.9 Hz, 1H), 6.94-6.82 (m, 2H), 6.70 (dt, *J* = 8.1, 0.8 Hz, 1H), 4.40 (d, *J* = 8.9 Hz, 1H), 4.12 (d, *J* = 8.9 Hz, 1H), 2.95 (s, 2H), 1.42 (s, 3H);

<sup>13</sup>C NMR (101 MHz, CDCl<sub>3</sub>): δ 159.6, 139.8, 132.7, 131.1, 130.8, 130.2, 128.9, 123.3 (q, *J* = 272.3 Hz), 123.2, 120.6, 110.1, 81.5, 46.7, 46.3, 23.9;

<sup>19</sup>F NMR (376 MHz, CDCl<sub>3</sub>): δ -62.81;

HRMS: (APCI) calcd for C<sub>18</sub>H<sub>15</sub>F<sub>6</sub>O<sup>+</sup> [M+H]<sup>+</sup> 361.1022; found 361.1036.

The enantiomeric purity was established by HPLC analysis using a chiral column: OD-H column, 30 °C, *n*-Hexane/*i*-Propanol = 98/2 as eluent, 254 nm, 0.5 mL/min. t<sub>R</sub> = 8.9 min (minor), 9.3 min (major).

Optical Rotation: [α]<sub>D</sub><sup>30</sup> -201.4 (c 0.03, CHCl<sub>3</sub>) for 88% ee.

Absolute stereochemistry was determined through analogy with **3aa**.

<色谱图>

mAU

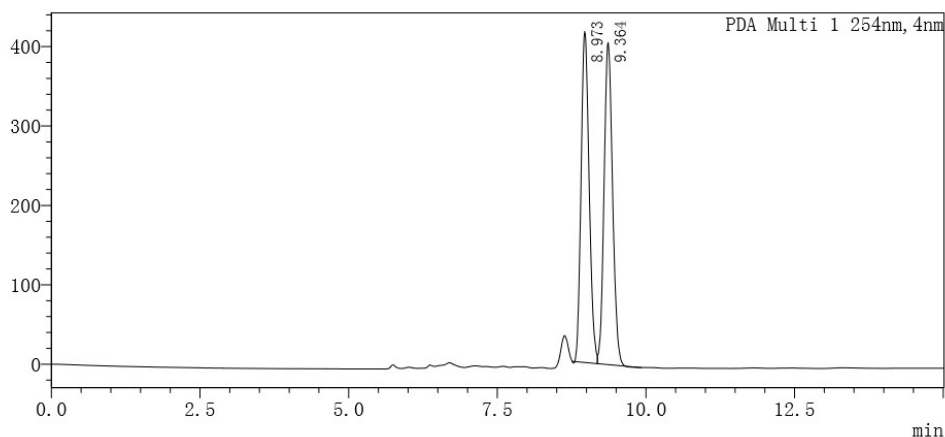

<峰表>

PDA Ch1 254nm

| 峰号 | 保留时间  | 面积      | 高度     | 浓度    | 浓度单位 | 标记  | 化合物名 |
|----|-------|---------|--------|-------|------|-----|------|
| 1  | 8.973 | 3928331 | 416799 | 0.000 |      | M   |      |
| 2  | 9.364 | 4020014 | 405646 | 0.000 |      | V M |      |
| 总计 |       | 7948345 | 822445 |       |      |     |      |

peak number  
retention time  
area  
height

<色谱图>

mAU

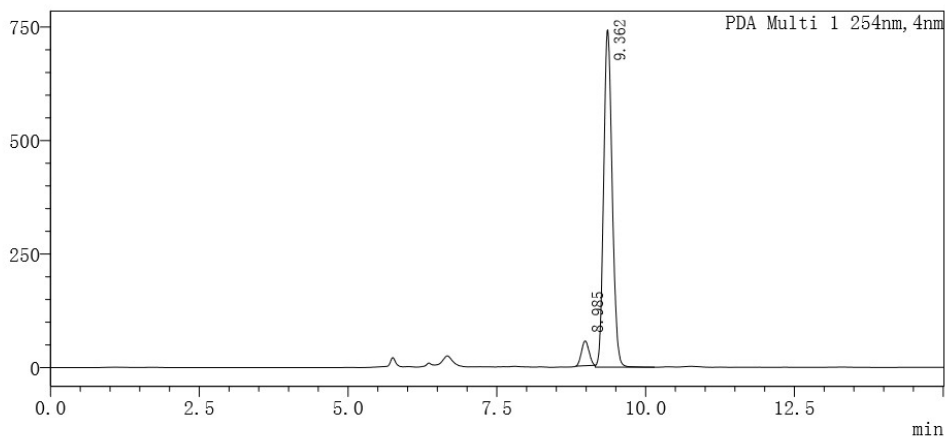

<峰表>

PDA Ch1 254nm

| 峰号 | 保留时间  | 面积      | 高度     | 浓度    | 浓度单位 | 标记 | 化合物名 |
|----|-------|---------|--------|-------|------|----|------|
| 1  | 8.985 | 478007  | 54531  | 0.000 |      | M  |      |
| 2  | 9.362 | 7404470 | 743166 | 0.000 |      | M  |      |
| 总计 |       | 7882477 | 797697 |       |      |    |      |

peak number  
retention time  
area  
height

Ethyl (R)-2-((3-methyl-2,3-dihydrobenzofuran-3-yl)methyl)benzoate (**3ap**)

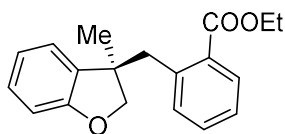

Chemical Formula: C<sub>19</sub>H<sub>20</sub>O<sub>3</sub>

Exact Mass: 296.1412

**3ap** was prepared according to general procedure using **1a** and **2p** and was purified by silica gel column chromatography (petroleum ether/EtOAc = 100/1~30/1) to obtain **3ap** as colorless oil (53% yield). <sup>1</sup>H NMR (400 MHz, CDCl<sub>3</sub>): δ 7.83 (dd, *J* = 7.5, 1.9 Hz, 1H), 7.35-7.22 (m, 2H), 7.17-7.04 (m, 1H), 6.95-6.79 (m, 3H), 6.72 (dd, *J* = 8.1, 0.8 Hz, 1H), 4.46 (d, *J* = 8.8 Hz, 1H), 4.24 (q, *J* = 7.1 Hz, 2H), 4.09 (d, *J* = 8.8 Hz, 1H), 3.70 (d, *J* = 13.1 Hz, 1H), 3.19 (d, *J* = 13.1 Hz, 1H), 1.36 (s, 3H), 1.35 (t, *J* = 3.6 Hz, 1H);

<sup>13</sup>C NMR (101 MHz, CDCl<sub>3</sub>): δ 168.0, 159.6, 138.8, 134.4, 132.5, 131.5, 131.0, 130.4, 128.1, 126.4, 123.5, 120.2, 109.6, 82.3, 60.9, 46.8, 42.3, 24.9, 14.2;

HRMS: (ESI) calcd for C<sub>19</sub>H<sub>20</sub>NaO<sub>3</sub><sup>+</sup> [M+Na]<sup>+</sup> 319.1305; found 319.1300.

The enantiomeric purity was established by HPLC analysis using a chiral column: OD-H column, 30 °C, *n*-Hexane/*i*-Propanol = 99.5/0.5 as eluent, 254 nm, 0.5 mL/min. tR = 17.1 min (major), 19.2 min (minor).

Optical Rotation: [α]<sub>D</sub><sup>30</sup> -97.9 (c 0.05, CHCl<sub>3</sub>) for 90% ee.

Absolute stereochemistry was determined through analogy with **3aa**.

<色谱图>

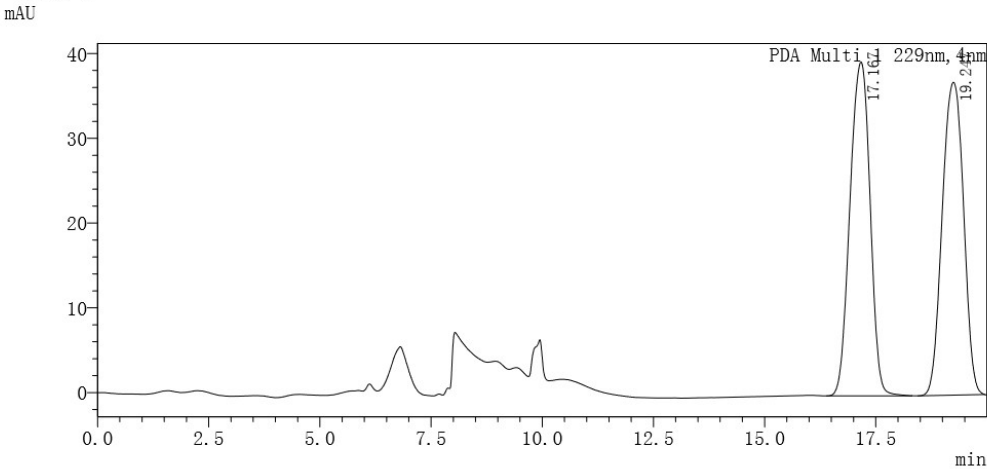

<峰表>

PDA Ch1 229nm

| 峰号 | 保留时间   | 面积      | 高度    | 浓度    | 浓度单位 | 标记 | 化合物名 |
|----|--------|---------|-------|-------|------|----|------|
| 1  | 17.167 | 1239409 | 39384 | 0.000 |      |    |      |
| 2  | 19.247 | 1230395 | 36912 | 0.000 |      |    |      |
| 总计 |        | 2469804 | 76296 |       |      |    |      |

peak number

retention time

area

height

<色谱图>

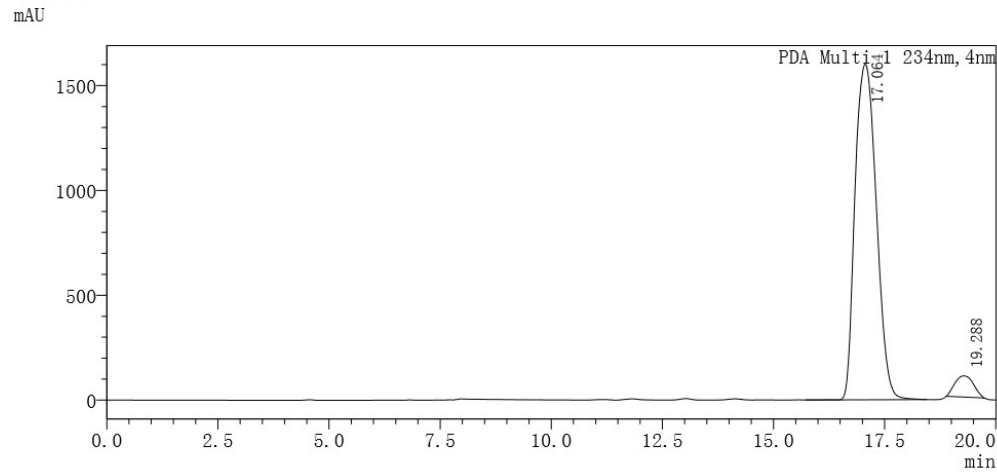

<峰表>

PDA Ch1 234nm

| 峰号 | 保留时间   | 面积       | 高度      | 浓度    | 浓度单位 | 标记 | 化合物名 |
|----|--------|----------|---------|-------|------|----|------|
| 1  | 17.064 | 53507884 | 1600927 | 0.000 |      | M  |      |
| 2  | 19.288 | 2963965  | 101405  | 0.000 |      | M  |      |
| 总计 |        | 56471849 | 1702332 |       |      |    |      |

peak number

retention time

area

height



(*R*)-3-(2-methoxybenzyl)-3-methyl-2,3-dihydrobenzofuran (**3aq**)

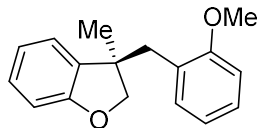

Chemical Formula: C<sub>17</sub>H<sub>18</sub>O<sub>2</sub>

Exact Mass: 254.1307

**3aq** was prepared according to general procedure using **1a** and **2q** and was purified by silica gel column chromatography (petroleum ether/EtOAc = 100/1~30/1) to obtain **3aq** as colorless oil (43% yield). The <sup>1</sup>H NMR data matched those reported in the literature<sup>1</sup>: <sup>1</sup>H NMR (400 MHz, CDCl<sub>3</sub>): δ 7.20 (ddd, *J* = 8.2, 7.3, 1.8 Hz, 1H), 7.12 (ddd, *J* = 8.0, 7.4, 1.4 Hz, 1H), 7.01 (ddd, *J* = 7.4, 1.5, 0.5 Hz, 1H), 6.92-6.78 (m, 4H), 6.76 (dt, *J* = 8.0, 0.8 Hz, 1H), 4.57 (d, *J* = 8.6 Hz, 1H), 4.06 (d, *J* = 8.6 Hz, 1H), 3.74 (s, 3H), 3.05 (d, *J* = 13.2 Hz, 1H), 2.91 (d, *J* = 13.2 Hz, 1H), 1.34 (s, 3H);

<sup>13</sup>C NMR (101 MHz, CDCl<sub>3</sub>): δ 159.5, 157.9, 135.5, 132.1, 127.9, 127.7, 126.3, 123.2, 120.1, 119.9, 110.3, 109.5, 82.4, 55.0, 46.7, 39.3, 24.9;

The enantiomeric purity was established by HPLC analysis using a chiral column: OD-H column, 30 °C, *n*-Hexane/*i*-Propanol = 99.5/0.5 as eluent, 254 nm, 0.5 mL/min. tR = 14.0 min (major), 14.5 min (minor).

Optical Rotation: [α]<sub>D</sub><sup>30</sup> -249.0 (c 0.02, CHCl<sub>3</sub>) for 90% ee.

Absolute stereochemistry was determined through analogy with **3aa**.

<色谱图>

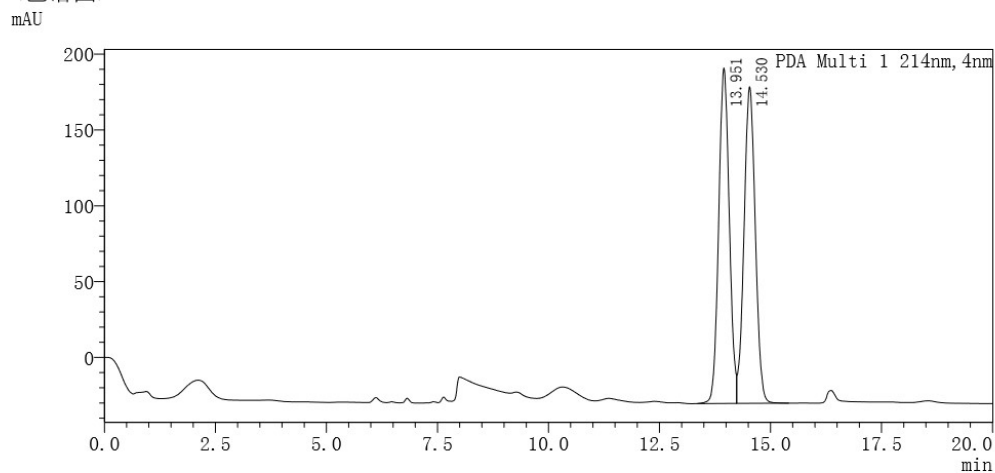

<峰表>

| 峰号 | 保留时间   | 面积      | 高度     | 浓度    | 浓度单位 | 标记  | 化合物名 |
|----|--------|---------|--------|-------|------|-----|------|
| 1  | 13.951 | 3684184 | 221247 | 0.000 |      | M   |      |
| 2  | 14.530 | 3690388 | 208769 | 0.000 |      | V M |      |
| 总计 |        | 7374572 | 430016 |       |      |     |      |

peak number

area

height

retention time

<色谱图>

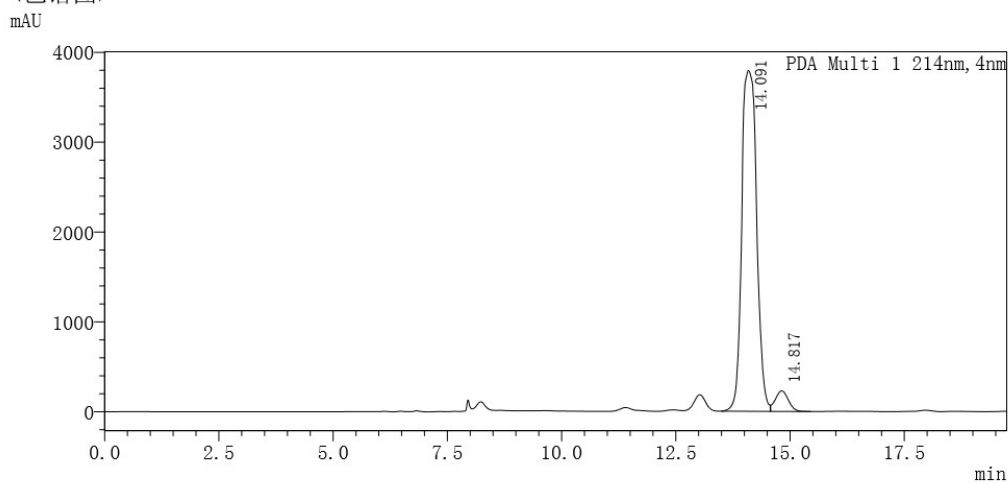

<峰表>

| 峰号 | 保留时间   | 面积       | 高度      | 浓度    | 浓度单位 | 标记  | 化合物名 |
|----|--------|----------|---------|-------|------|-----|------|
| 1  | 14.091 | 86070441 | 3792636 | 0.000 |      | M   |      |
| 2  | 14.817 | 4502195  | 228853  | 0.000 |      | V M |      |
| 总计 |        | 90572636 | 4021489 |       |      |     |      |

peak number

area

height

retention time

(*R*)-5-((3-methyl-2,3-dihydrobenzofuran-3-yl)methyl)benzo[d][1,3]dioxole (**3ar**)

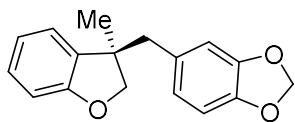

Chemical Formula: C<sub>17</sub>H<sub>16</sub>O<sub>3</sub>

Exact Mass: 268.1099

**3ar** was prepared according to general procedure using **1a** and **2r** and was purified by silica gel column chromatography (petroleum ether/EtOAc = 100/1~30/1) to obtain **3ar** as colorless oil (78% yield). The <sup>1</sup>H NMR data matched those reported in the literature<sup>1</sup>: <sup>1</sup>H NMR (400 MHz, CDCl<sub>3</sub>): δ 7.18-7.09 (m, 1H), 6.94-6.99 (m, 1H), 6.90-6.84 (m, 1H), 6.79-6.74 (m, 1H), 6.71-6.66 (m, 1H), 6.48-6.41 (m, 2H), 5.93-5.91 (m, 2H), 4.47 (d, *J* = 8.6 Hz, 1H), 4.06 (d, *J* = 8.6 Hz, 1H), 2.83 (d, *J* = 13.2 Hz, 1H), 2.78 (d, *J* = 13.2 Hz, 1H), 1.35 (s, 3H);

<sup>13</sup>C NMR (101 MHz, CDCl<sub>3</sub>): δ 159.5, 147.2, 146.2, 134.7, 131.3, 128.2, 123.4, 123.3, 123.3, 120.3, 110.6, 109.7, 107.8, 100.8, 81.8, 46.35, 46.33, 24.7;

The enantiomeric purity was established by HPLC analysis using a chiral column: OD-H column, 30 °C, *n*-Hexane/*i*-Propanol = 98/2 as eluent, 254 nm, 1 mL/min. t<sub>R</sub> = 7.0 min (major), 7.7 min (minor).

Optical Rotation: [α]<sub>D</sub><sup>30</sup> -170.0 (c 0.03, CHCl<sub>3</sub>) for 92% ee.

Absolute stereochemistry was determined through analogy with **3aa**.

<色谱图>

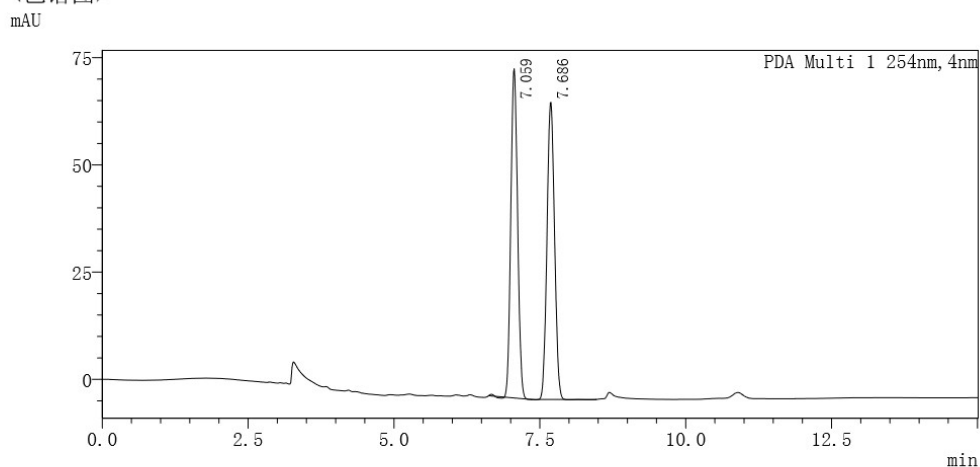

<峰表>

PDA Ch1 254nm

| 峰号 | 保留时间  | 面积      | 高度     | 浓度    | 浓度单位 | 标记 | 化合物名 |
|----|-------|---------|--------|-------|------|----|------|
| 1  | 7.059 | 617673  | 76802  | 0.000 |      | M  |      |
| 2  | 7.686 | 621121  | 69320  | 0.000 |      | M  |      |
| 总计 |       | 1238794 | 146122 |       |      |    |      |

peak number

retention time

area

height

<色谱图>

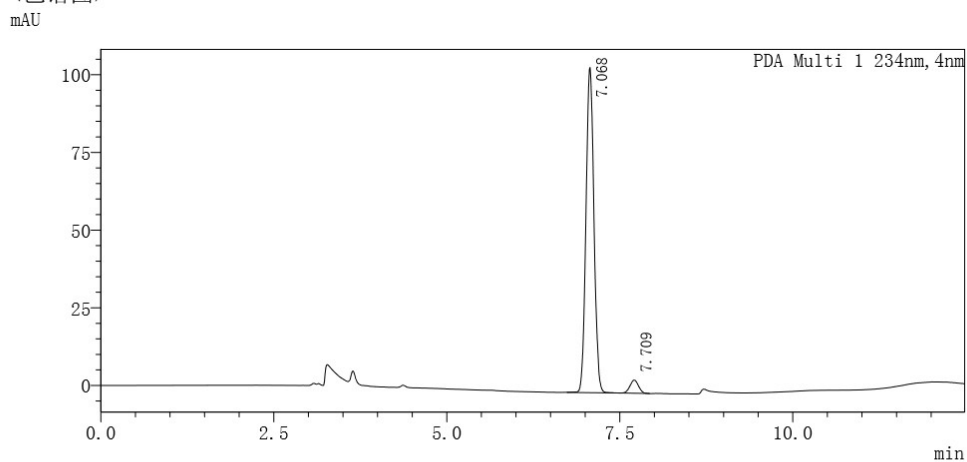

<峰表>

PDA Ch1 234nm

| 峰号 | 保留时间  | 面积     | 高度     | 浓度    | 浓度单位 | 标记 | 化合物名 |
|----|-------|--------|--------|-------|------|----|------|
| 1  | 7.068 | 834286 | 104700 | 0.000 |      | M  |      |
| 2  | 7.709 | 36153  | 4221   | 0.000 |      | M  |      |
| 总计 |       | 870438 | 108921 |       |      |    |      |

peak number

retention time

area

height

(*R*)-3-(dibenzo[*b,d*]thiophen-2-ylmethyl)-3-methyl-2,3-dihydrobenzofuran (**3as**)

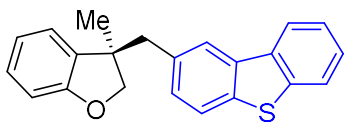

Chemical Formula: C<sub>22</sub>H<sub>18</sub>OS

Exact Mass: 330.1078

**3as** was prepared according to general procedure using **1a** and **2s** and was purified by silica gel column chromatography (petroleum ether/EtOAc = 100/1~20/1) to obtain **3as** as colorless oil (91% yield). <sup>1</sup>H NMR (400 MHz, CDCl<sub>3</sub>): δ 8.18-8.01 (m, 1H), 7.91-7.82 (m, 1H), 7.78-7.69 (m, 2H), 7.55-7.39 (m, 2H), 7.19 (ddd, *J* = 8.0, 7.3, 1.5 Hz, 1H), 7.11 (dd, *J* = 8.1, 1.8 Hz, 1H), 6.99 (ddd, *J* = 7.3, 1.5, 0.5 Hz, 1H), 6.91 (td, *J* = 7.4, 1.0 Hz, 1H), 6.81 (dt, *J* = 8.0, 0.8 Hz, 1H), 4.59 (d, *J* = 8.7 Hz, 1H), 4.14 (d, *J* = 8.7 Hz, 1H), 3.07 (d, *J* = 3.9 Hz, 2H), 1.45 (s, 3H);

<sup>13</sup>C NMR (101 MHz, CDCl<sub>3</sub>): δ 159.6, 139.7, 137.6, 135.4, 135.3, 134.5, 133.8, 129.2, 128.3, 126.6, 124.3, 123.5, 123.1, 122.8, 122.1, 121.4, 120.3, 109.8, 81.9, 46.7, 46.4, 24.4;

HRMS: (ESI) calcd for C<sub>22</sub>H<sub>18</sub>SNaO<sup>+</sup>[M+Na]<sup>+</sup> 353.0971; found 353.0971.

The enantiomeric purity was established by HPLC analysis using a chiral column: AD-H column, 30 °C, *n*-Hexane/*i*-Propanol = 90/10 as eluent, 254 nm, 1 mL/min. t<sub>R</sub> = 4.8 min (minor), 5.2 min (major).

Optical Rotation: [α]<sub>D</sub><sup>30</sup> -35.0 (c 0.6, CHCl<sub>3</sub>) for 94% ee.

Absolute stereochemistry was determined through analogy with **3aa**.

<色谱图>

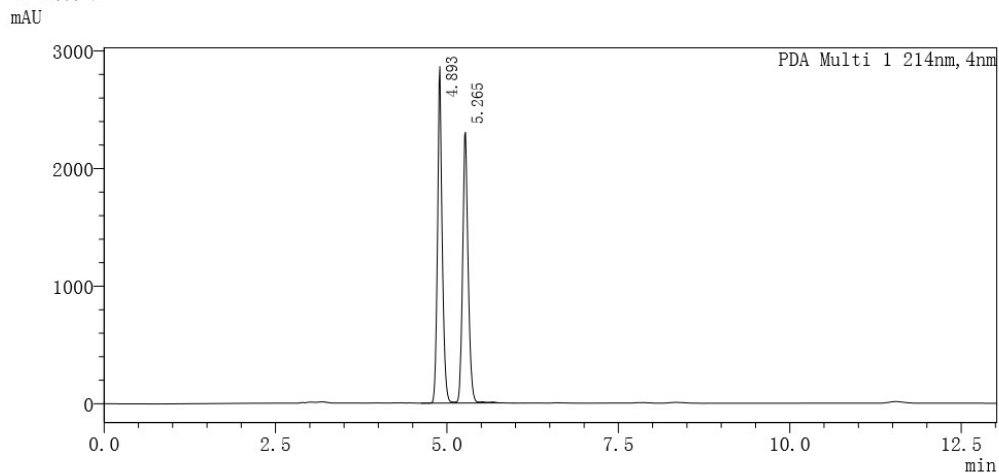

<峰表>

| PDA Ch1 214nm |       |          |         |       |      |     |      |
|---------------|-------|----------|---------|-------|------|-----|------|
| 峰号            | 保留时间  | 面积       | 高度      | 浓度    | 浓度单位 | 标记  | 化合物名 |
| 1             | 4.893 | 13496960 | 2862516 | 0.000 |      | M   |      |
| 2             | 5.265 | 12846684 | 2302530 | 0.000 |      | V M |      |
| 总计            |       | 26343645 | 5165046 |       |      |     |      |

peak number

retention time

area

height

<色谱图>

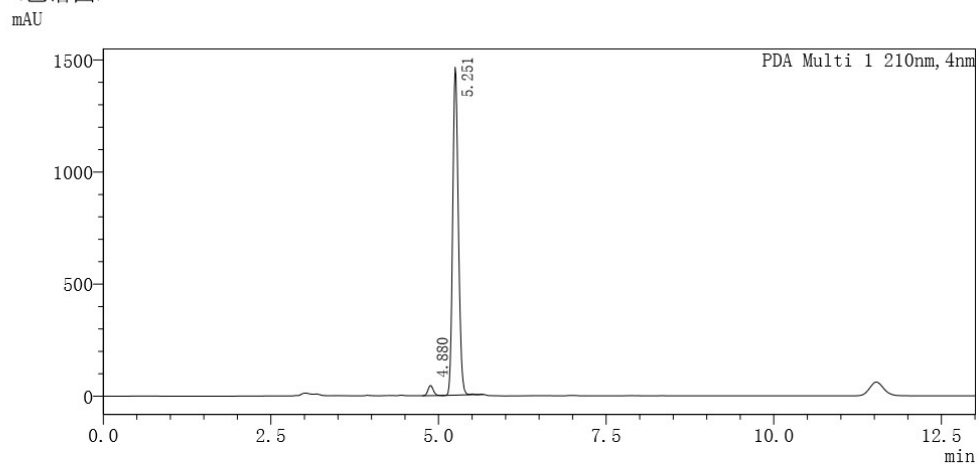

<峰表>

| PDA Ch1 210nm |       |         |         |        |      |    |      |
|---------------|-------|---------|---------|--------|------|----|------|
| 峰号            | 保留时间  | 面积      | 高度      | 浓度     | 浓度单位 | 标记 | 化合物名 |
| 1             | 4.880 | 250171  | 44859   | 2.847  |      | M  |      |
| 2             | 5.251 | 8537617 | 1463223 | 97.153 |      | M  |      |
| 总计            |       | 8787789 | 1508082 |        |      |    |      |

peak number

retention time

area

height

(*R*)-9-ethyl-3-((3-methyl-2,3-dihydrobenzofuran-3-yl)methyl)-9H-carbazole (**3at**)

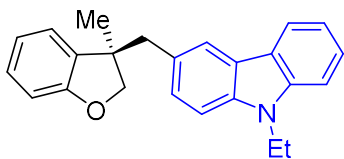

Chemical Formula: C<sub>24</sub>H<sub>23</sub>NO

Exact Mass: 341.1780

**3at** was prepared according to general procedure using **1a** and **2t** and was purified by silica gel column chromatography (petroleum ether/EtOAc = 100/1~20/1) to obtain **3at** as colorless oil (67% yield). <sup>1</sup>H NMR (400 MHz, CDCl<sub>3</sub>): δ 8.05 (dt, *J* = 7.7, 1.0 Hz, 1H), 7.75 (d, *J* = 1.6 Hz, 1H), 7.48 (ddd, *J* = 8.2, 7.0, 1.2 Hz, 1H), 7.41 (dt, *J* = 8.2, 1.0 Hz, 1H), 7.30 (d, *J* = 8.3 Hz, 1H), 7.26-7.10 (m, 3H), 7.02 (dd, *J* = 7.3, 1.5 Hz, 1H), 6.91 (td, *J* = 7.4, 1.0 Hz, 1H), 6.85-6.78 (m, 1H), 4.64 (d, *J* = 8.6 Hz, 1H), 4.36 (q, *J* = 7.2 Hz, 2H), 4.11 (d, *J* = 8.6 Hz, 1H), 3.35-2.84 (m, 2H), 1.44 (d, *J* = 5.1 Hz, 6H);

<sup>13</sup>C NMR (101 MHz, CDCl<sub>3</sub>): δ 159.6, 140.1, 138.8, 135.2, 128.2, 128.1, 127.8, 125.5, 123.5, 122.8, 122.7, 121.9, 120.3, 120.2, 118.6, 109.7, 108.4, 107.7, 82.0, 46.6, 46.5, 37.5, 24.6, 13.8;

HRMS: (ESI) calcd for C<sub>24</sub>H<sub>24</sub>NO<sup>+</sup>[M+H]<sup>+</sup> 342.1852; found 342.1836.

The enantiomeric purity was established by HPLC analysis using a chiral column: OD-H column, 30 °C, *n*-Hexane/*i*-Propanol = 95/5 as eluent, 254 nm, 1 mL/min. t<sub>R</sub> = 8.5 min (major), 10.1 min (minor).

Optical Rotation: [α]<sub>D</sub><sup>30</sup> -29.4 (c 0.5, CHCl<sub>3</sub>) for 95% ee.

Absolute stereochemistry was determined through analogy with **3aa**.

<色谱图>

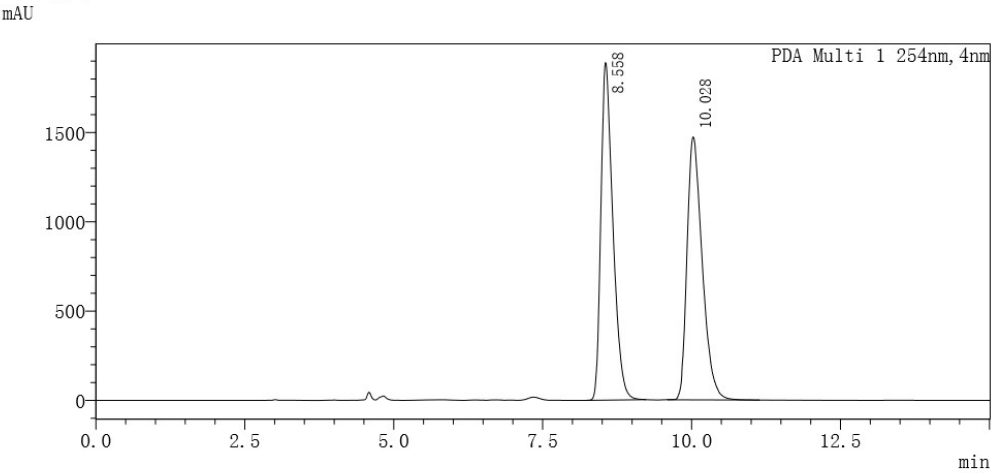

<峰表>

PDA Ch1 254nm

| 峰号 | 保留时间   | 面积       | 高度      | 浓度    | 浓度单位 | 标记 | 化合物名 |
|----|--------|----------|---------|-------|------|----|------|
| 1  | 8.558  | 26501160 | 1891030 | 0.000 |      | M  |      |
| 2  | 10.028 | 26087413 | 1473453 | 0.000 |      | M  |      |
| 总计 |        | 52588573 | 3364483 |       |      |    |      |

peak number

retention time

area

height

<色谱图>

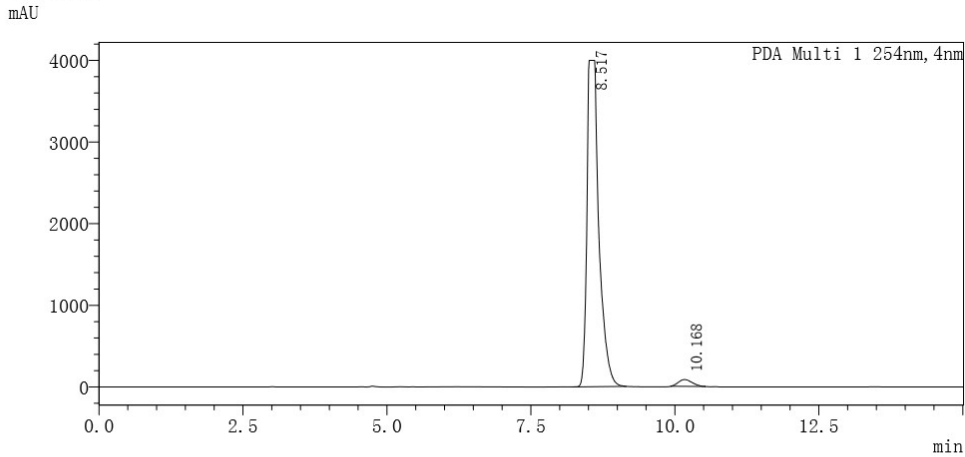

<峰表>

PDA Ch1 254nm

| 峰号 | 保留时间   | 面积       | 高度      | 浓度    | 浓度单位 | 标记 | 化合物名 |
|----|--------|----------|---------|-------|------|----|------|
| 1  | 8.517  | 57588425 | 3997396 | 0.000 |      | M  |      |
| 2  | 10.168 | 1410369  | 84428   | 0.000 |      | M  |      |
| 总计 |        | 58998795 | 4081825 |       |      |    |      |

peak number

retention time

area

height



(*R*)-3-methyl-3-(4-vinylbenzyl)-2,3-dihydrobenzofuran (**3au**)

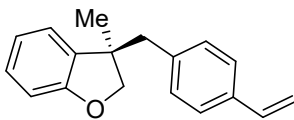

Chemical Formula: C<sub>18</sub>H<sub>18</sub>O

Exact Mass: 250.1358

**3au** was prepared according to general procedure using **1a** and **2u** and was purified by silica gel column chromatography (petroleum ether/EtOAc = 100/1~50/1) to obtain **3au** as colorless oil (49% yield). <sup>1</sup>H NMR (400 MHz, CDCl<sub>3</sub>): δ 7.30 (d, *J* = 8.1 Hz, 2H), 7.14 (ddd, *J* = 7.9, 7.3, 1.5 Hz, 1H), 7.02-6.93 (m, 3H), 6.87 (td, *J* = 7.4, 1.0 Hz, 1H), 6.78 (dt, *J* = 7.9, 0.7 Hz, 1H), 6.70 (dd, *J* = 17.6, 10.9 Hz, 1H), 5.72 (dd, *J* = 17.6, 1.0 Hz, 1H), 5.22 (dd, *J* = 10.9, 0.9 Hz, 1H), 4.50 (d, *J* = 8.7 Hz, 1H), 4.07 (d, *J* = 8.7 Hz, 1H), 2.88 (d, *J* = 4.4 Hz, 2H), 1.36 (s, 3H);

<sup>13</sup>C NMR (101 MHz, CDCl<sub>3</sub>): δ 159.5, 137.2, 136.5, 135.8, 134.7, 130.5, 128.2, 125.8, 123.4, 120.3, 113.4, 109.7, 81.9, 46.3, 46.2, 24.5;

HRMS: (ESI) calcd for C<sub>18</sub>H<sub>18</sub>NaO<sup>+</sup>[M+Na]<sup>+</sup> 273.1250; found 273.1261.

The enantiomeric purity was established by HPLC analysis using a chiral column: AD-H column, 30 °C, *n*-Hexane/*i*-Propanol = 97/3 as eluent, 254 nm, 1 mL/min. tR = 4.1 min (minor), 4.3 min (major).

Optical Rotation: [α]<sub>D</sub><sup>30</sup> -128.8 (c 0.1, CHCl<sub>3</sub>) for 89% ee.

Absolute stereochemistry was determined through analogy with **3aa**.

# <色谱图>

mAU

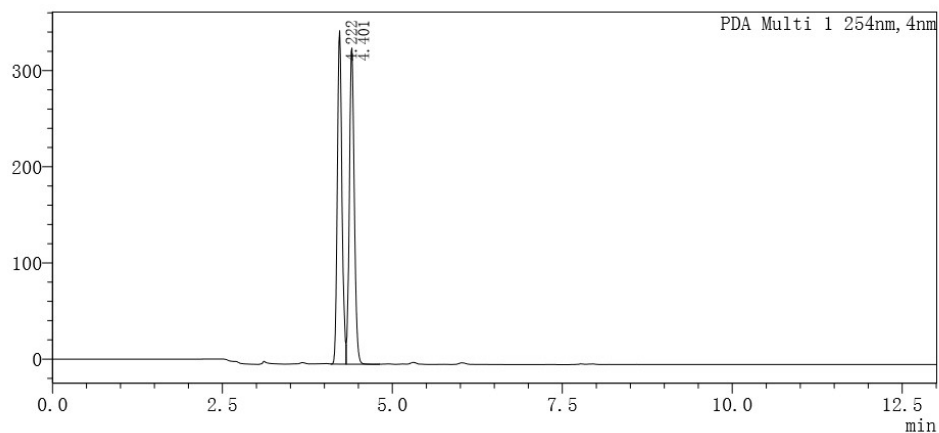

## <峰表>

PDA Ch1 254nm

| 峰号 | 保留时间  | 面积      | 高度     | 浓度    | 浓度单位 | 标记  | 化合物名 |
|----|-------|---------|--------|-------|------|-----|------|
| 1  | 4.222 | 1643483 | 346833 | 0.000 |      | M   |      |
| 2  | 4.401 | 1657365 | 328786 | 0.000 |      | V M |      |
| 总计 |       | 3300849 | 675619 |       |      |     |      |

peak number

area

height

retention time

# <色谱图>

mAU

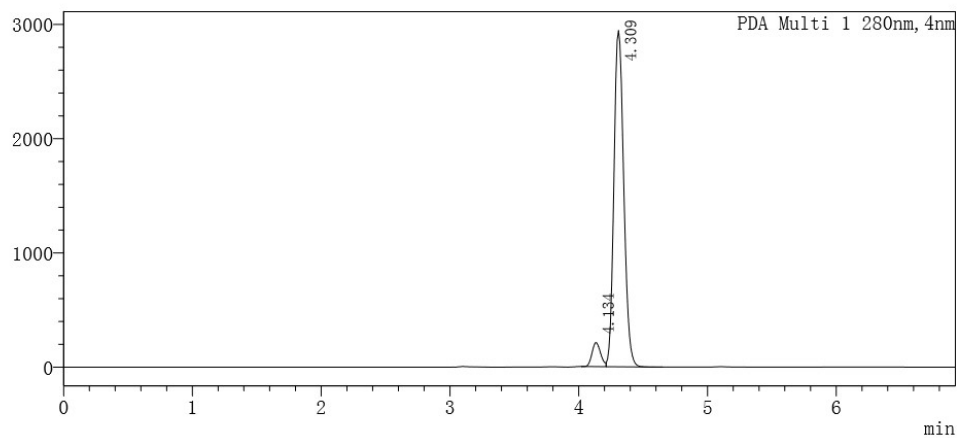

## <峰表>

PDA Ch1 280nm

| 峰号 | 保留时间  | 面积       | 高度      | 浓度    | 浓度单位 | 标记  | 化合物名 |
|----|-------|----------|---------|-------|------|-----|------|
| 1  | 4.134 | 984661   | 210118  | 0.000 |      | M   |      |
| 2  | 4.309 | 15616988 | 2945720 | 0.000 |      | V M |      |
| 总计 |       | 16601649 | 3155839 |       |      |     |      |

peak number

area

height

retention time

(*R*)-3-benzyl-5-(tert-butyl)-3-methyl-2,3-dihydrobenzofuran (**3ba**)

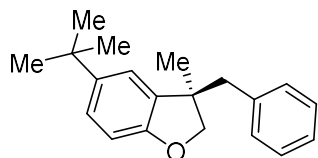

Chemical Formula: C<sub>20</sub>H<sub>24</sub>O

Exact Mass: 280.1827

**3ba** was prepared according to general procedure using **1b** and **2a** and was purified by silica gel column chromatography (petroleum ether/EtOAc = 100/1~20/1) to obtain **3ba** as colorless oil (74% yield). The <sup>1</sup>H NMR data matched those reported in the literature<sup>1</sup>: <sup>1</sup>H NMR (400 MHz, CDCl<sub>3</sub>) δ 7.27-7.22 (m, 3H), 7.17 (dd, *J* = 8.4, 2.2 Hz, 1H), 7.02-6.96 (m, 2H), 6.81 (dd, *J* = 2.2, 0.5 Hz, 1H), 6.72 (dd, *J* = 8.4, 0.5 Hz, 1H), 4.49 (d, *J* = 8.6 Hz, 1H), 4.11 (d, *J* = 8.6 Hz, 1H), 2.89 (s, 2H), 1.36 (s, 3H), 1.28 (s, 9H);

<sup>13</sup>C NMR (101 MHz, CDCl<sub>3</sub>) δ 157.2, 143.0, 137.6, 133.9, 130.5, 127.8, 126.3, 124.8, 120.6, 108.7, 82.7, 46.6, 46.3, 34.3, 31.6, 23.9.

The enantiomeric purity was established by HPLC analysis using a chiral column: IA-H column, 30 °C, *n*-Hexane as eluent, 254 nm, 0.75 mL/min. *t*<sub>R</sub> = 8.2 min (major), 9.0 min (minor).

Optical Rotation: [α]<sub>D</sub><sup>30</sup> -16.2 (c 0.23, CHCl<sub>3</sub>) for 93% ee.

Absolute stereochemistry was determined through analogy with **3aa**.

<色谱图>

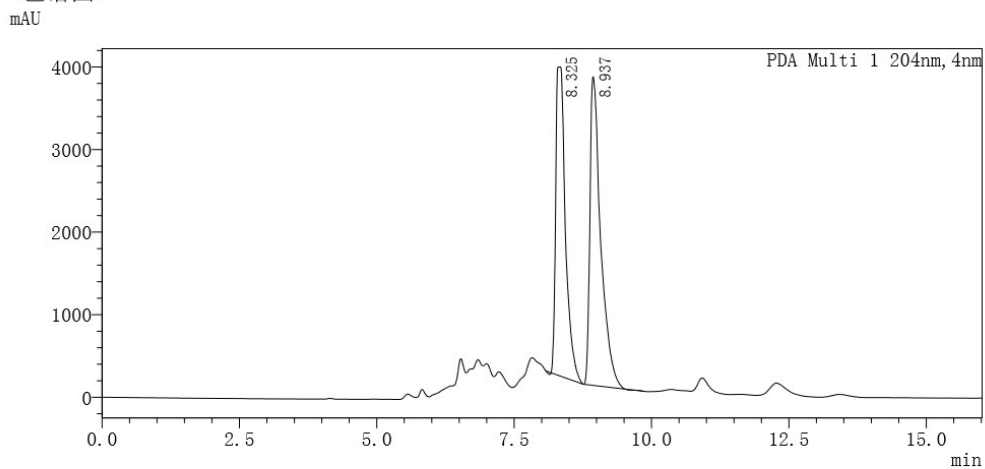

<峰表>

PDA Ch1 204nm

| 峰号 | 保留时间  | 面积       | 高度      | 浓度    | 浓度单位 | 标记 | 化合物名 |
|----|-------|----------|---------|-------|------|----|------|
| 1  | 8.325 | 45894577 | 3739520 | 0.000 |      | M  |      |
| 2  | 8.937 | 51003873 | 3738475 | 0.000 |      | M  |      |
| 总计 |       | 96898449 | 7477994 |       |      |    |      |

peak number

area

height

retention time

<色谱图>

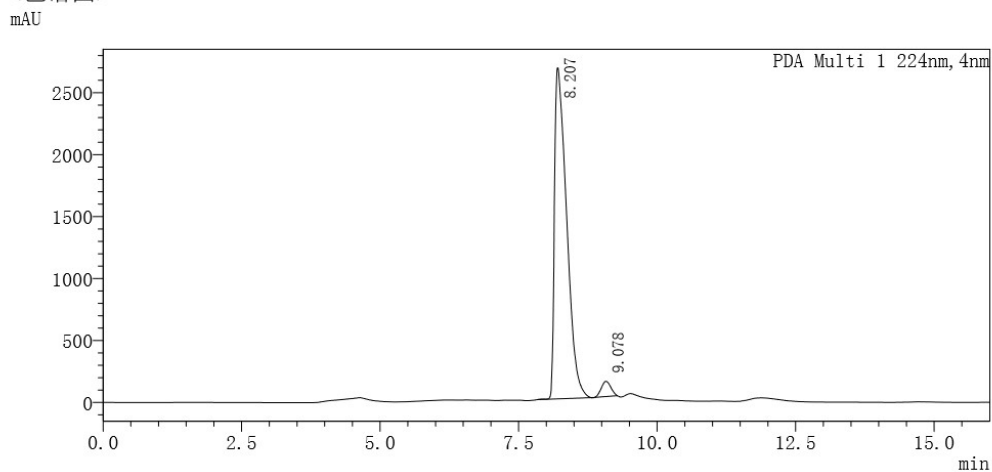

<峰表>

PDA Ch1 224nm

| 峰号 | 保留时间  | 面积       | 高度      | 浓度    | 浓度单位 | 标记 | 化合物名 |
|----|-------|----------|---------|-------|------|----|------|
| 1  | 8.207 | 40663157 | 2672368 | 0.000 |      | M  |      |
| 2  | 9.078 | 1470857  | 123550  | 0.000 |      | M  |      |
| 总计 |       | 42134014 | 2795918 |       |      |    |      |

peak number

area

height

retention time

(*R*)-3-benzyl-3-methyl-5-phenyl-2,3-dihydrobenzofuran (**3ca**)

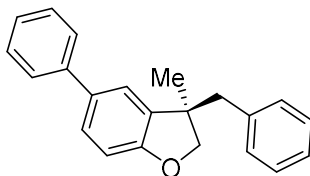

Chemical Formula: C<sub>22</sub>H<sub>20</sub>O

Exact Mass: 300.1514

**3ca** was prepared according to general procedure using **1c** and **2a** and was purified by silica gel column chromatography (petroleum ether/EtOAc = 100/1~20/1) to obtain **3ca** as colorless oil (85% yield). The <sup>1</sup>H NMR data matched those reported in the literature<sup>1</sup>: <sup>1</sup>H NMR (400 MHz, CDCl<sub>3</sub>) δ 7.55-7.49 (m, 2H), 7.46-7.37 (m, 3H), 7.34-7.26 (m, 4H), 7.12 (d, *J* = 2.0 Hz, 1H), 7.08-7.02 (m, 2H), 6.86 (d, *J* = 8.2 Hz, 1H), 4.58 (d, *J* = 8.7 Hz, 1H), 4.15 (d, *J* = 8.7 Hz, 1H), 2.97 (d, *J* = 13.2 Hz, 1H), 2.93 (d, *J* = 13.2 Hz, 1H), 1.42 (s, 3H);

<sup>13</sup>C NMR (101 MHz, CDCl<sub>3</sub>) δ 159.2, 141.4, 137.5, 135.3, 133.8, 130.4, 128.6, 127.9, 127.3, 126.8, 126.5, 126.5, 122.3, 109.8, 82.5, 46.7, 46.3, 24.4.

The enantiomeric purity was established by HPLC analysis using a chiral column: OD-H column, 30 °C, *n*-Hexane/*i*-Propanol = 98/2 as eluent, 254 nm, 1 mL/min. tR = 6.5 min (minor), 7.0 min (major).

Optical Rotation: [α]<sub>D</sub><sup>30</sup> 63.2 (c 0.58, CHCl<sub>3</sub>) for 93% ee.

Absolute stereochemistry was determined through analogy with **3aa**.

<色谱图>  
mAU

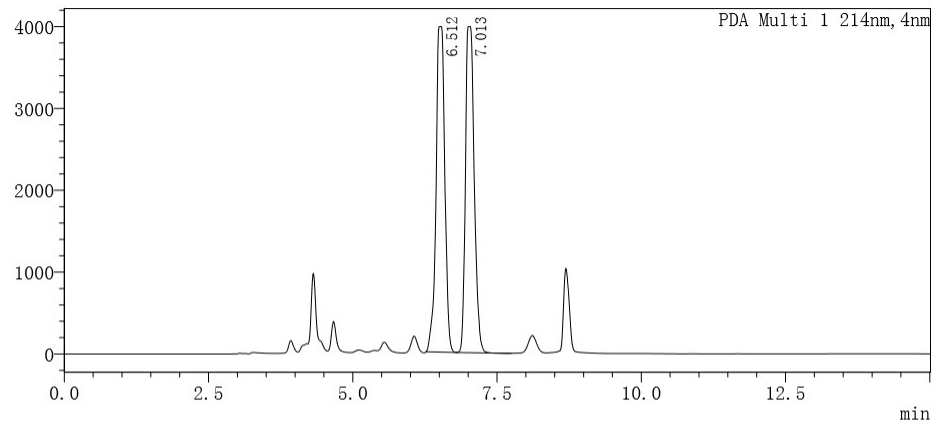

<峰表>

| PDA Ch1 214nm |       |          |         |       |      |    |      |
|---------------|-------|----------|---------|-------|------|----|------|
| 峰号            | 保留时间  | 面积       | 高度      | 浓度    | 浓度单位 | 标记 | 化合物名 |
| 1             | 6.512 | 41622642 | 3976464 | 0.000 |      | M  |      |
| 2             | 7.013 | 41860205 | 3983283 | 0.000 |      | M  |      |
| 总计            |       | 83482847 | 7959748 |       |      |    |      |

peak number

area

height

retention time

<色谱图>  
mAU

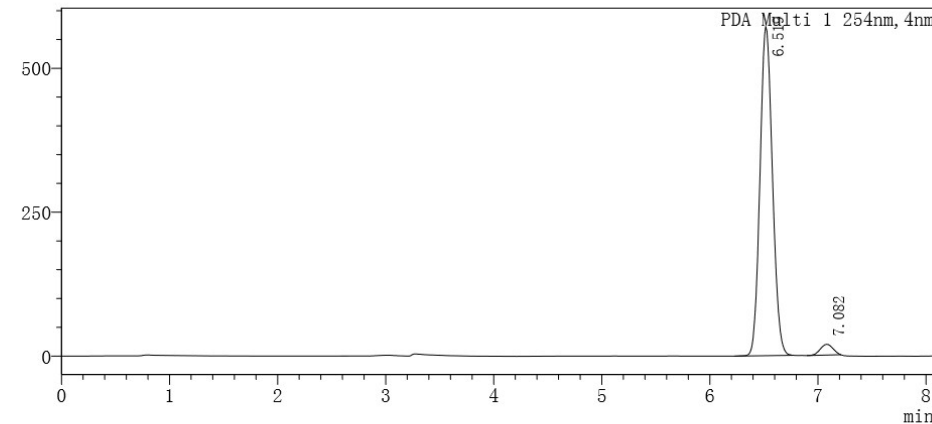

<峰表>

| PDA Ch1 254nm |       |         |        |       |      |    |      |
|---------------|-------|---------|--------|-------|------|----|------|
| 峰号            | 保留时间  | 面积      | 高度     | 浓度    | 浓度单位 | 标记 | 化合物名 |
| 1             | 6.519 | 4583713 | 572119 | 0.000 |      | M  |      |
| 2             | 7.082 | 152124  | 18772  | 0.000 |      | M  |      |
| 总计            |       | 4735838 | 590892 |       |      |    |      |

peak number

area

height

retention time

(*R*)-3-benzyl-5-chloro-3-methyl-2,3-dihydrobenzofuran (**3da**)

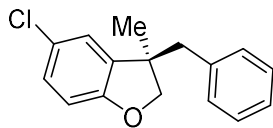

Chemical Formula: C<sub>16</sub>H<sub>15</sub>ClO

Exact Mass: 258.0811

**3da** was prepared according to general procedure using **1d** and **2a** and was purified by silica gel column chromatography (petroleum ether/EtOAc = 100/1~20/1) to obtain **3da** as colorless oil (88% yield). The <sup>1</sup>H NMR data matched those reported in the literature<sup>1</sup>: <sup>1</sup>H NMR (400 MHz, CDCl<sub>3</sub>) δ 7.31-7.21 (m, 3H), 7.09 (dd, *J* = 8.4, 2.3 Hz, 1H), 7.04-6.97 (m, 2H), 6.89 (d, *J* = 2.3 Hz, 1H), 6.68 (d, *J* = 8.5 Hz, 1H), 4.53 (d, *J* = 8.8 Hz, 1H), 4.09 (d, *J* = 8.8 Hz, 1H), 2.90 (d, *J* = 13.3 Hz, 1H), 2.86 (d, *J* = 13.3 Hz, 1H), 1.35 (s, 3H);

<sup>13</sup>C NMR (101 MHz, CDCl<sub>3</sub>) δ 158.2, 137.0, 136.8, 130.3, 128.0, 126.7, 125.0, 123.6, 110.7, 82.3, 46.5, 46.5, 24.5;

The enantiomeric purity was established by HPLC analysis using a chiral column: OD-H column, 30 °C, *n*-Hexane/*i*-Propanol = 99/1 as eluent, 254 nm, 0.5 mL/min. t<sub>R</sub> = 11.8 min (minor), 12.9 min (major).

Optical Rotation: [α]<sub>D</sub><sup>30</sup> 10.0 (c 0.5, CHCl<sub>3</sub>) for 95% ee.

Absolute stereochemistry was determined through analogy with **3aa**.

# <色谱图>

mAU

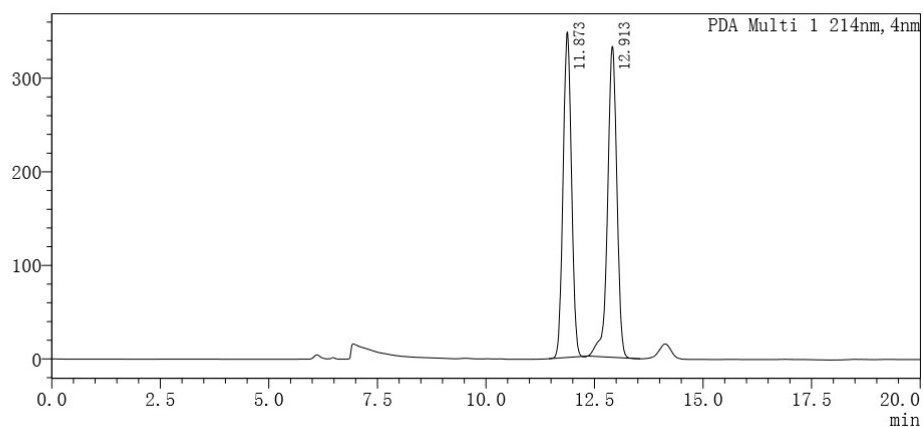

## <峰表>

PDA Ch1 214nm

| 峰号 | 保留时间   | 面积      | 高度     | 浓度    | 浓度单位 | 标记 | 化合物名 |
|----|--------|---------|--------|-------|------|----|------|
| 1  | 11.873 | 4680407 | 347965 | 0.000 |      | M  |      |
| 2  | 12.913 | 4970158 | 332323 | 0.000 |      | M  |      |
| 总计 |        | 9650565 | 680288 |       |      |    |      |

peak number

area

height

retention time

# <色谱图>

mAU

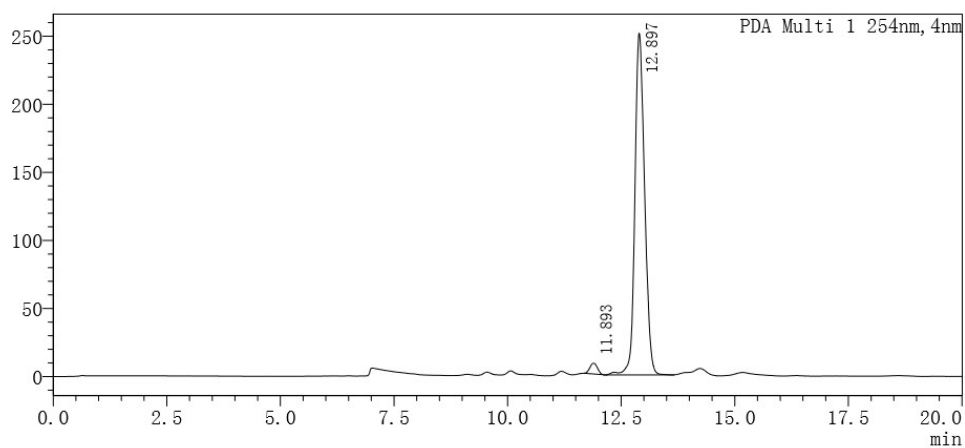

## <峰表>

PDA Ch1 254nm

| 峰号 | 保留时间   | 面积      | 高度     | 浓度    | 浓度单位 | 标记 | 化合物名 |
|----|--------|---------|--------|-------|------|----|------|
| 1  | 11.893 | 90445   | 8026   | 0.000 |      | M  |      |
| 2  | 12.897 | 3740484 | 251170 | 0.000 |      | M  |      |
| 总计 |        | 3830929 | 259196 |       |      |    |      |

peak number

area

height

retention time



(*R*)-3-benzyl-5-bromo-3-methyl-2,3-dihydrobenzofuran (**3ea**)

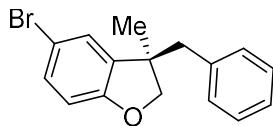

Chemical Formula: C<sub>16</sub>H<sub>15</sub>BrO

Exact Mass: 302.0306

**3ea** was prepared according to general procedure using **1e** and **2a** and was purified by silica gel column chromatography (petroleum ether/EtOAc = 100/1~20/1) to obtain **3ea** as colorless oil (69% yield). <sup>1</sup>H NMR (400 MHz, CDCl<sub>3</sub>) δ 7.31-7.20 (m, 4H), 7.06-6.96 (m, 3H), 6.64 (d, *J* = 8.4 Hz, 1H), 4.52 (d, *J* = 8.8 Hz, 1H), 4.08 (d, *J* = 8.8 Hz, 1H), 2.90 (d, *J* = 13.3 Hz, 1H), 2.84 (d, *J* = 13.3 Hz, 1H), 1.35 (s, 3H);

<sup>13</sup>C NMR (101 MHz, CDCl<sub>3</sub>) δ 158.7, 137.3, 137.0, 130.9, 130.3, 128.0, 126.7, 126.5, 112.1, 111.3, 82.3, 46.55, 46.51, 24.5;

HRMS: (ESI) calcd for C<sub>16</sub>H<sub>15</sub>BrNaO<sup>+</sup>[M+Na]<sup>+</sup> 325.0198; found 325.0199.

The enantiomeric purity was established by HPLC analysis using a chiral column: OD-H column, 30 °C, *n*-Hexane/*i*-Propanol = 98/2 as eluent, 254 nm, 1 mL/min. tR = 5.5 min (minor), 6.0 min (major).

Optical Rotation: [α]<sub>D</sub><sup>30</sup> 33.5(c 0.33, CHCl<sub>3</sub>) for 96% ee.

Absolute stereochemistry was determined through analogy with **3aa**.

<色谱图>

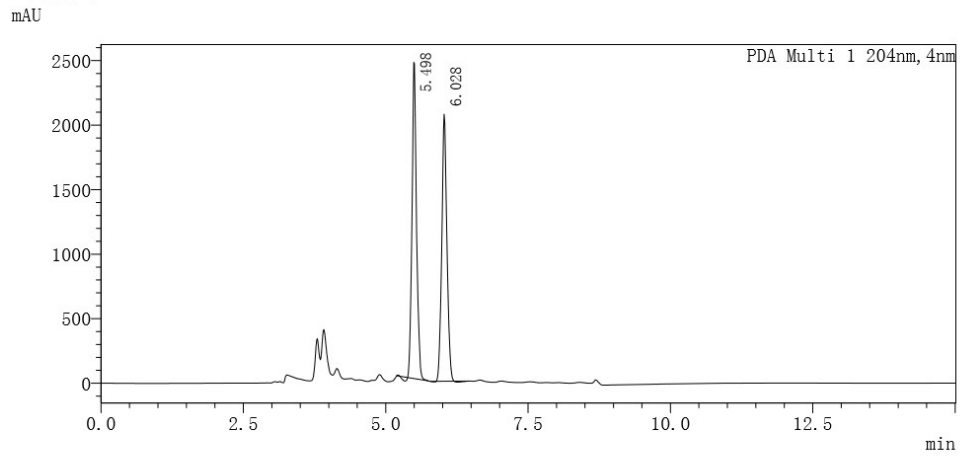

<峰表>

PDA Ch1 204nm

| 峰号 | 保留时间  | 面积       | 高度      | 浓度    | 浓度单位 | 标记 | 化合物名 |
|----|-------|----------|---------|-------|------|----|------|
| 1  | 5.498 | 13247978 | 2450498 | 0.000 |      | M  |      |
| 2  | 6.028 | 12804997 | 2070537 | 0.000 |      | M  |      |
| 总计 |       | 26052975 | 4521035 |       |      |    |      |

peak number

retention time

area

height

<色谱图>

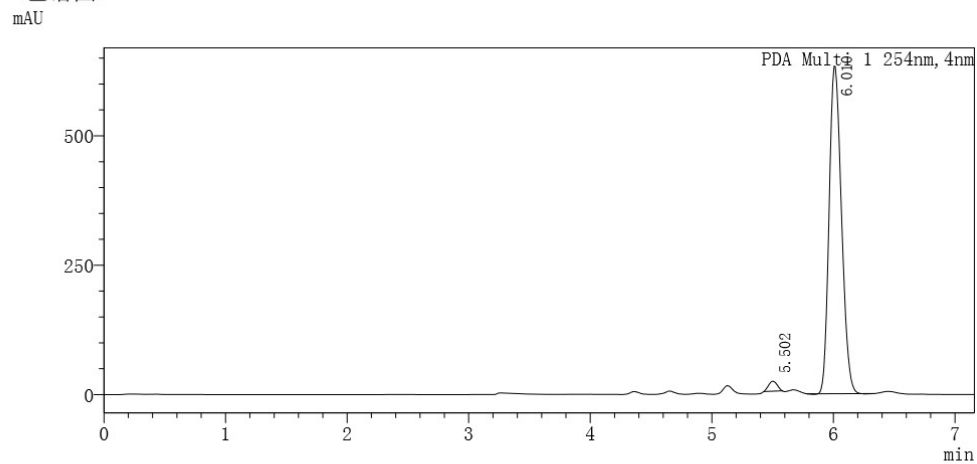

<峰表>

PDA Ch1 254nm

| 峰号 | 保留时间  | 面积      | 高度     | 浓度    | 浓度单位 | 标记 | 化合物名 |
|----|-------|---------|--------|-------|------|----|------|
| 1  | 5.502 | 95340   | 19300  | 0.000 |      | M  |      |
| 2  | 6.010 | 4472119 | 633166 | 0.000 |      | M  |      |
| 总计 |       | 4567459 | 652466 |       |      |    |      |

peak number

retention time

area

height

(*R*)-3-benzyl-5-fluoro-3-methyl-2,3-dihydrobenzofuran (**3fa**)

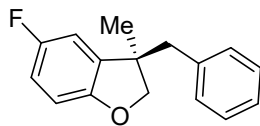

Chemical Formula: C<sub>16</sub>H<sub>15</sub>FO

Exact Mass: 242.1107

**3fa** was prepared according to general procedure using **1f** and **2a** and was purified by silica gel column chromatography (petroleum ether/EtOAc = 100/1~20/1) to obtain **3fa** as colorless oil (69% yield). The <sup>1</sup>H NMR data matched those reported in the literature<sup>1</sup>: <sup>1</sup>H NMR (400 MHz, CDCl<sub>3</sub>) δ 7.30-7.21 (m, 3H), 7.04-6.97 (m, 2H), 6.85-6.76 (m, 1H), 6.69-6.60 (m, 2H), 4.52 (d, *J* = 8.7 Hz, 1H), 4.09 (d, *J* = 8.7 Hz, 1H), 2.90 (d, *J* = 13.3 Hz, 1H), 2.85 (d, *J* = 13.3 Hz, 1H), 1.35 (s, 3H);

<sup>13</sup>C NMR (101 MHz, CDCl<sub>3</sub>) δ 157.4 (d, *J* = 237.0 Hz), 155.4, 137.1, 136.3 (d, *J* = 7.6 Hz), 130.3, 128.0, 126.6, 114.3 (d, *J* = 24.2 Hz), 110.5 (d, *J* = 24.6 Hz), 109.8 (d, *J* = 8.5 Hz), 82.5, 46.7, 46.4, 24.4;

<sup>19</sup>F NMR (376 MHz, CDCl<sub>3</sub>) δ -124.03;

The enantiomeric purity was established by HPLC analysis using a chiral column: OD-H column, 30 °C, *n*-Hexane/*i*-Propanol = 99/1 as eluent, 254 nm, 0.5 mL/min. t<sub>R</sub> = 12.7 min (minor), 13.2 min (major).

Optical Rotation: [α]<sub>D</sub><sup>30</sup> -29.9 (c 0.4, CHCl<sub>3</sub>) for 96% ee.

Absolute stereochemistry was determined through analogy with **3aa**.

<色谱图>

mAU

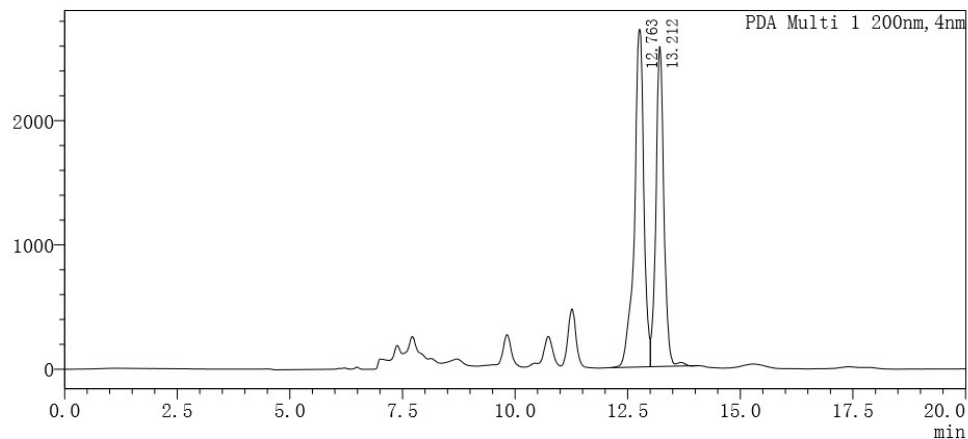

<峰表>

PDA Ch1 200nm

| 峰号 | 保留时间   | 面积       | 高度      | 浓度    | 浓度单位 | 标记  | 化合物名 |
|----|--------|----------|---------|-------|------|-----|------|
| 1  | 12.763 | 39557409 | 2718128 | 0.000 |      | M   |      |
| 2  | 13.212 | 31664985 | 2575854 | 0.000 |      | V M |      |
| 总计 |        | 71222394 | 5293982 |       |      |     |      |

peak number

area

height

retention time

<色谱图>

mAU

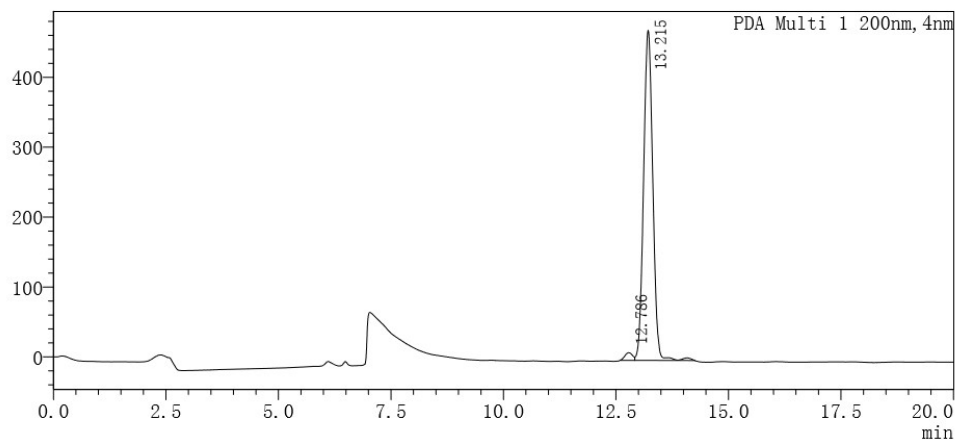

<峰表>

PDA Ch1 200nm

| 峰号 | 保留时间   | 面积      | 高度     | 浓度    | 浓度单位 | 标记  | 化合物名 |
|----|--------|---------|--------|-------|------|-----|------|
| 1  | 12.786 | 131627  | 11169  | 0.000 |      | M   |      |
| 2  | 13.215 | 6718412 | 472298 | 0.000 |      | V M |      |
| 总计 |        | 6850038 | 483467 |       |      |     |      |

peak number

area

height

retention time

(*R*)-3-benzyl-3,6-dimethyl-2,3-dihydrobenzofuran (**3ga**)

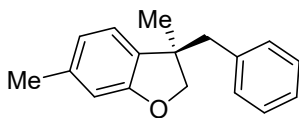

Chemical Formula: C<sub>17</sub>H<sub>18</sub>O

Exact Mass: 238.1358

**3ga** was prepared according to general procedure using **1g** and **2a** and was purified by silica gel column chromatography (petroleum ether/EtOAc = 100/1~20/1) to obtain **3ga** as colorless oil (76% yield). <sup>1</sup>H NMR (400 MHz, CDCl<sub>3</sub>) δ 7.30-7.20 (m, 3H), 7.07-7.01 (m, 2H), 6.83 (d, *J* = 7.5 Hz, 1H), 6.69 (m, 1H), 6.62 (m, 1H), 4.50 (d, *J* = 8.7 Hz, 1H), 4.06 (d, *J* = 8.7 Hz, 1H), 2.90 (d, *J* = 13.3 Hz, 1H), 2.86 (d, *J* = 13.3 Hz, 1H), 2.33 (s, 3H), 1.34 (s, 3H);

<sup>13</sup>C NMR (101 MHz, CDCl<sub>3</sub>) δ 159.7, 138.3, 137.7, 131.9, 130.4, 127.9, 126.4, 122.9, 121.0, 110.4, 82.2, 46.6, 45.9, 24.6, 21.5;

HRMS: (ESI) calcd for C<sub>17</sub>H<sub>18</sub>NaO<sup>+</sup>[M+Na]<sup>+</sup> 261.1250; found 261.1276.

The enantiomeric purity was established by HPLC analysis using a chiral column: OD-H column, 30 °C, *n*-Hexane/*i*-Propanol = 99.5/0.5 as eluent, 254 nm, 0.5 mL/min. tR = 10.6 min (major), 11.2 min (minor).

Optical Rotation: [α]<sub>D</sub><sup>30</sup> -11.6 (c 0.38, CHCl<sub>3</sub>) for 93% ee.

Absolute stereochemistry was determined through analogy with **3aa**.

<色谱图>

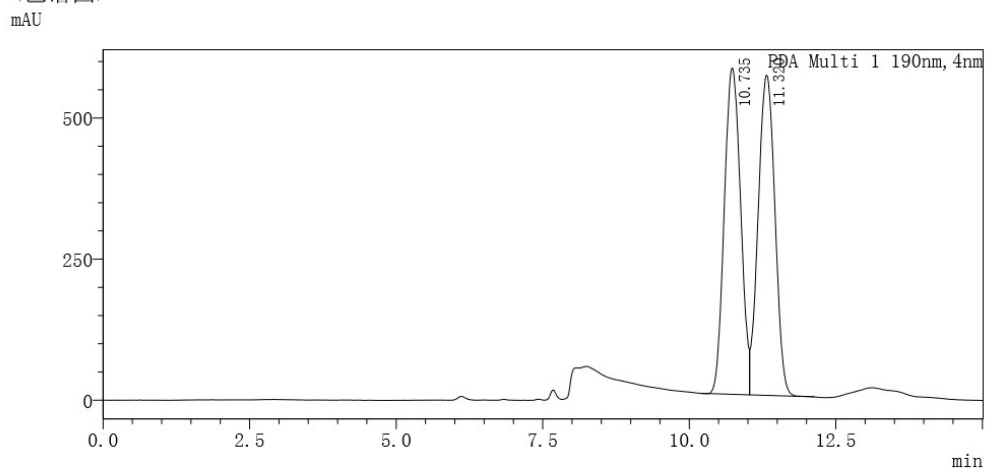

<峰表>

| 峰号 | 保留时间   | 面积       | 高度      | 浓度    | 浓度单位 | 标记  | 化合物名 |
|----|--------|----------|---------|-------|------|-----|------|
| 1  | 10.735 | 11225019 | 578119  | 0.000 |      | M   |      |
| 2  | 11.320 | 11307822 | 567462  | 0.000 |      | V M |      |
| 总计 |        | 22532840 | 1145581 |       |      |     |      |

peak number

area

height

retention time

<色谱图>

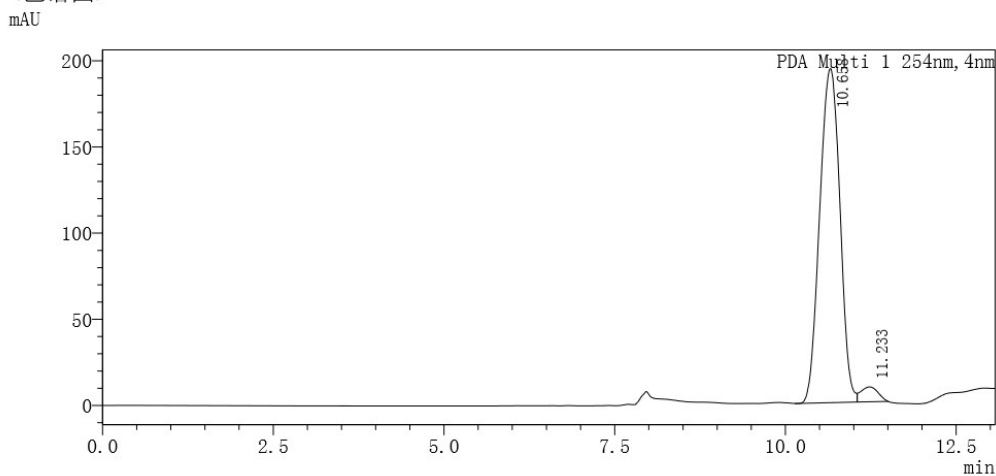

<峰表>

| 峰号 | 保留时间   | 面积      | 高度     | 浓度    | 浓度单位 | 标记  | 化合物名 |
|----|--------|---------|--------|-------|------|-----|------|
| 1  | 10.658 | 3998661 | 193927 | 0.000 |      | M   |      |
| 2  | 11.233 | 150595  | 8640   | 0.000 |      | V M |      |
| 总计 |        | 4149257 | 202567 |       |      |     |      |

peak number

area

height

retention time

(*R*)-3-benzyl-6-chloro-3-methyl-2,3-dihydrobenzofuran (**3ha**)

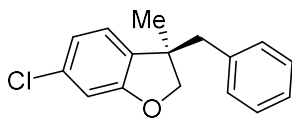

Chemical Formula: C<sub>16</sub>H<sub>15</sub>ClO

Exact Mass: 258.0811

**3ha** was prepared according to general procedure using **1h** and **2a** and was purified by silica gel column chromatography (petroleum ether/EtOAc = 100/1~20/1) to obtain **3ha** as colorless oil (80% yield). The <sup>1</sup>H NMR data matched those reported in the literature<sup>1</sup>: <sup>1</sup>H NMR (400 MHz, CDCl<sub>3</sub>) δ 7.29-7.21 (m, 3H), 7.04-6.95 (m, 2H), 6.88-6.73 (m, 3H), 4.53 (d, *J* = 8.7 Hz, 1H), 4.11 (d, *J* = 8.7 Hz, 1H), 2.89 (d, *J* = 13.2 Hz, 1H), 2.85 (d, *J* = 13.2 Hz, 1H), 1.35 (s, 3H);

<sup>13</sup>C NMR (101 MHz, CDCl<sub>3</sub>) δ 160.4, 137.1, 133.4, 130.3, 128.0, 126.6, 124.0, 120.3, 110.4, 82.7, 46.5, 45.9, 24.5;

The enantiomeric purity was established by HPLC analysis using a chiral column: OD-H column, 30 °C, *n*-Hexane/*i*-Propanol = 99/1 as eluent, 254 nm, 0.5 mL/min. t<sub>R</sub> = 12.8 min (major), 13.2 min (minor).

Optical Rotation: [α]<sub>D</sub><sup>30</sup> -41.9 (c 0.25, CHCl<sub>3</sub>) for 94% ee.

Absolute stereochemistry was determined through analogy with **3aa**.

<色谱图>

mAU

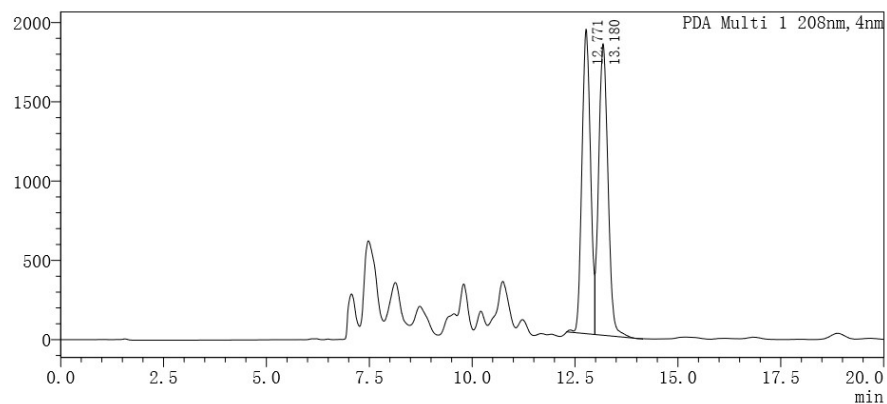

<峰表>

PDA Ch1 208nm

| 峰号 | 保留时间   | 面积       | 高度      | 浓度     | 浓度单位 | 标记  | 化合物名 |
|----|--------|----------|---------|--------|------|-----|------|
| 1  | 12.771 | 27830524 | 1921293 | 48.978 |      | M   |      |
| 2  | 13.180 | 28991975 | 1839093 | 51.022 |      | V M |      |
| 总计 |        | 56822499 | 3760386 |        |      |     |      |

peak number

area

height

retention time

<色谱图>

mAU

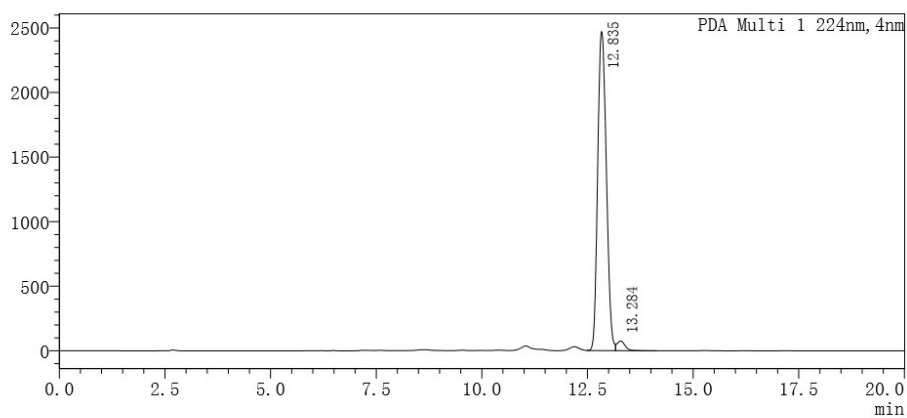

<峰表>

PDA Ch1 224nm

| 峰号 | 保留时间   | 面积       | 高度      | 浓度    | 浓度单位 | 标记  | 化合物名 |
|----|--------|----------|---------|-------|------|-----|------|
| 1  | 12.835 | 35277167 | 2471813 | 0.000 |      | M   |      |
| 2  | 13.284 | 987039   | 74610   | 0.000 |      | V M |      |
| 总计 |        | 36264206 | 2546423 |       |      |     |      |

peak number

area

height

retention time



(*S*)-3-methyl-3-((*E*)-3-(4-(((*R*)-3-methyl-2,3-dihydrobenzofuran-3-yl)methyl)phenyl)allyl)-2,3-dihydrobenzofuran (**4aa**)

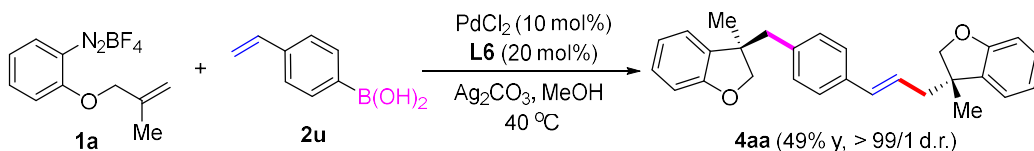

**4aa** was prepared according to general procedure using **1a** (0.4 mmol, 104.8 mg) and **2u** (0.1 mmol, 14.9 mg) and was purified by silica gel column chromatography (petroleum ether/EtOAc = 100/1~30/1) to obtain **4aa** as colorless oil (17.4 mg, 44% yield).

<sup>1</sup>H NMR (400 MHz, CDCl<sub>3</sub>): δ 7.25-7.11 (m, 5H), 7.01-6.87 (m, 5H), 6.81 (ddt, *J* = 15.5, 8.0, 0.7 Hz, 2H), 6.50-6.35 (m, 1H), 6.09 (dt, *J* = 15.7, 7.5 Hz, 1H), 4.51 (d, *J* = 8.7 Hz, 1H), 4.46 (d, *J* = 8.7 Hz, 1H), 4.18 (d, *J* = 8.6 Hz, 1H), 4.08 (d, *J* = 8.7 Hz, 1H), 3.05-2.80 (m, 2H), 2.53 (dd, *J* = 7.6, 1.3 Hz, 2H), 1.42 (s, 3H), 1.38 (s, 3H);

<sup>13</sup>C NMR (101 MHz, CDCl<sub>3</sub>): δ 159.5, 136.7, 135.5, 134.9, 134.8, 133.1, 130.5, 128.2, 125.7, 125.2, 123.3, 122.9, 120.5, 120.3, 109.7, 82.0, 81.8, 46.3, 46.3, 45.6, 44.2, 25.0, 24.6;

HRMS: (ESI) calcd for C<sub>28</sub>H<sub>28</sub>NaO<sub>2</sub><sup>+</sup>[M+Na]<sup>+</sup> 419.1982; found 419.1971;

The enantiomeric purity was established by HPLC analysis using a chiral column: OJ-H column, 30 °C, *n*-Hexane/*i*-Propanol = 95/5 as eluent, 254 nm, 1 mL/min. tR = 27.3 min, 32.5 min, 35.4 min, 39.2 min.

Optical Rotation: [α]<sub>D</sub><sup>30</sup> -24.1 (c 0.4, CHCl<sub>3</sub>) for 92% ee.

Absolute stereochemistry was determined through analogy with **3aa**.

<色谱图>

mAU

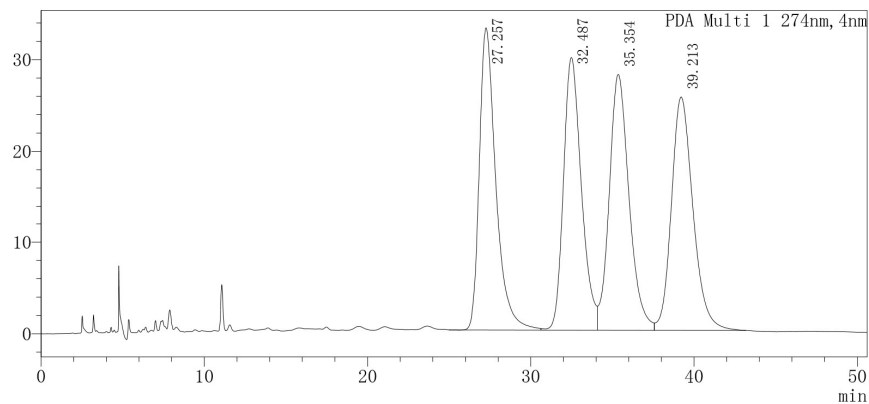

<峰表>

PDA Ch1 274nm

| 峰号 | 保留时间   | 面积      | 高度     | 浓度     | 浓度单位 | 标记  | 化合物名 |
|----|--------|---------|--------|--------|------|-----|------|
| 1  | 27.257 | 2322186 | 33055  | 24.941 |      | M   |      |
| 2  | 32.487 | 2275318 | 29847  | 24.438 |      | V M |      |
| 3  | 35.354 | 2362690 | 28005  | 25.376 |      | V M |      |
| 4  | 39.213 | 2350467 | 25566  | 25.245 |      | V M |      |
| 总计 |        | 9310661 | 116473 |        |      |     |      |

peak number

retention time

area

height

<色谱图>

mAU

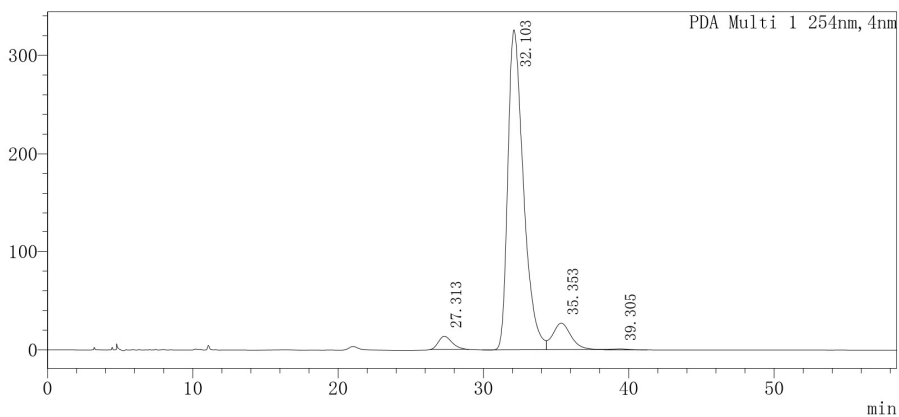

<峰表>

PDA Ch1 254nm

| 峰号 | 保留时间   | 面积       | 高度     | 浓度    | 浓度单位 | 标记  | 化合物名 |
|----|--------|----------|--------|-------|------|-----|------|
| 1  | 27.313 | 874348   | 13405  | 0.000 |      | M   |      |
| 2  | 32.103 | 24316349 | 325782 | 0.000 |      | M   |      |
| 3  | 35.353 | 2354198  | 26912  | 0.000 |      | V M |      |
| 4  | 39.305 | 104516   | 1125   | 0.000 |      | M   |      |
| 总计 |        | 27649410 | 367224 |       |      |     |      |

peak number

retention time

area

height

(*S*)-5-chloro-3-methyl-3-((*E*)-3-(4-(((*R*)-3-methyl-2,3-dihydrobenzofuran-3-yl)methyl)phenyl)allyl)-2,3-dihydrobenzofuran (**4ah**)

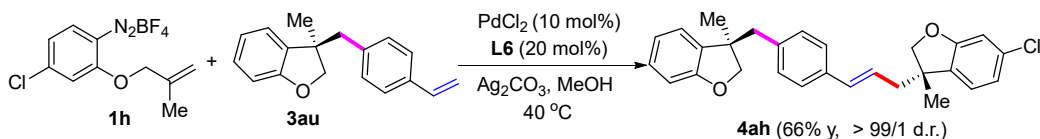

**4ah** was prepared according to general procedure using **3au** (0.1 mmol, 25.0 mg) and **1h** (0.2 mmol, 60.0 mg) and was purified by silica gel column chromatography (petroleum ether/EtOAc = 100/1~30/1) to obtain **4ah** as colorless oil (28.4 mg, 66% yield).

$^1\text{H}$  NMR (400 MHz,  $\text{CDCl}_3$ ):  $\delta$  7.22-7.09 (m, 3H), 7.00 (d,  $J$  = 7.9 Hz, 1H), 6.98-6.90 (m, 3H), 6.89-6.84 (m, 2H), 6.80-6.73 (m, 2H), 6.37 (d,  $J$  = 15.6 Hz, 1H), 6.03 (dt,  $J$  = 15.4, 7.5 Hz, 1H), 4.47 (t,  $J$  = 8.5 Hz, 2H), 4.18 (d,  $J$  = 8.7 Hz, 1H), 4.06 (d,  $J$  = 8.7 Hz, 1H), 2.86 (d,  $J$  = 5.8 Hz, 2H), 2.47 (dt,  $J$  = 7.7, 1.5 Hz, 2H), 1.38 (s, 3H), 1.35 (s, 3H);

$^{13}\text{C}$  NMR (400 MHz,  $\text{CDCl}_3$ ):  $\delta$  160.5, 159.6, 136.9, 135.5, 134.8, 133.7, 133.6, 130.7, 128.3, 125.8, 124.8, 123.6, 123.4, 120.7, 120.4, 110.6, 109.8, 82.8, 81.9, 46.4, 46.4, 45.5, 44.3, 25.2, 24.7;

HRMS: (APCI) calcd for  $\text{C}_{28}\text{H}_{28}\text{ClO}_2^+[\text{M}+\text{H}]^+$  431.1772; found 431.1766;

The enantiomeric purity was established by HPLC analysis using a chiral column: AD-H column, 30 °C, *n*-Hexane/*i*-Propanol = 95/5 as eluent, 254 nm, 0.5 mL/min.  $t_R$  = 12.7 min, 13.0 min, 13.4 min, 14.0 min.

Optical Rotation:  $[\alpha]_D^{30}$  -32.6 (c 0.2,  $\text{CHCl}_3$ ) for 92% ee.

Absolute stereochemistry was determined through analogy with **3aa**.

<色谱图>  
mAU

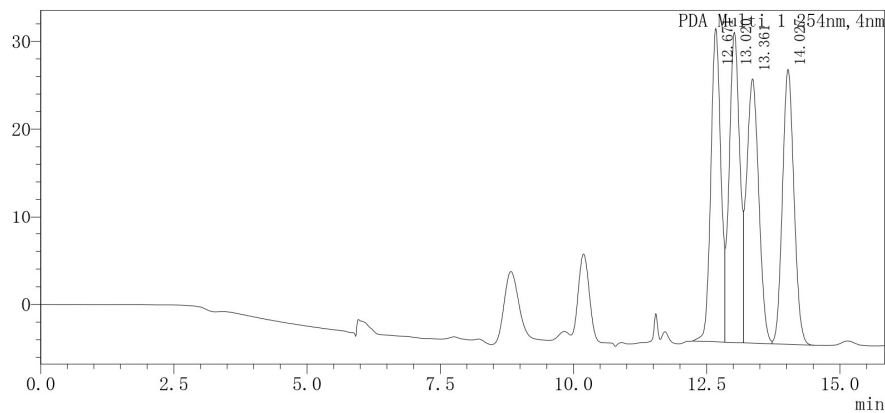

<峰表>

| 峰号 | 保留时间   | 面积      | 高度     | 浓度     | 浓度单位 | 标记  | 化合物名 |
|----|--------|---------|--------|--------|------|-----|------|
| 1  | 12.671 | 466840  | 35749  | 24.440 |      | M   |      |
| 2  | 13.020 | 497663  | 35361  | 26.054 |      | V M |      |
| 3  | 13.361 | 474674  | 30121  | 24.851 |      | V M |      |
| 4  | 14.027 | 470933  | 31360  | 24.655 |      | V M |      |
| 总计 |        | 1910110 | 132590 |        |      |     |      |

peak number

retention time

area

height

<色谱图>  
mAU

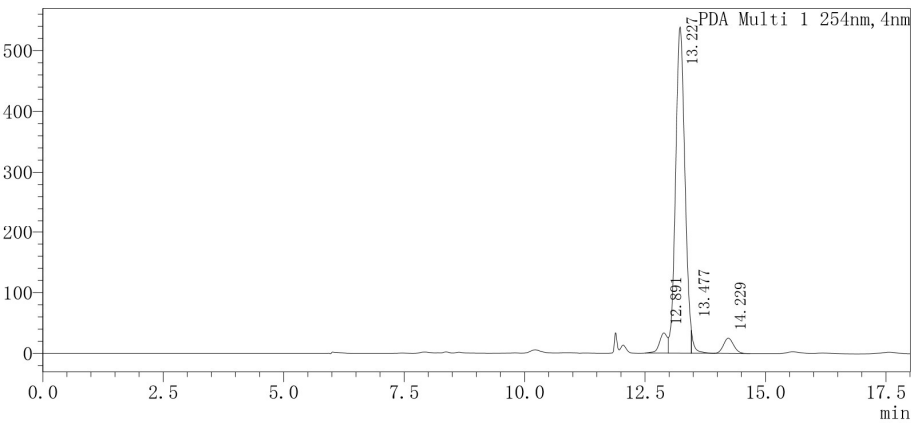

<峰表>

| 峰号 | 保留时间   | 面积      | 高度     | 浓度    | 浓度单位 | 标记  | 化合物名 |
|----|--------|---------|--------|-------|------|-----|------|
| 1  | 12.891 | 383968  | 33240  | 0.000 |      | M   |      |
| 2  | 13.227 | 7252663 | 538845 | 0.000 |      | V M |      |
| 3  | 13.477 | 127849  | 30860  | 0.000 |      | V M |      |
| 4  | 14.229 | 368805  | 25067  | 0.000 |      | M   |      |
| 总计 |        | 8133286 | 628012 |       |      |     |      |

peak number

retention time

area

height

## 5. Copies of the $^1\text{H}$ , $^{13}\text{C}$ and $^{19}\text{F}$ NMR spectra

**3aa**

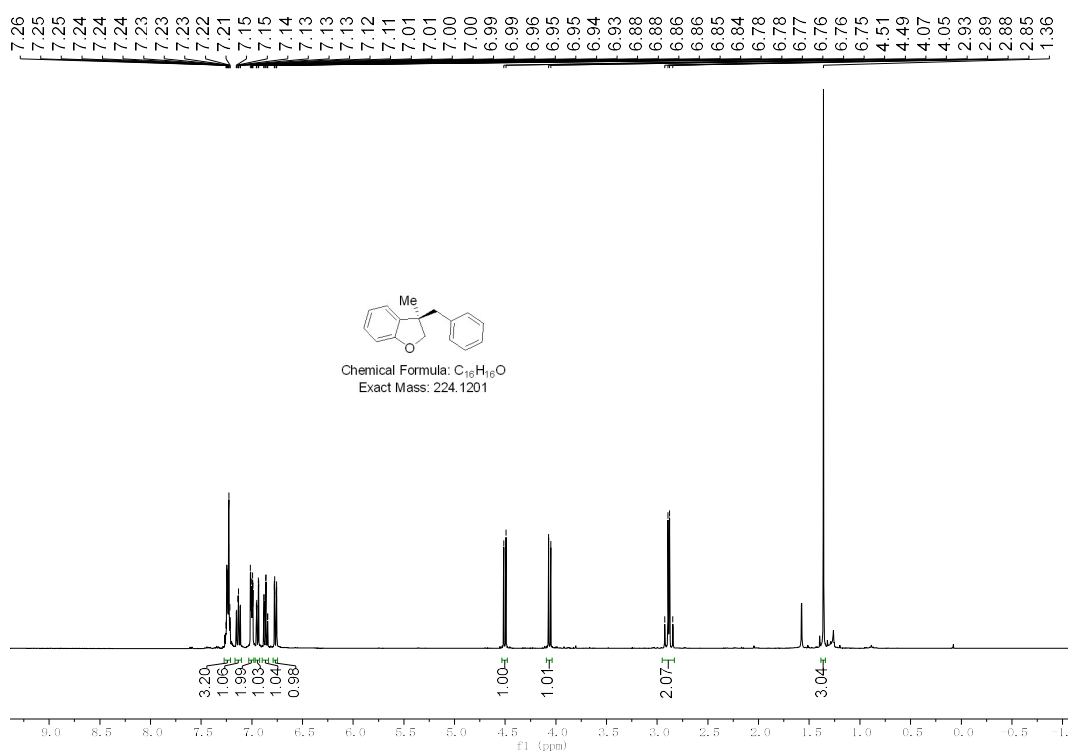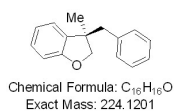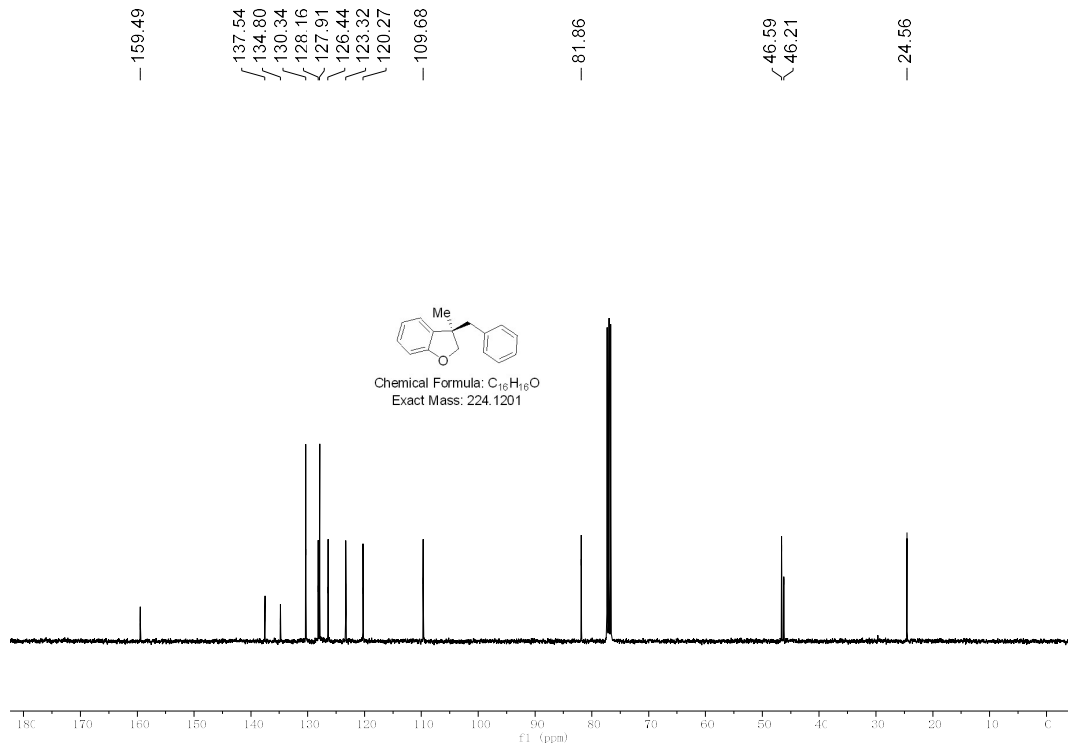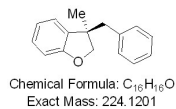

3ab

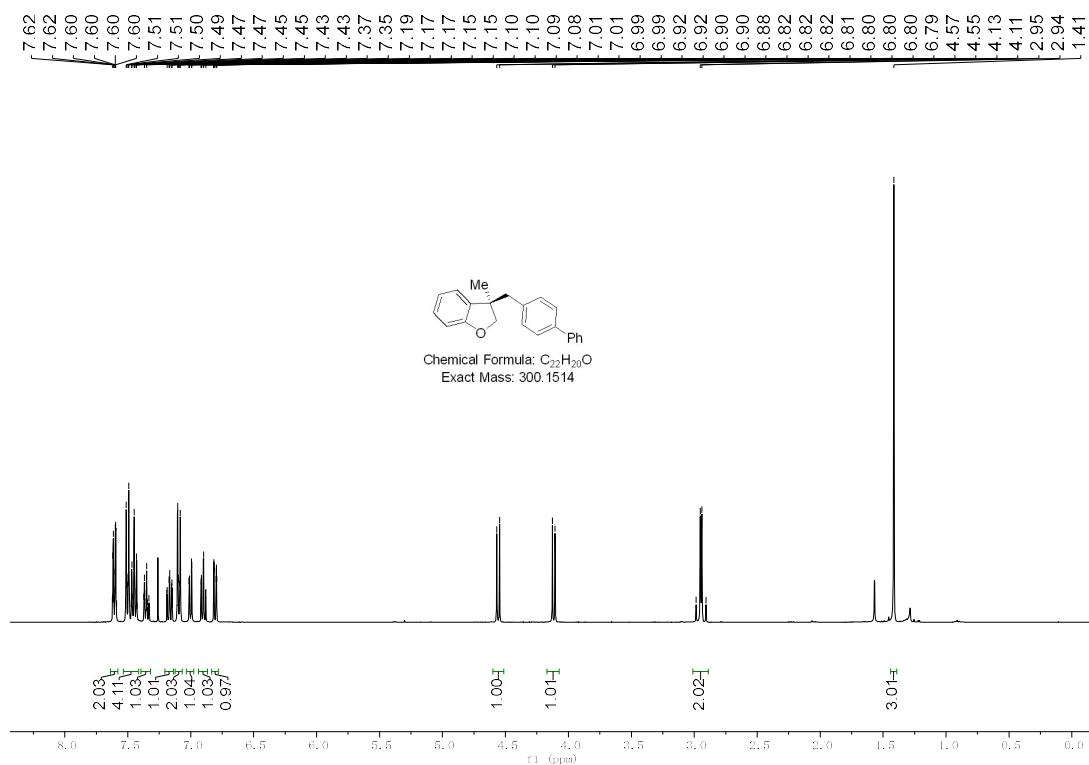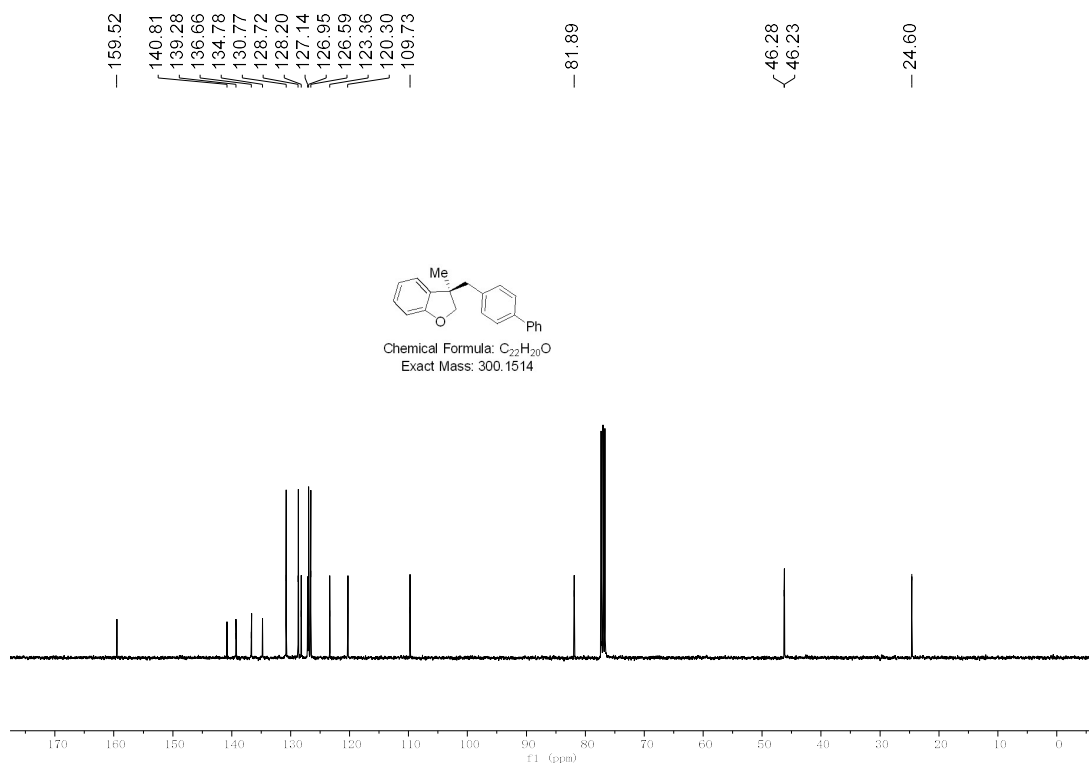

3ac

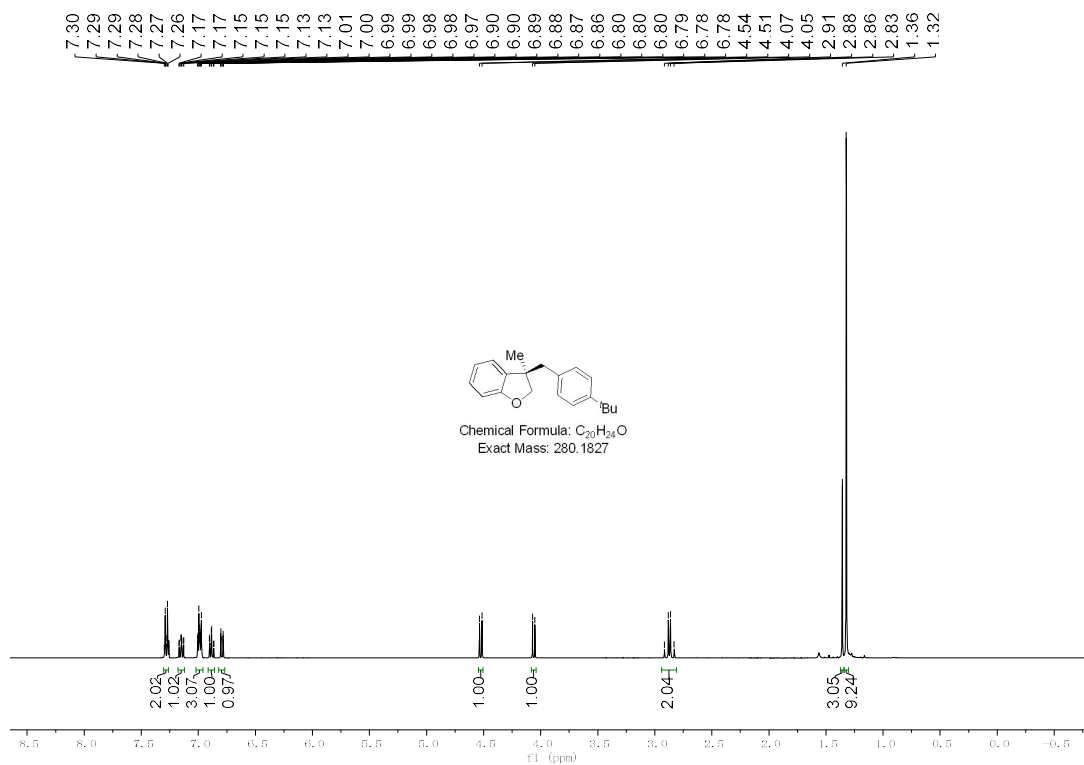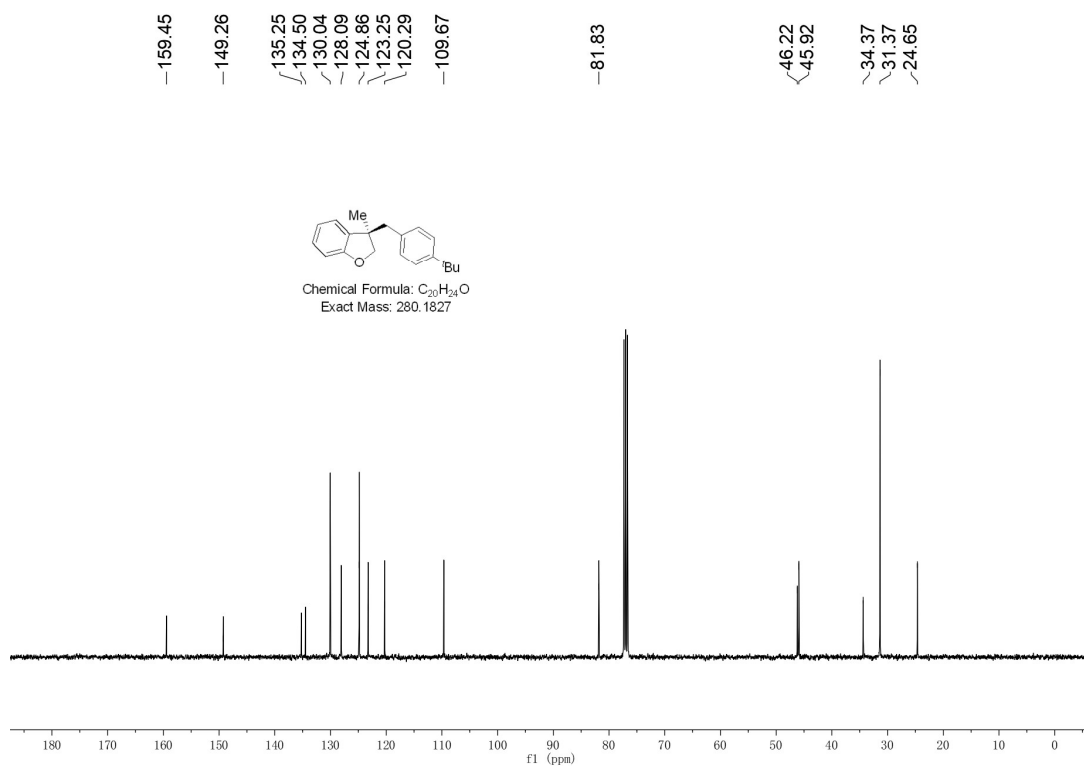

3ad

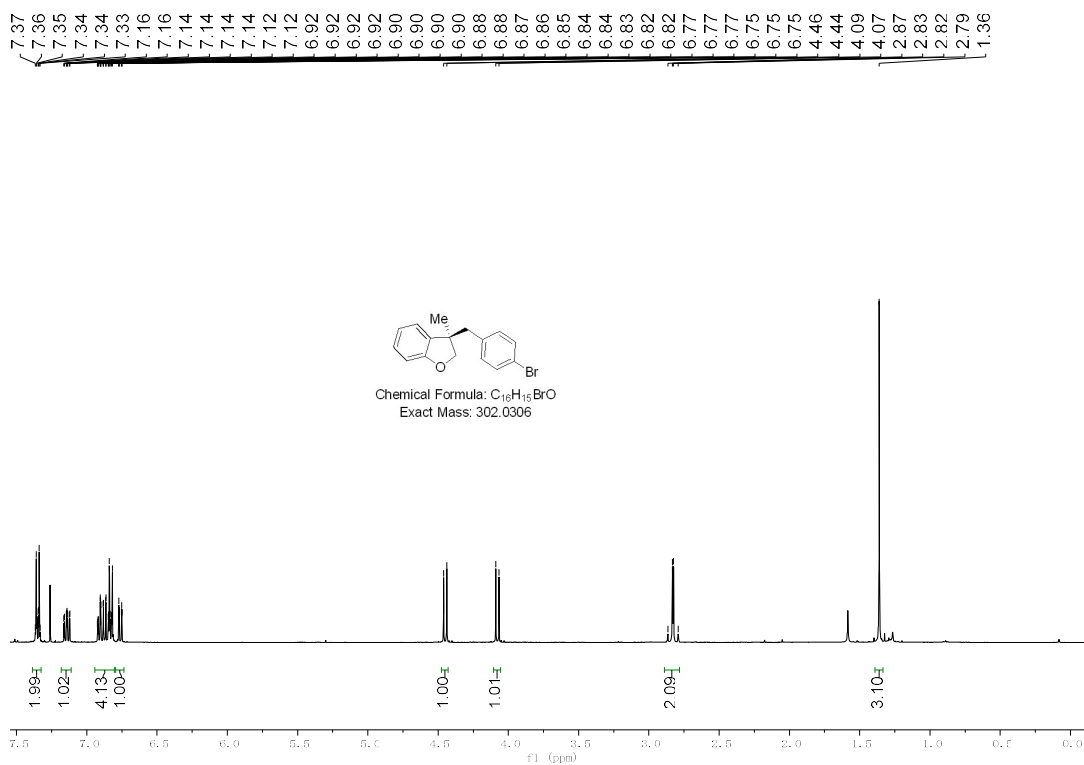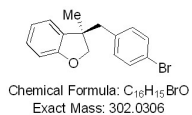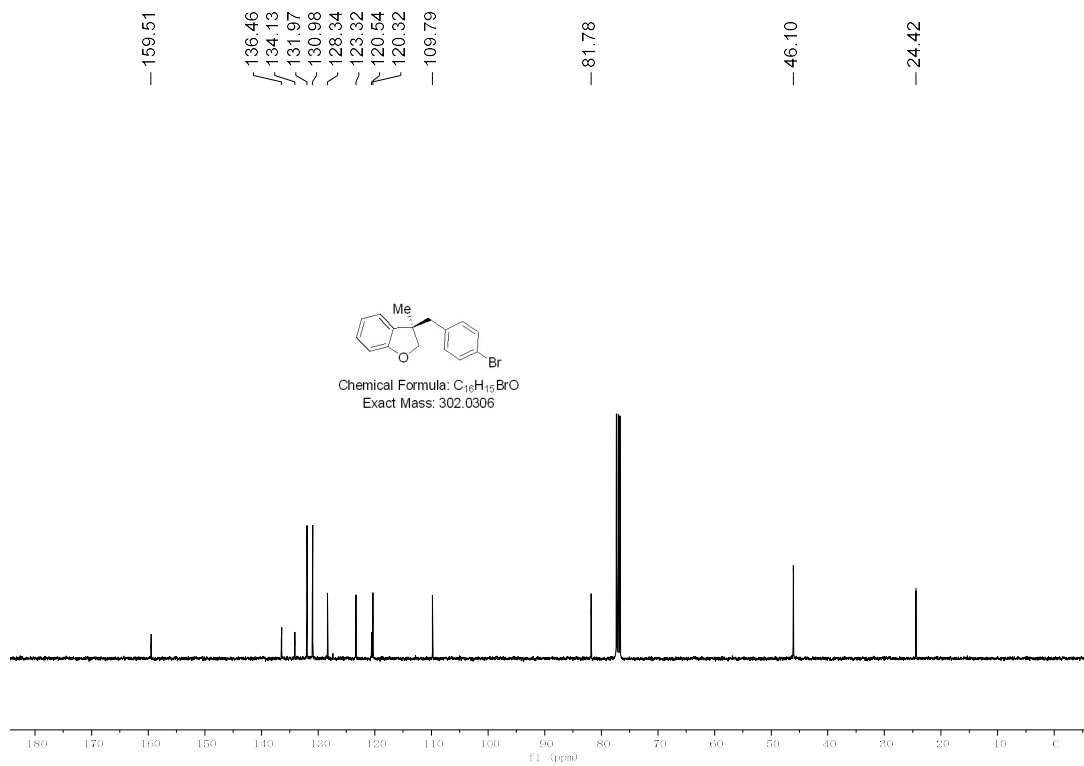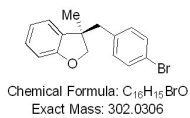



3ae

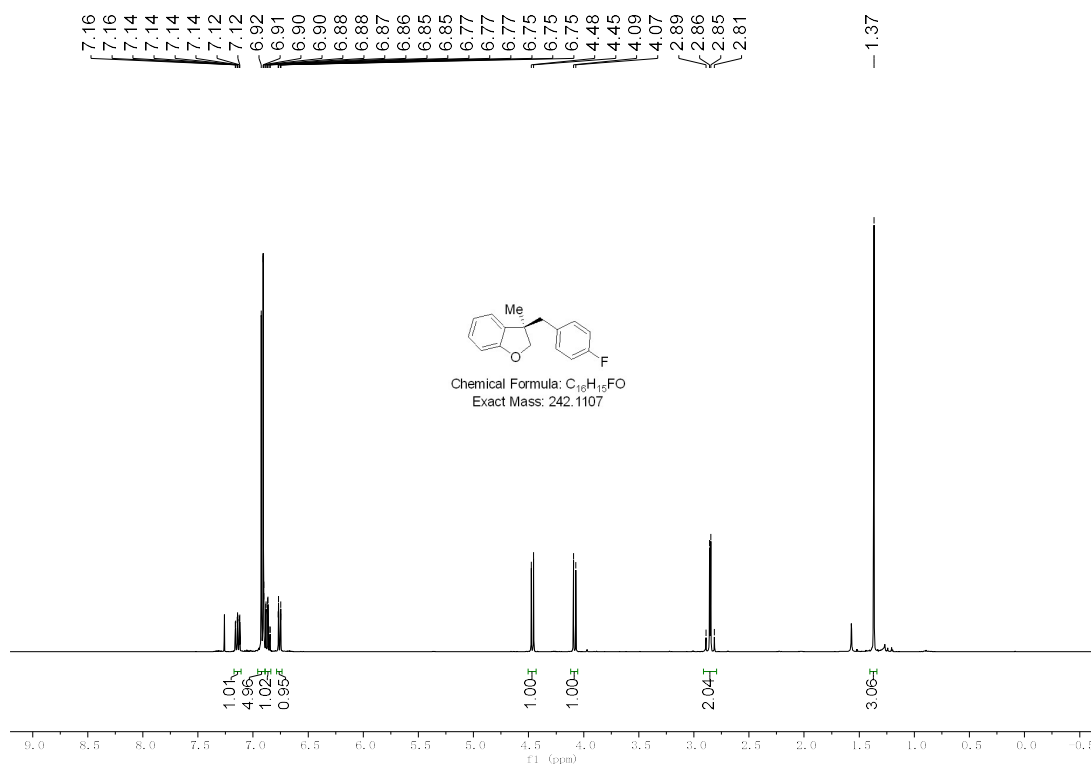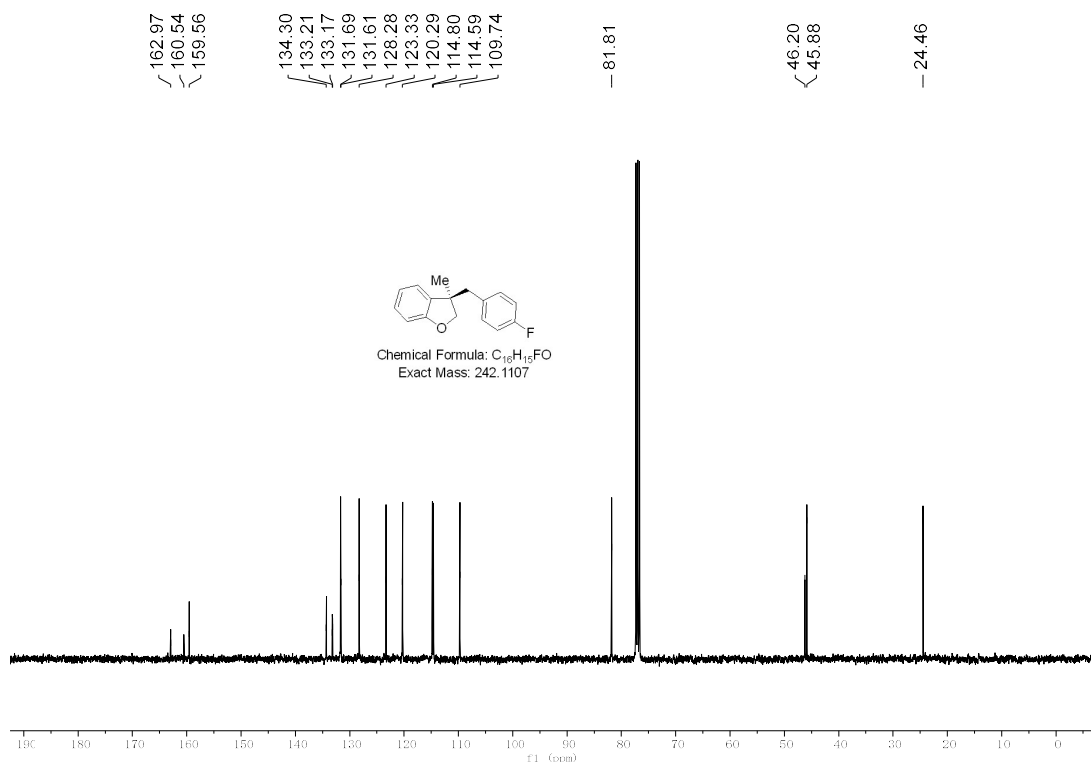

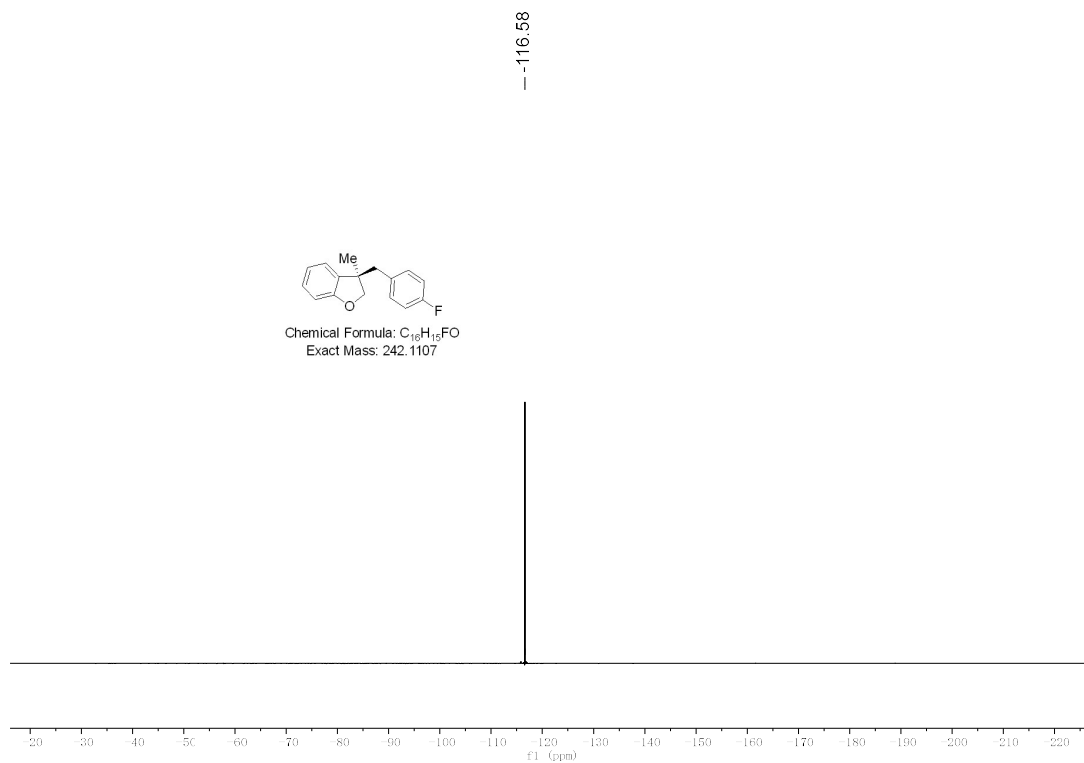

3af

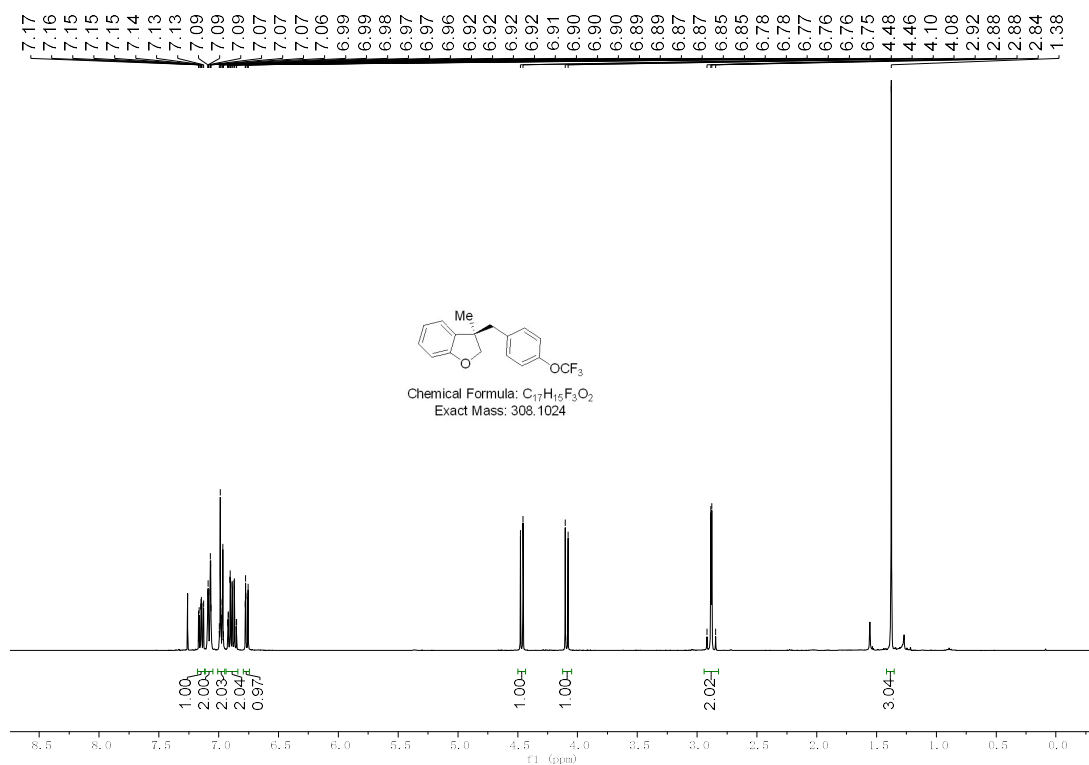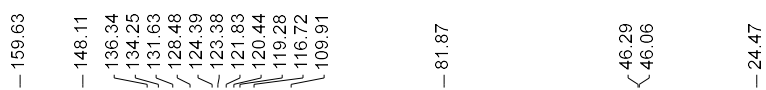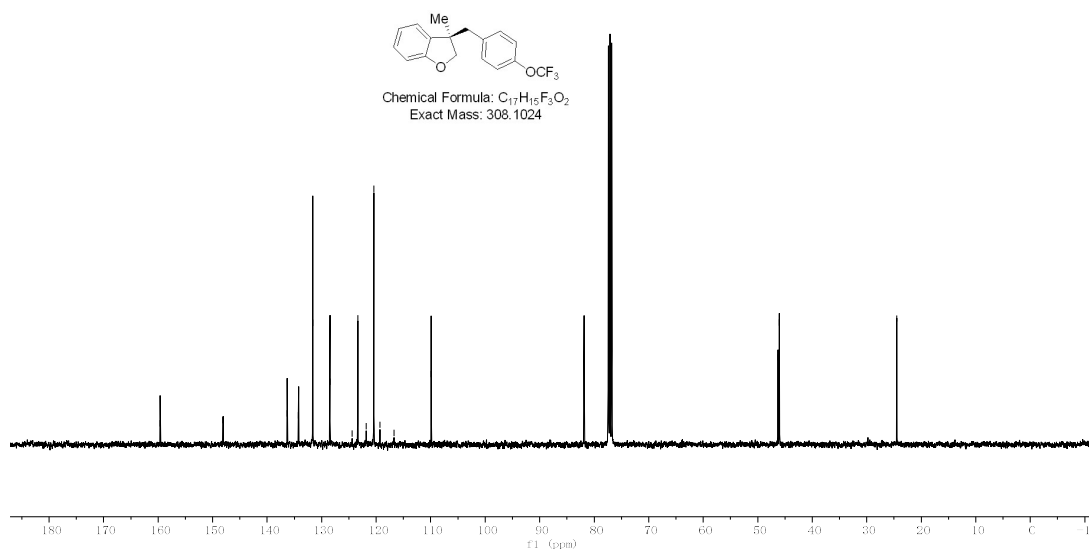

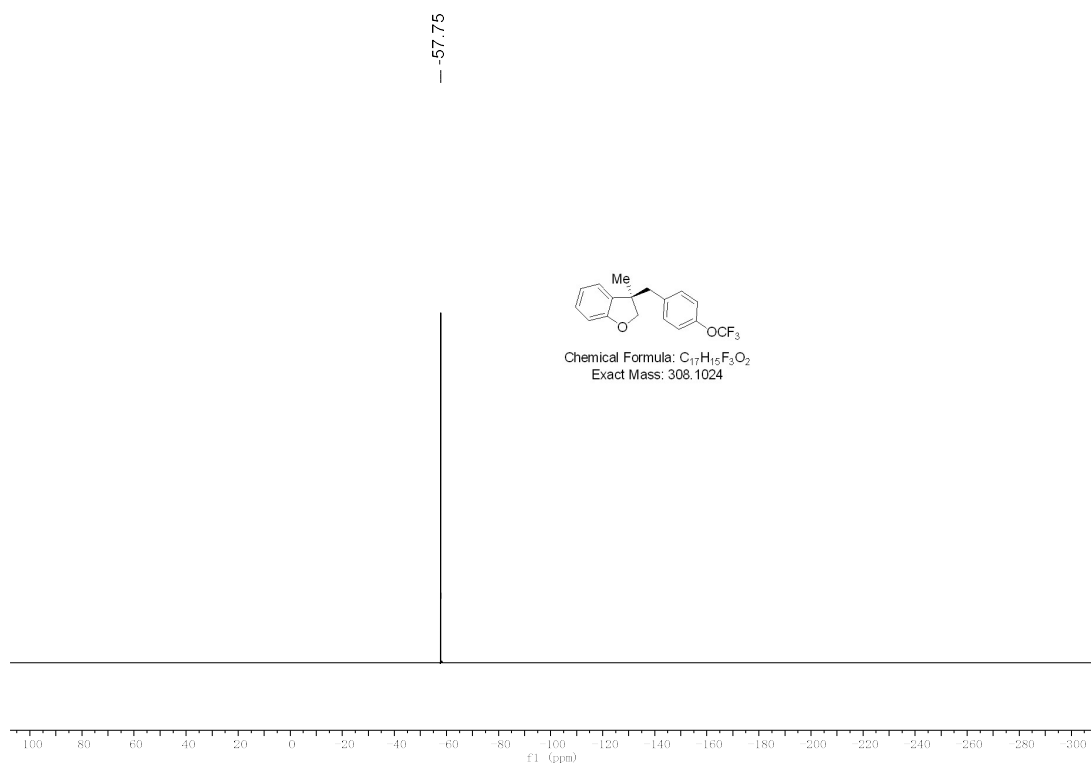

3ag

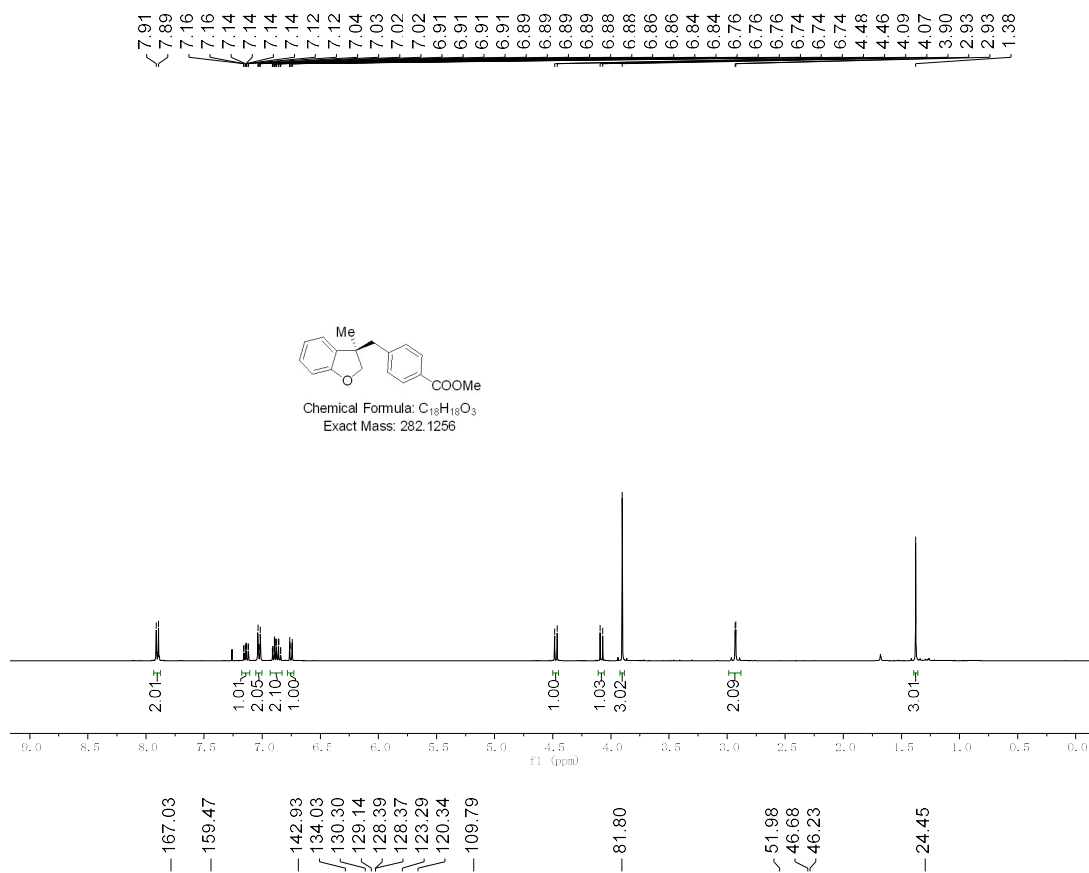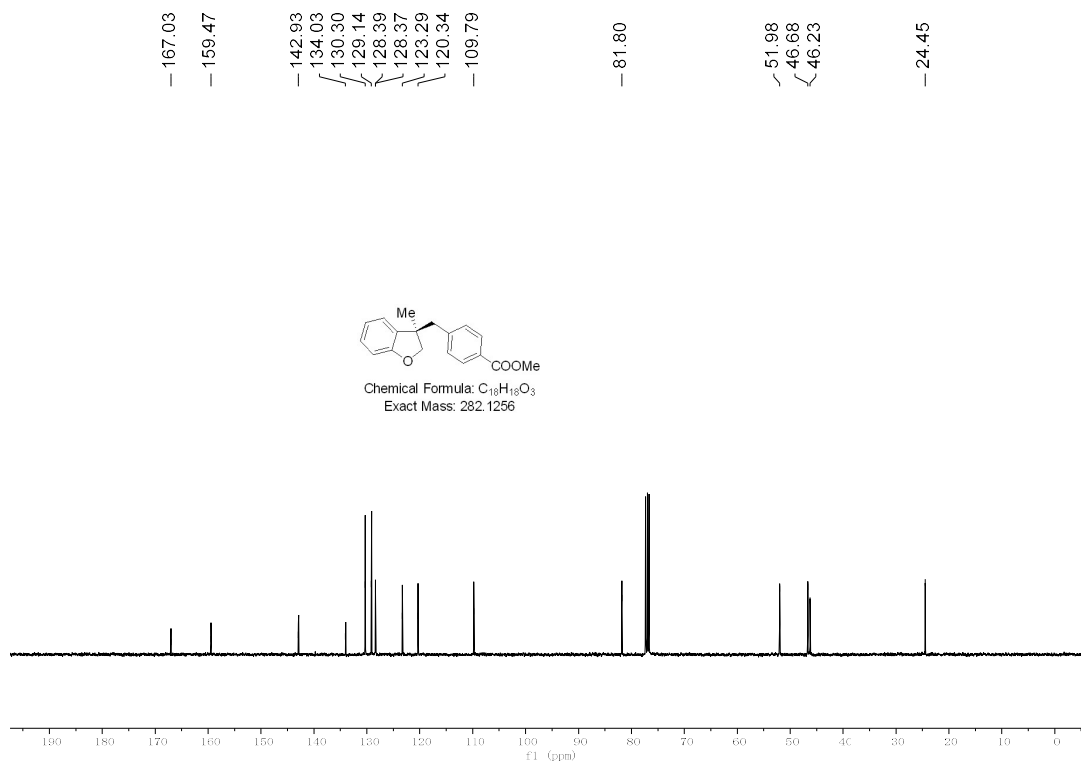

**3ah**

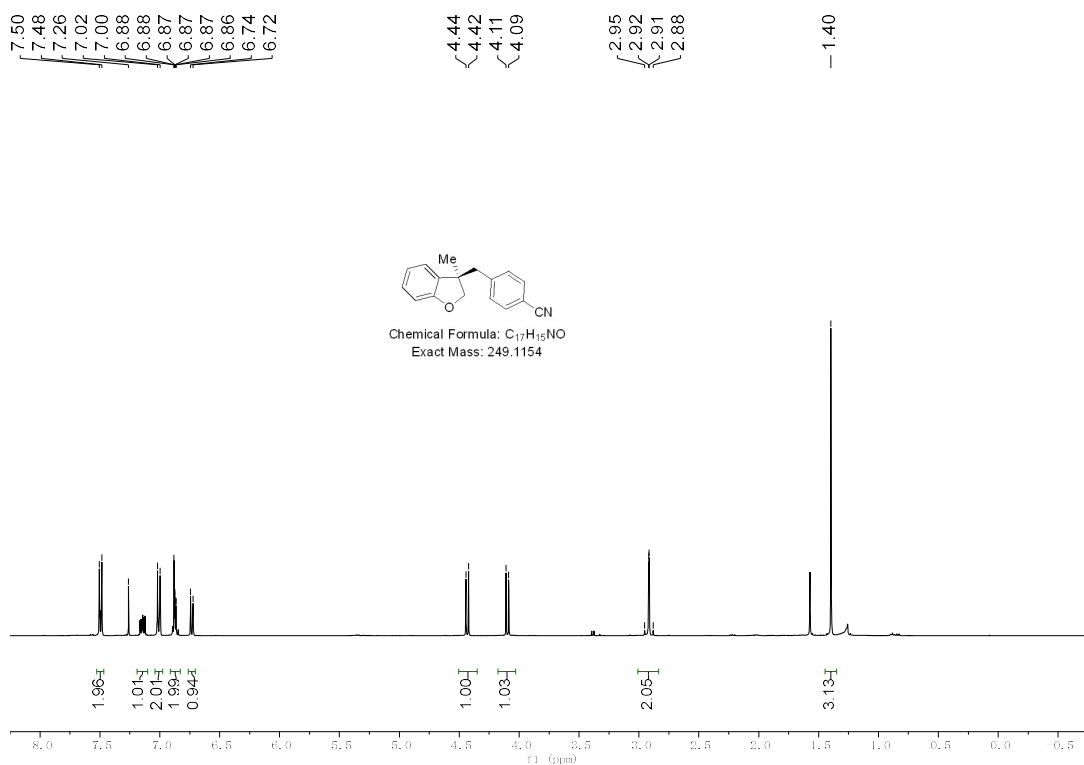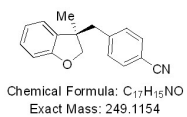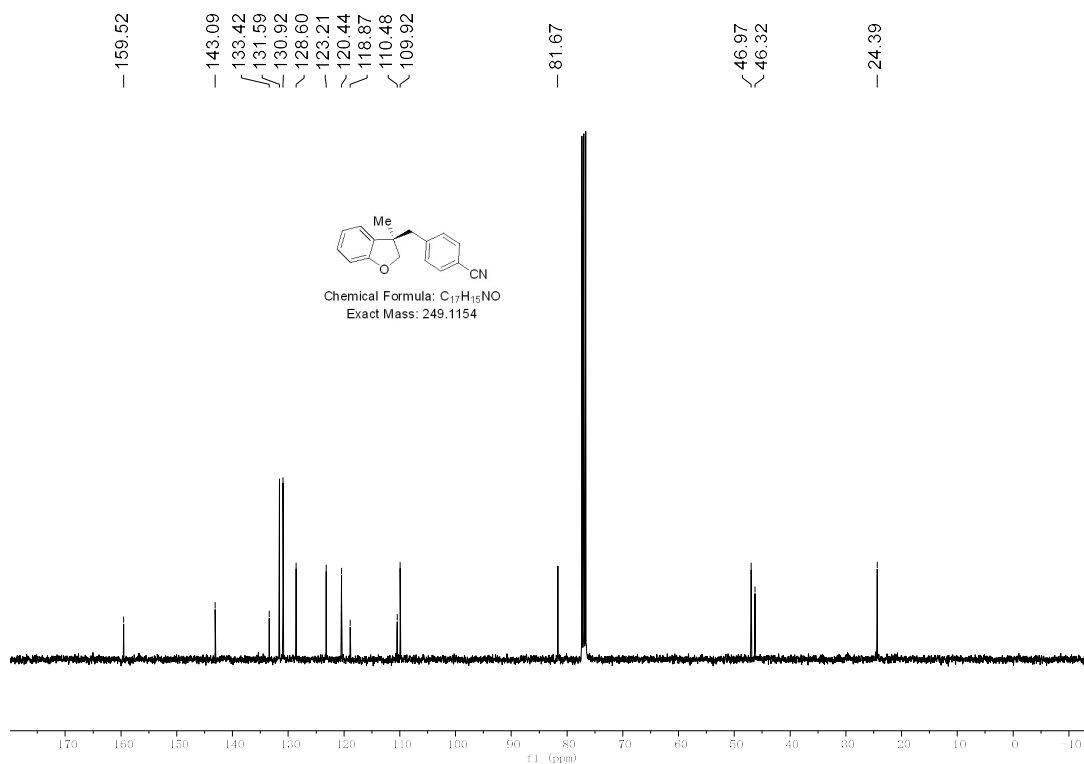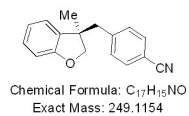

3ai

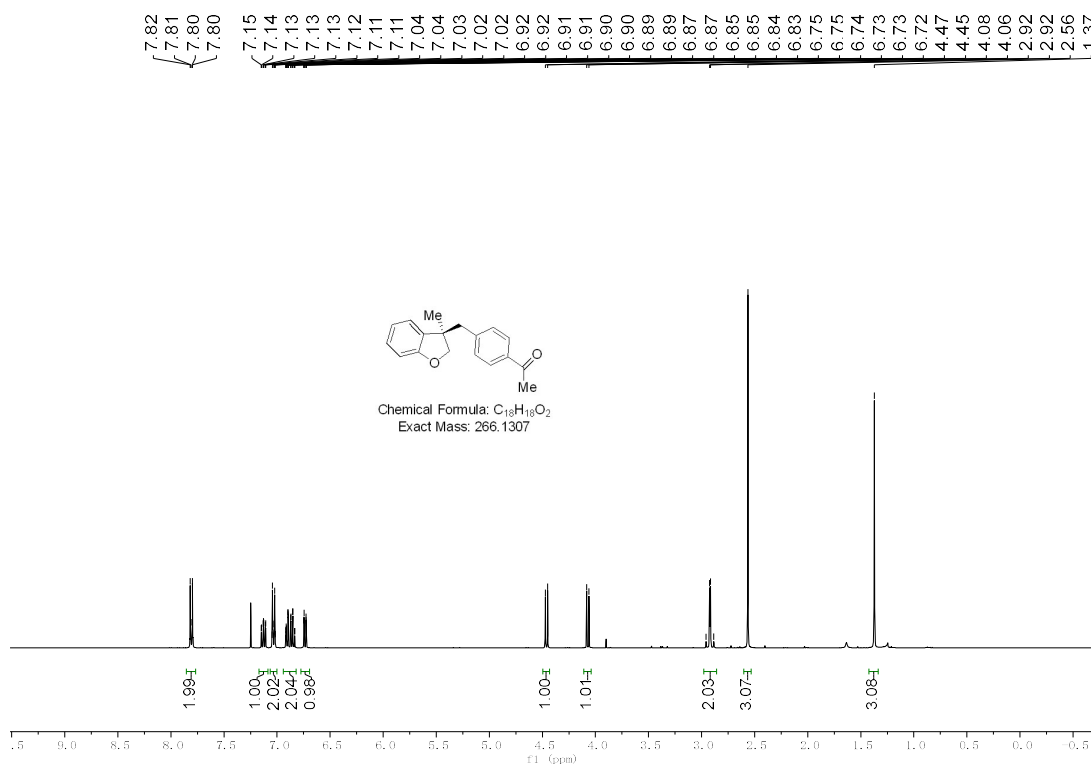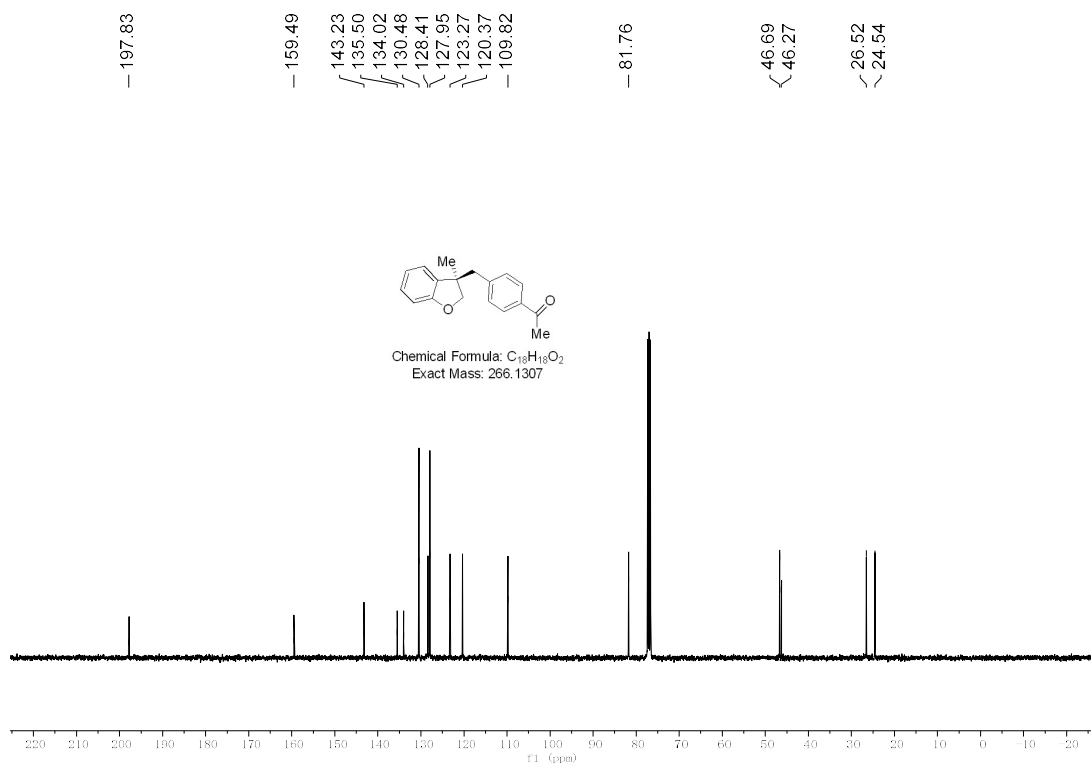

3aj

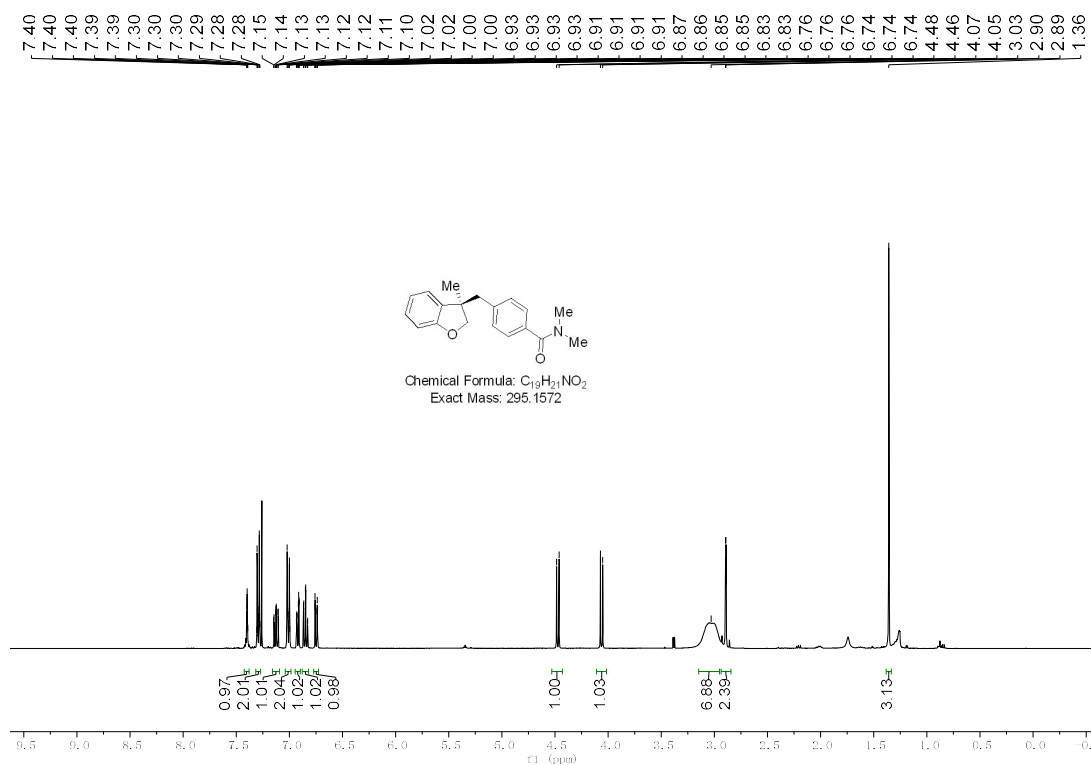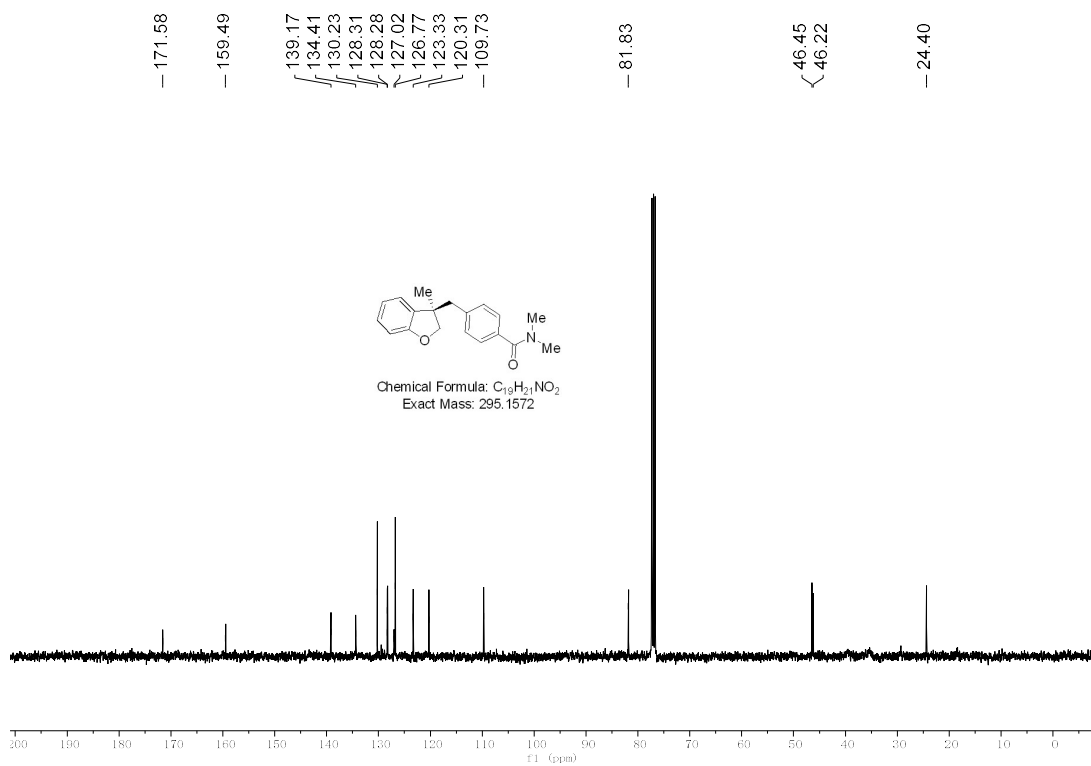



|      |      |      |      |      |      |      |      |      |      |      |      |      |      |      |      |      |      |      |      |      |      |      |      |      |      |      |      |      |      |      |      |      |      |
|------|------|------|------|------|------|------|------|------|------|------|------|------|------|------|------|------|------|------|------|------|------|------|------|------|------|------|------|------|------|------|------|------|------|
| 7.79 | 7.77 | 7.17 | 7.16 | 7.15 | 7.15 | 7.14 | 7.14 | 7.13 | 7.13 | 7.12 | 7.12 | 7.11 | 6.91 | 6.91 | 6.89 | 6.89 | 6.88 | 6.87 | 6.87 | 6.85 | 6.85 | 6.75 | 6.75 | 6.75 | 6.73 | 6.73 | 4.46 | 4.44 | 4.11 | 4.09 | 3.04 | 2.96 | 2.95 |
|------|------|------|------|------|------|------|------|------|------|------|------|------|------|------|------|------|------|------|------|------|------|------|------|------|------|------|------|------|------|------|------|------|------|

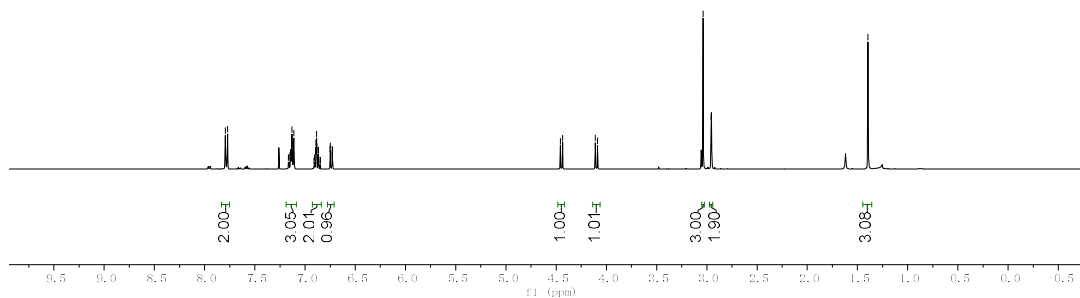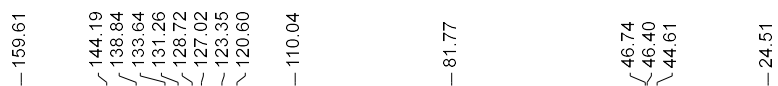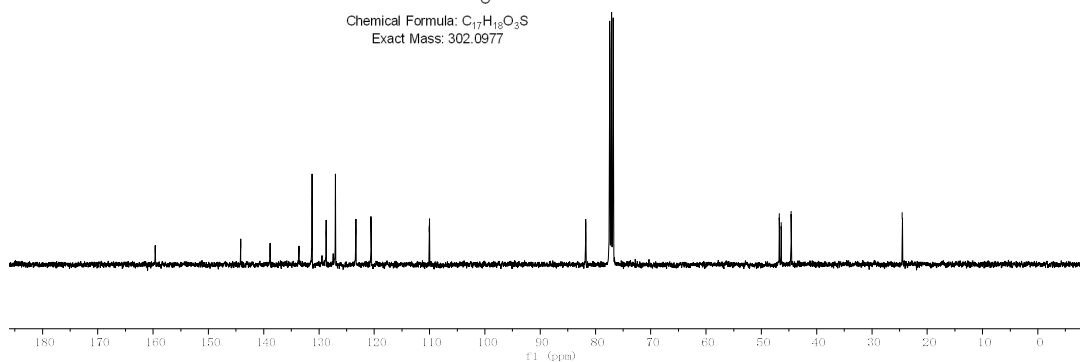

3al

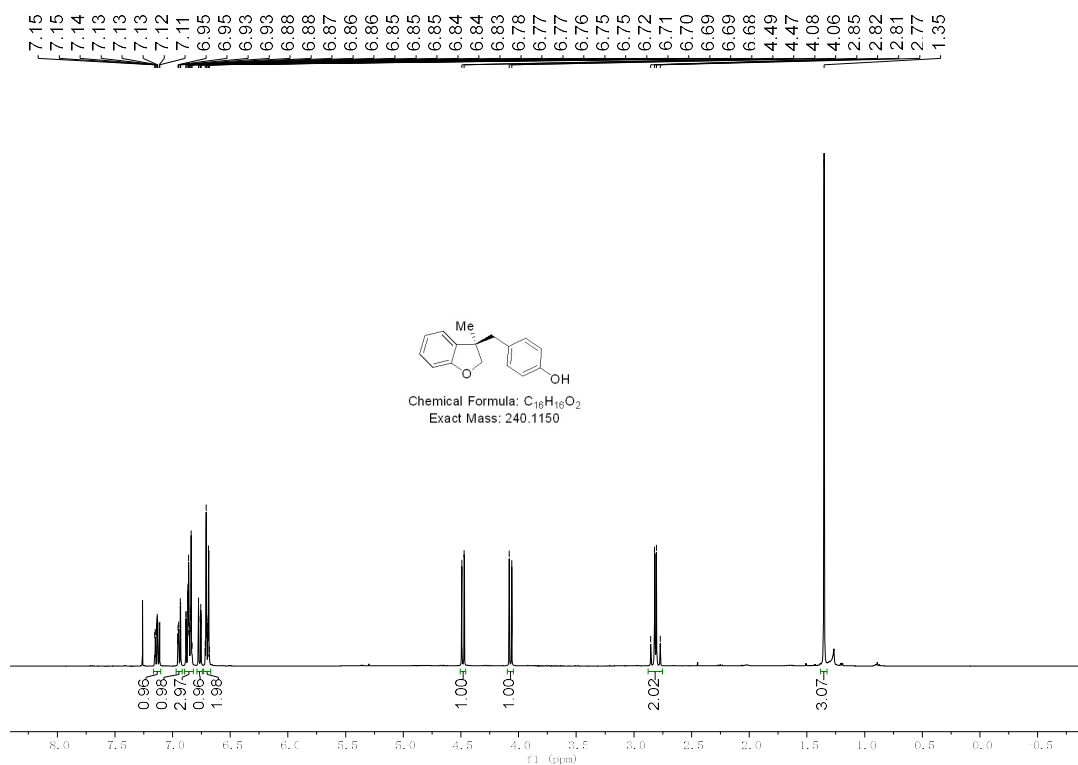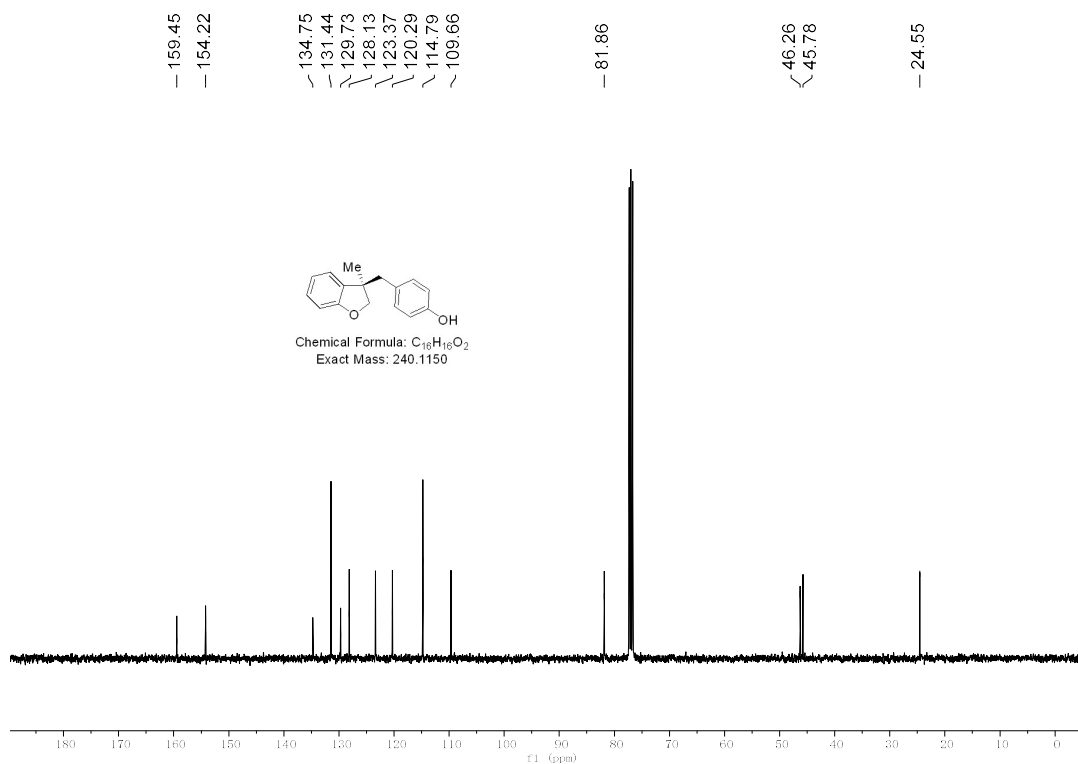

3am

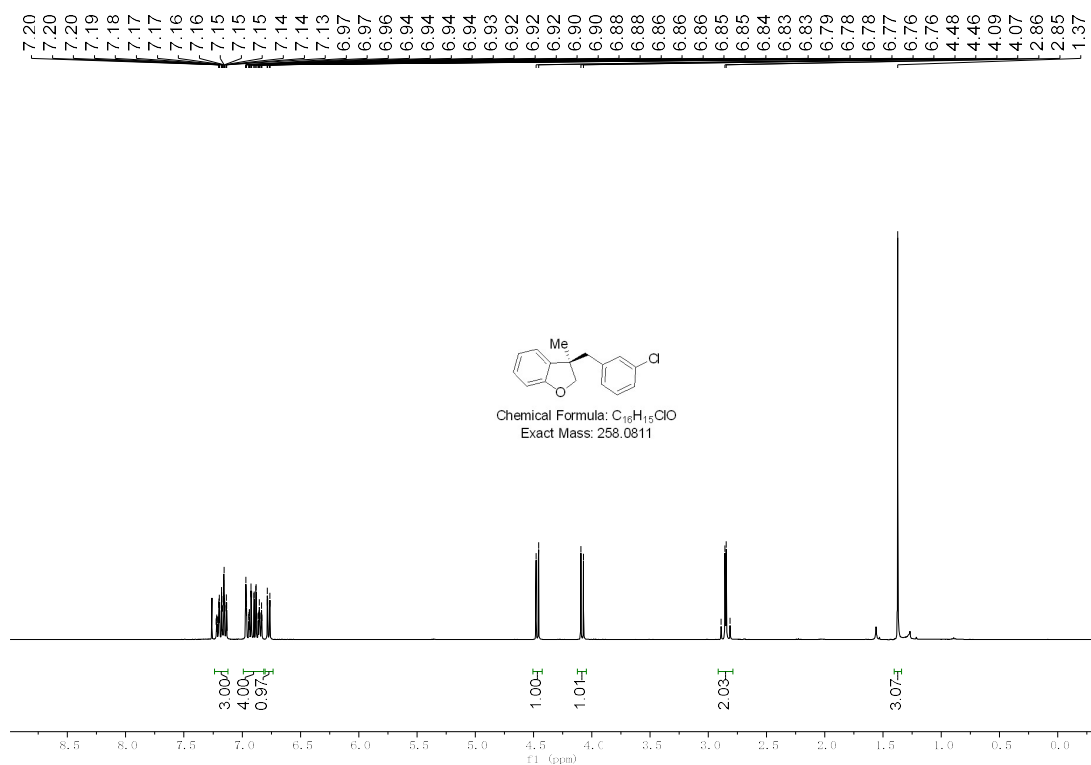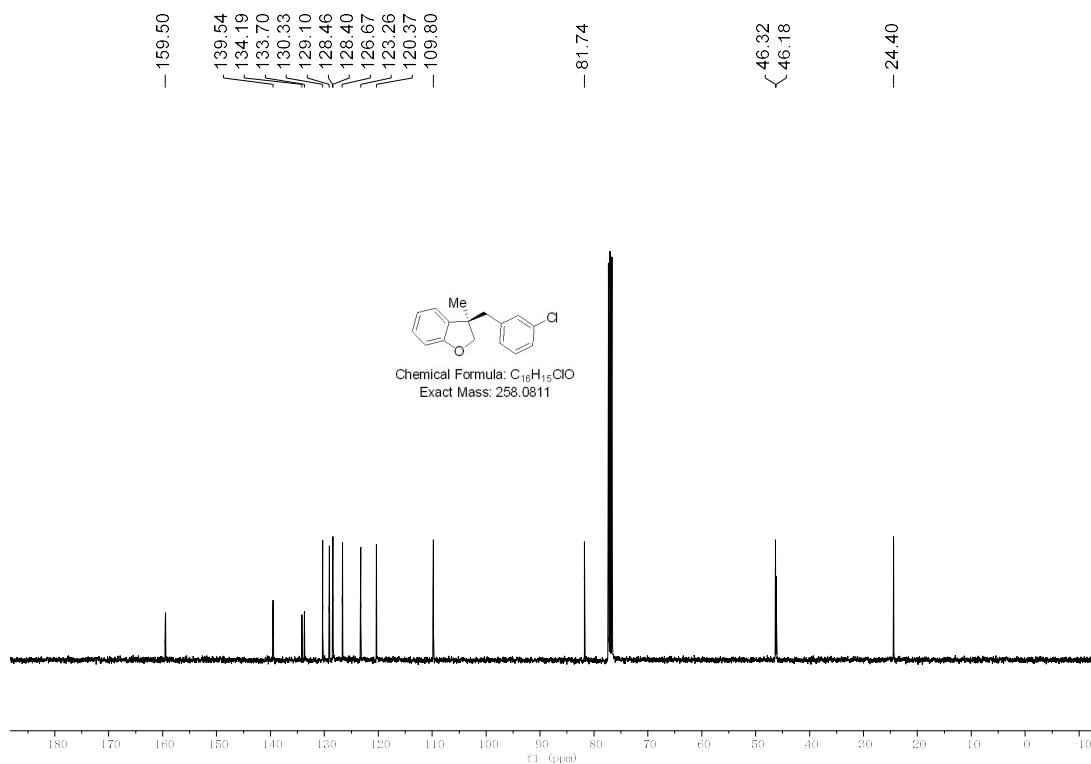

3an

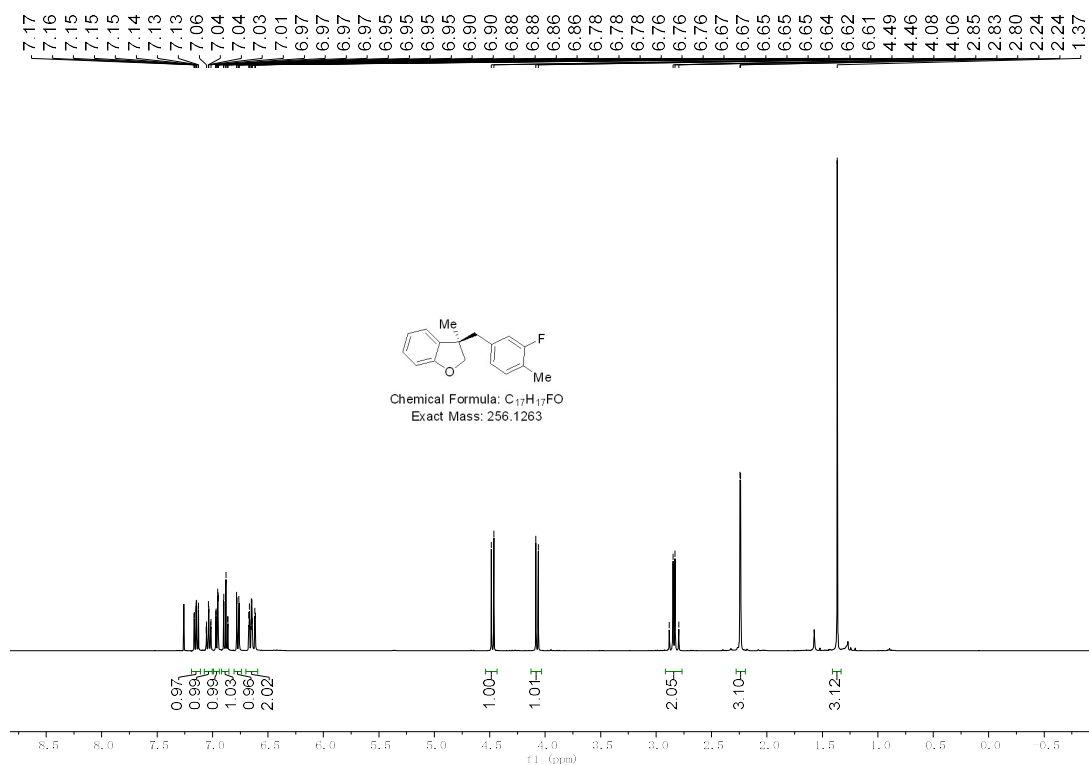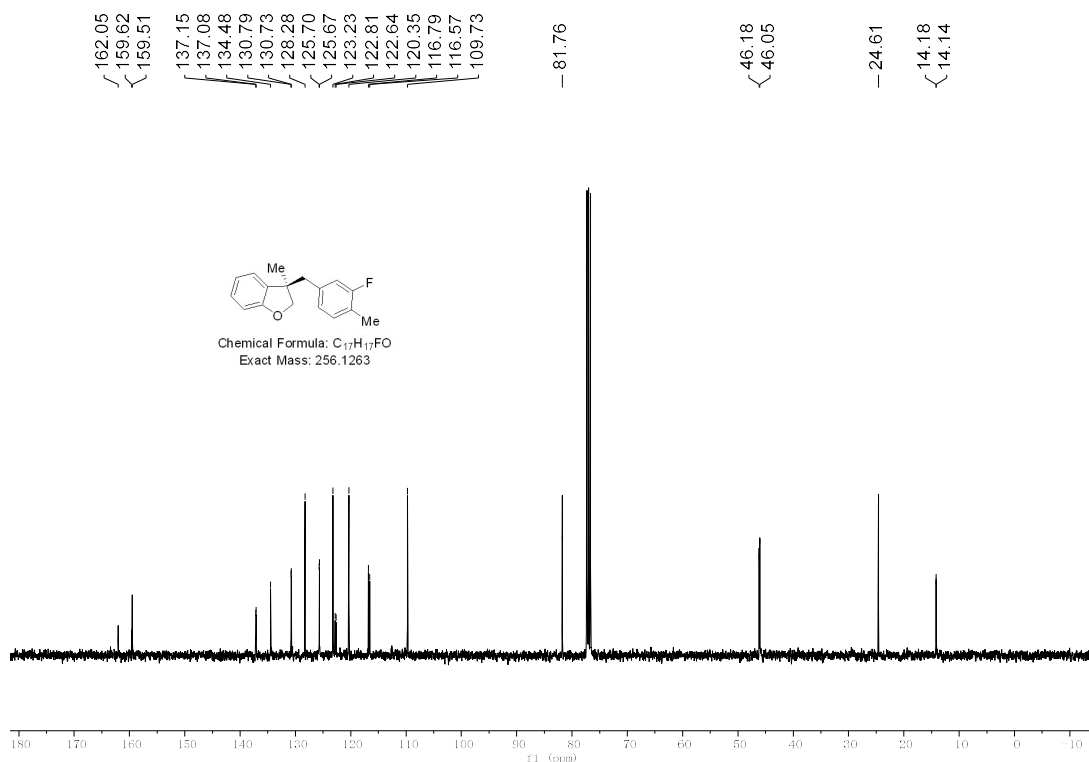

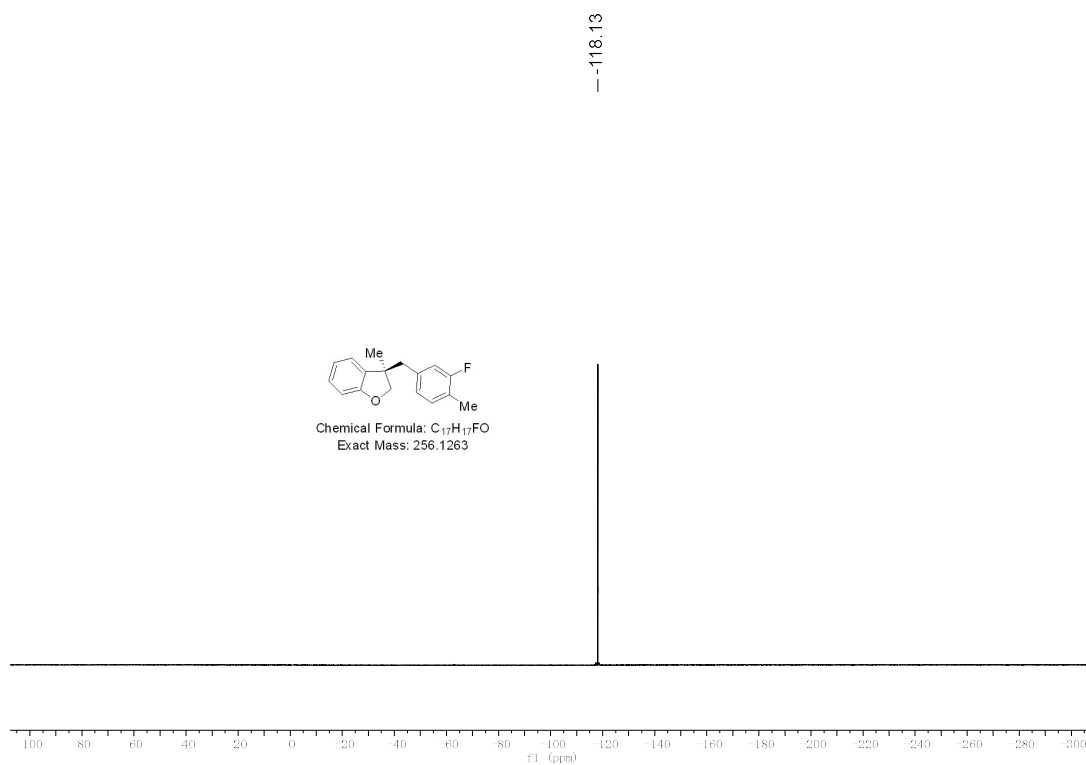

3ao

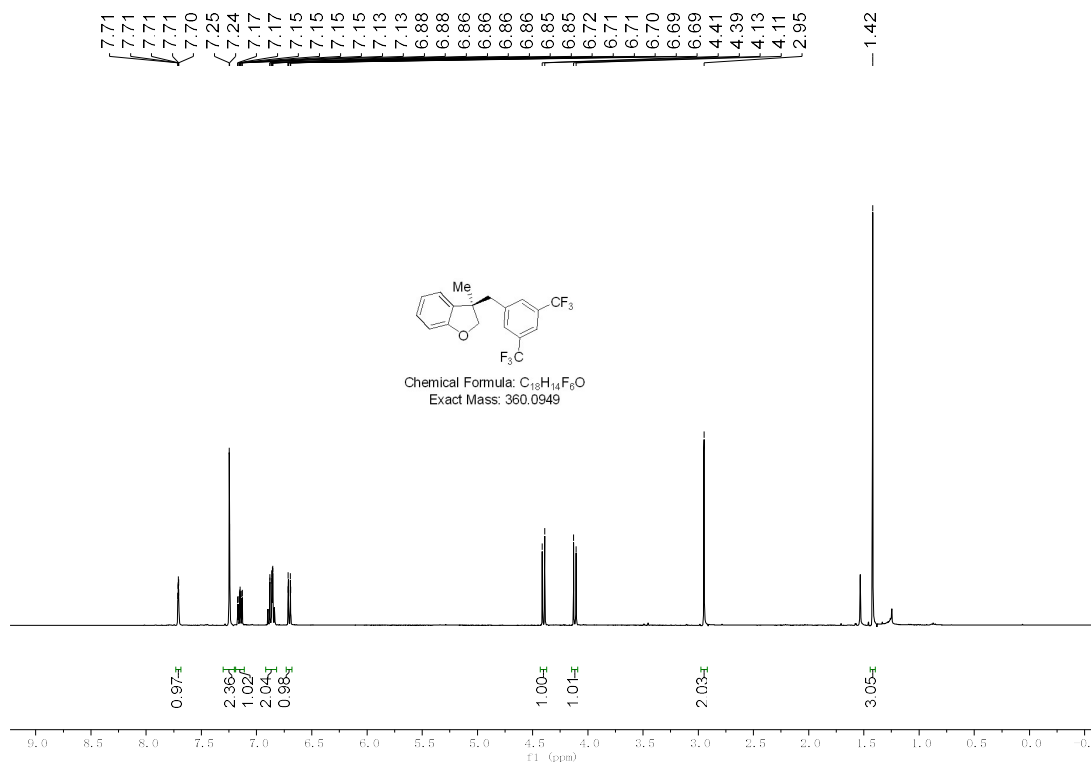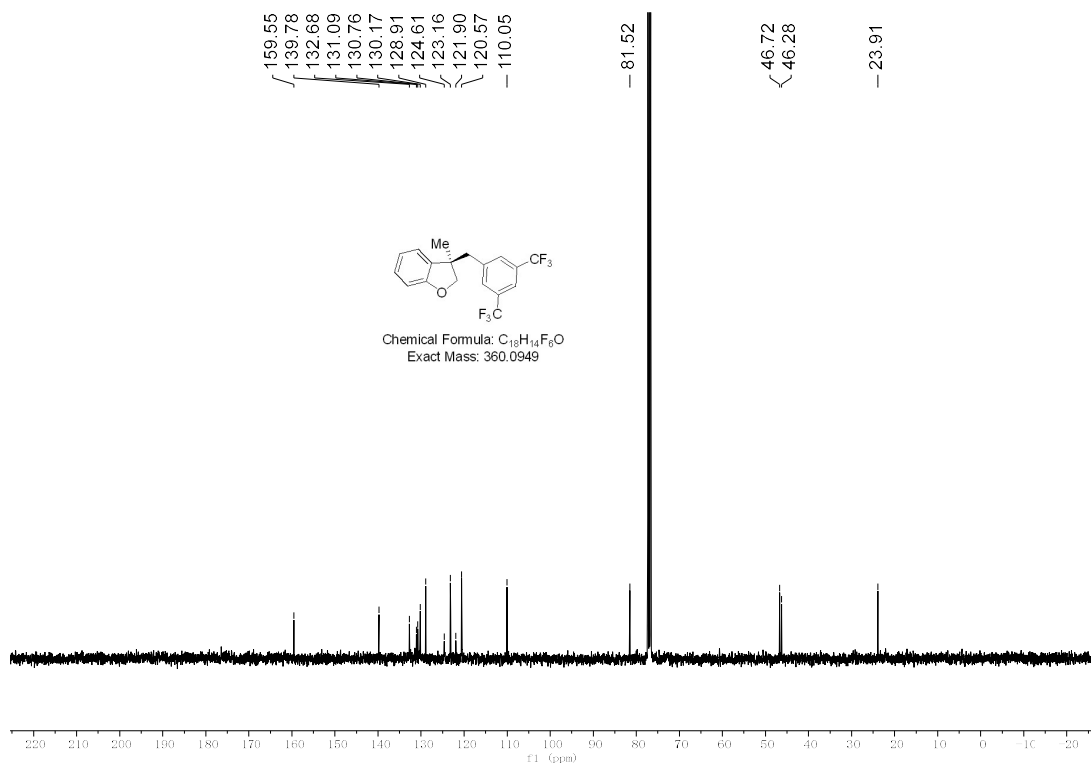

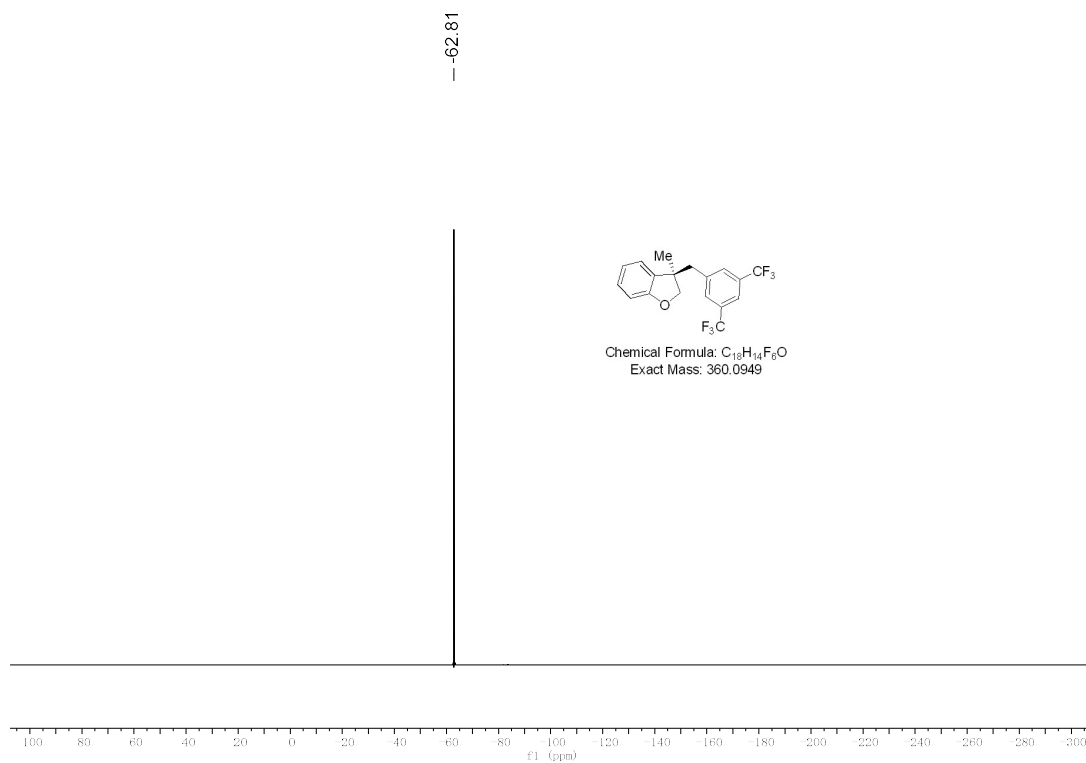

3ap

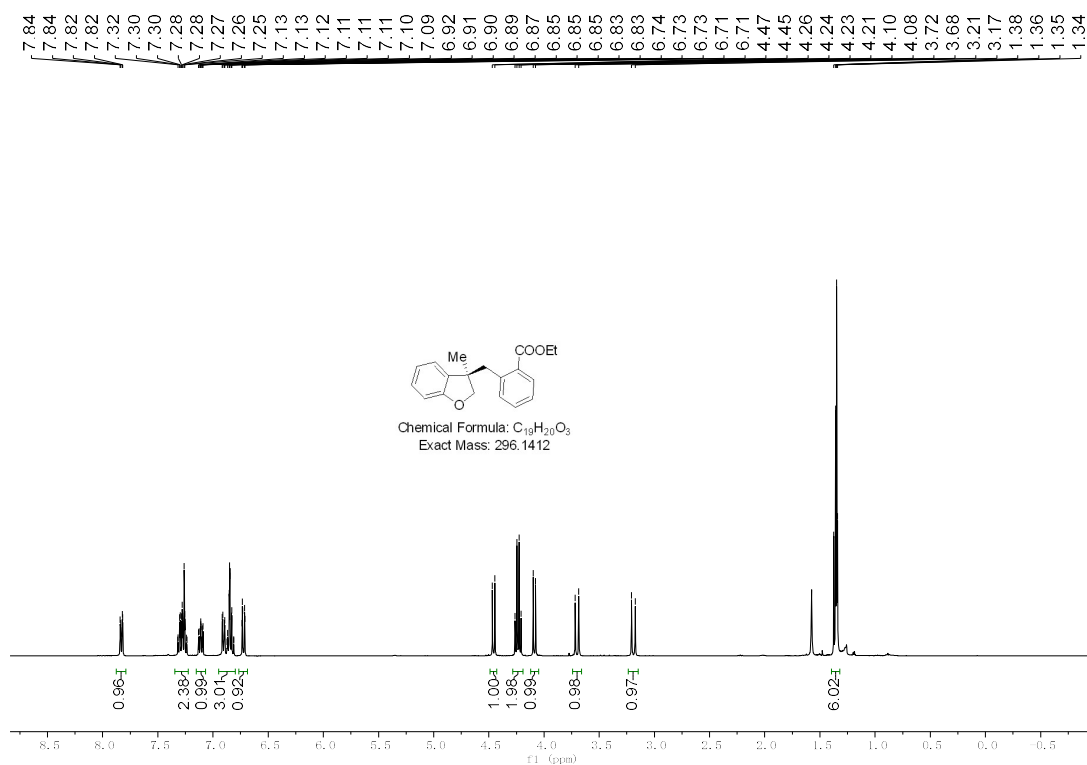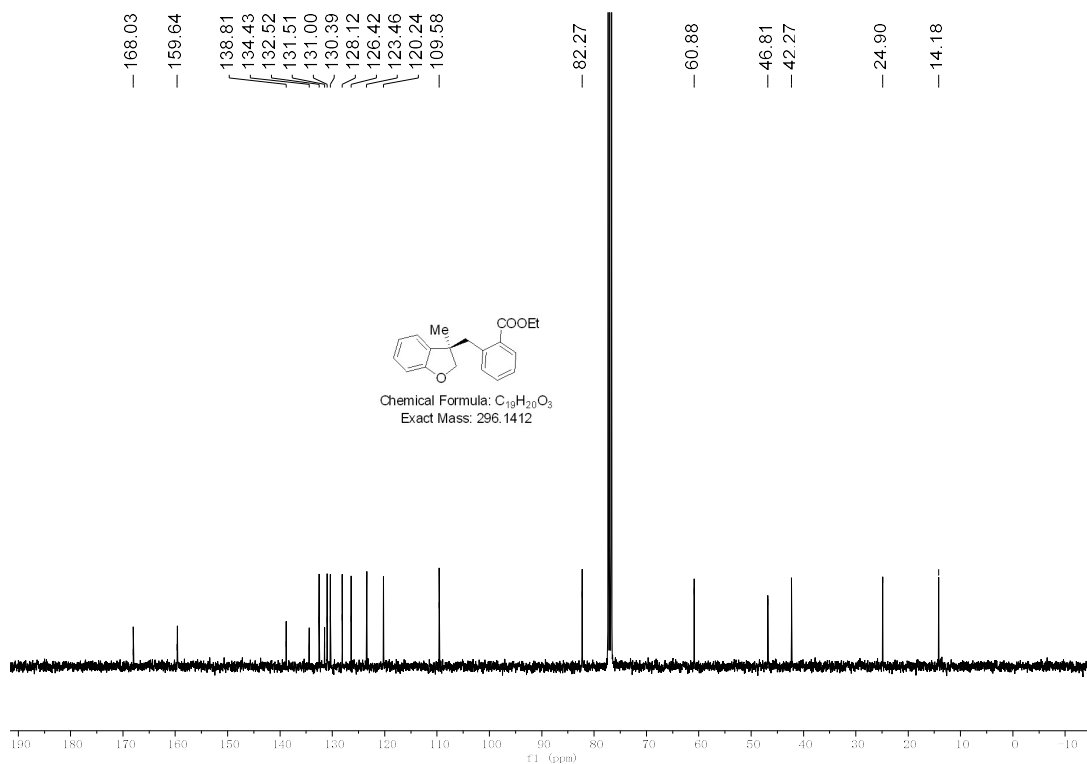



3aq

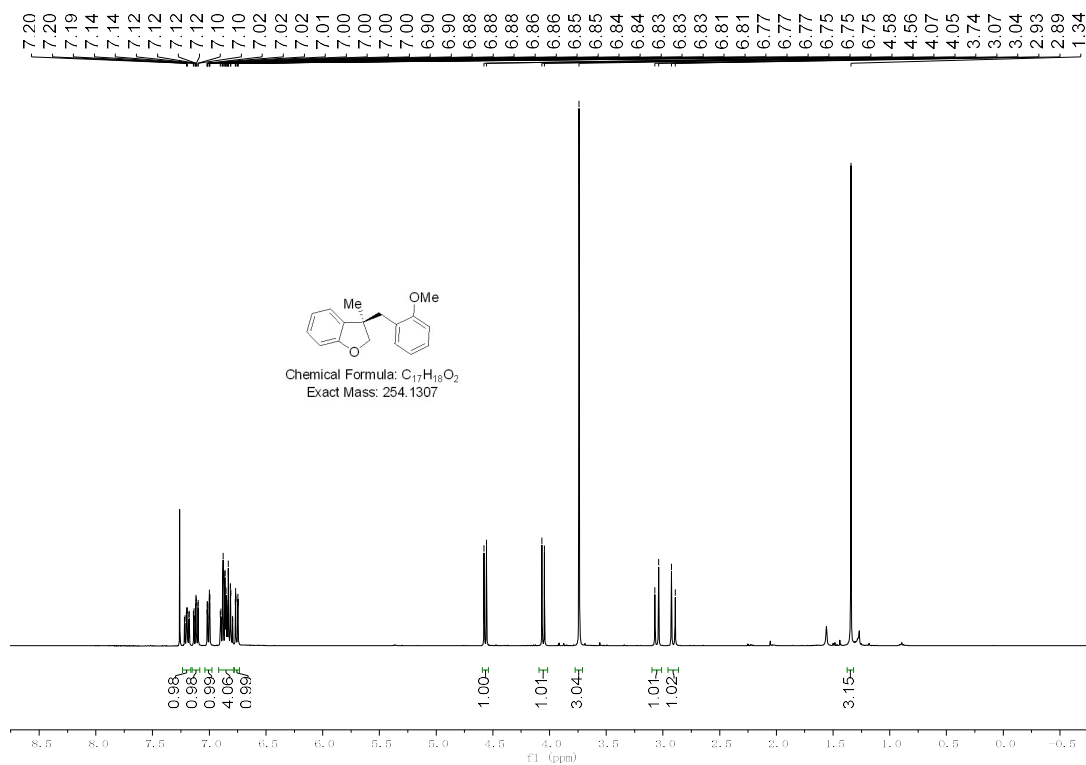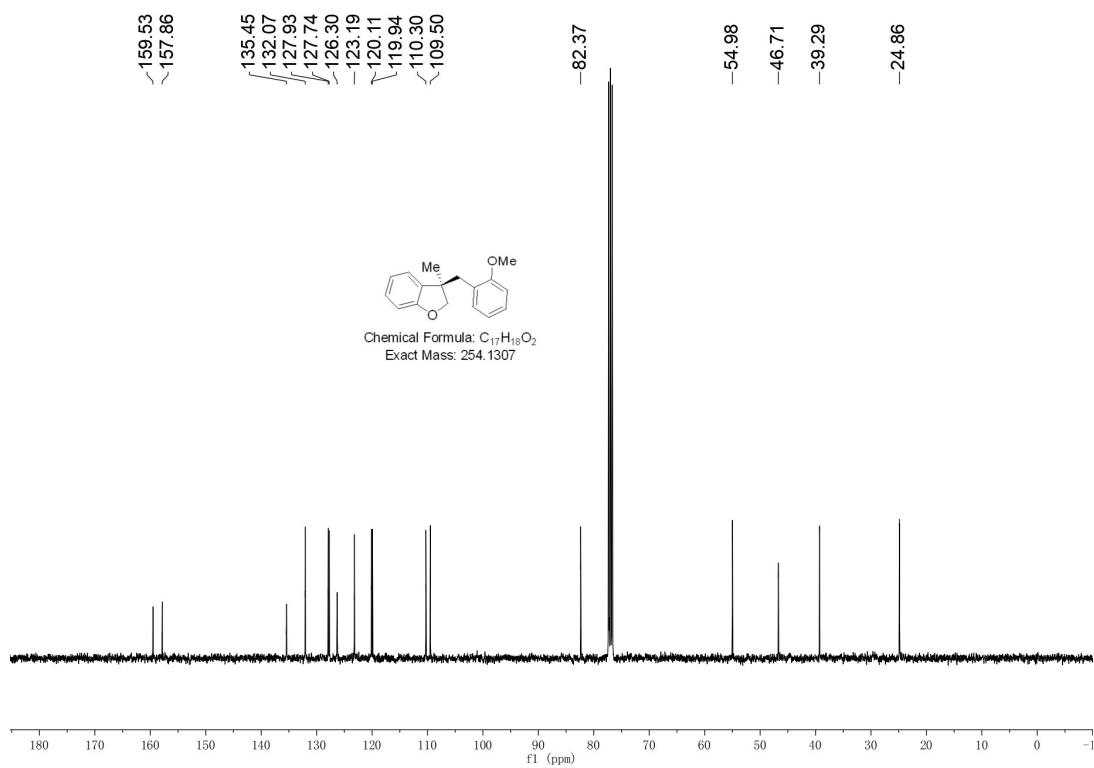

# 3ar

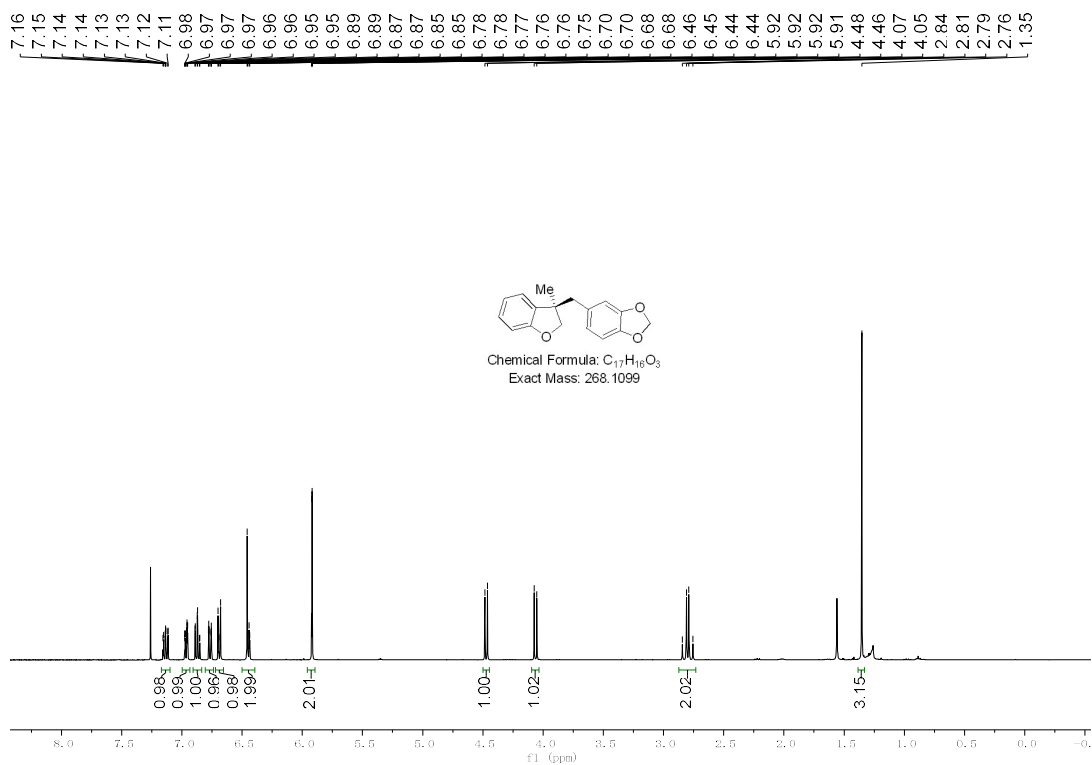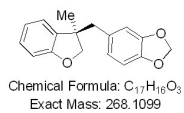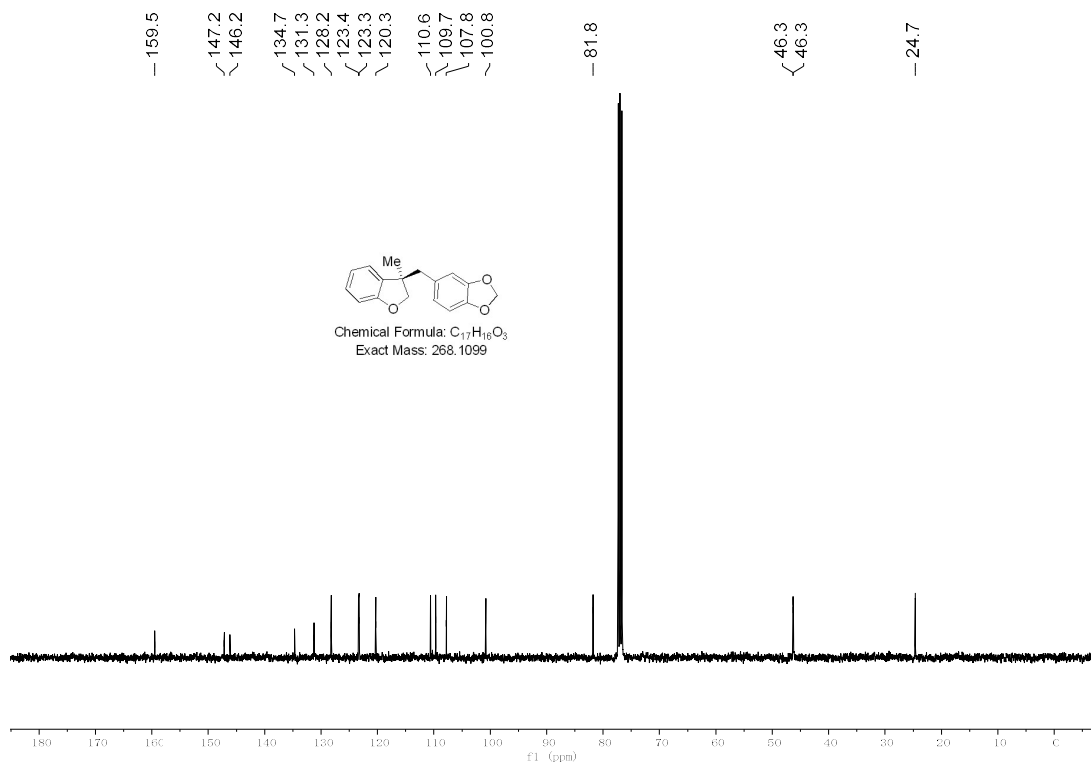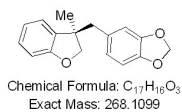

3as

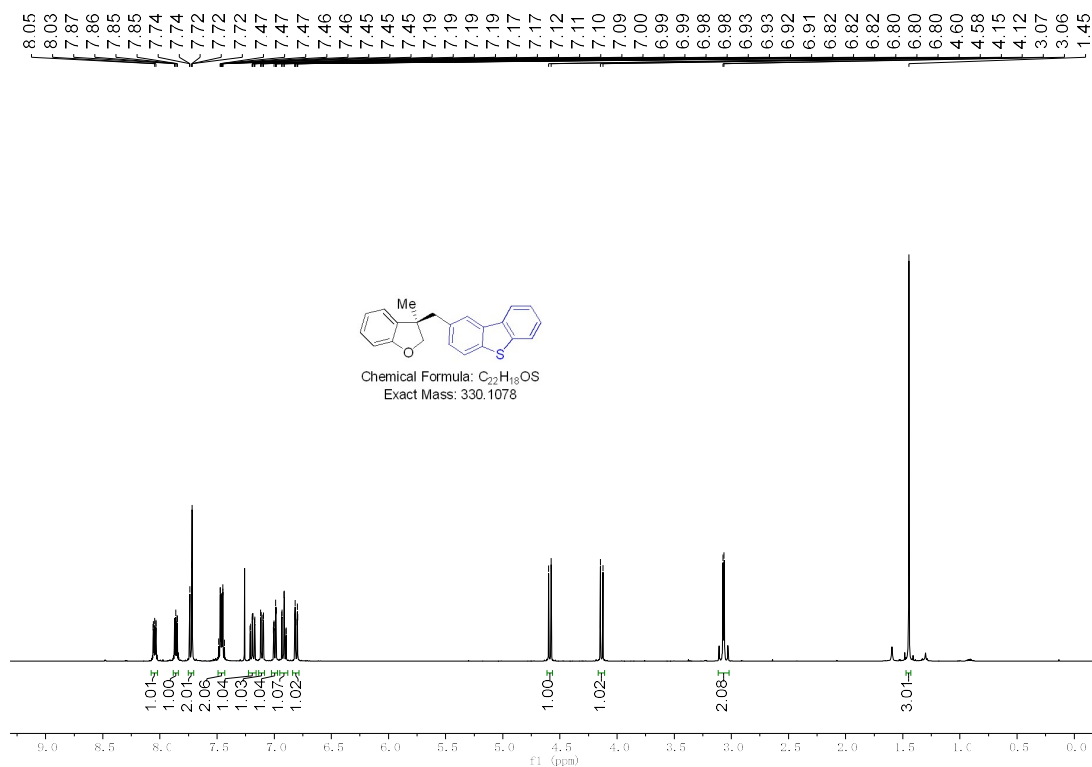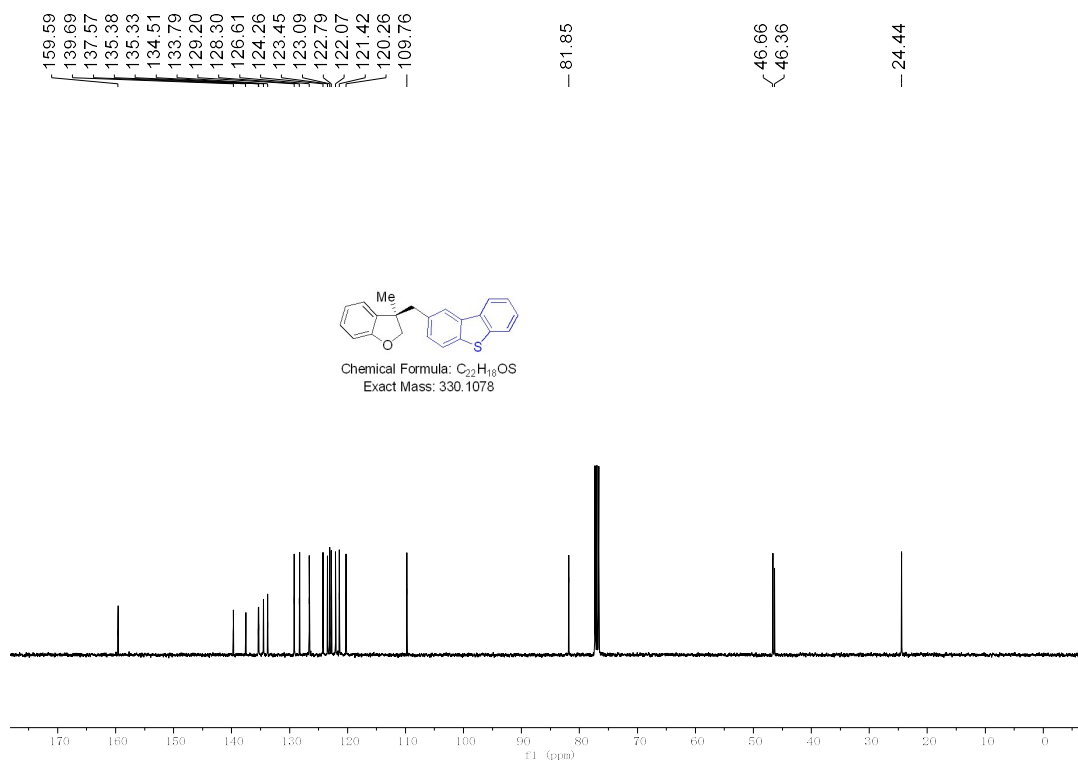

3at

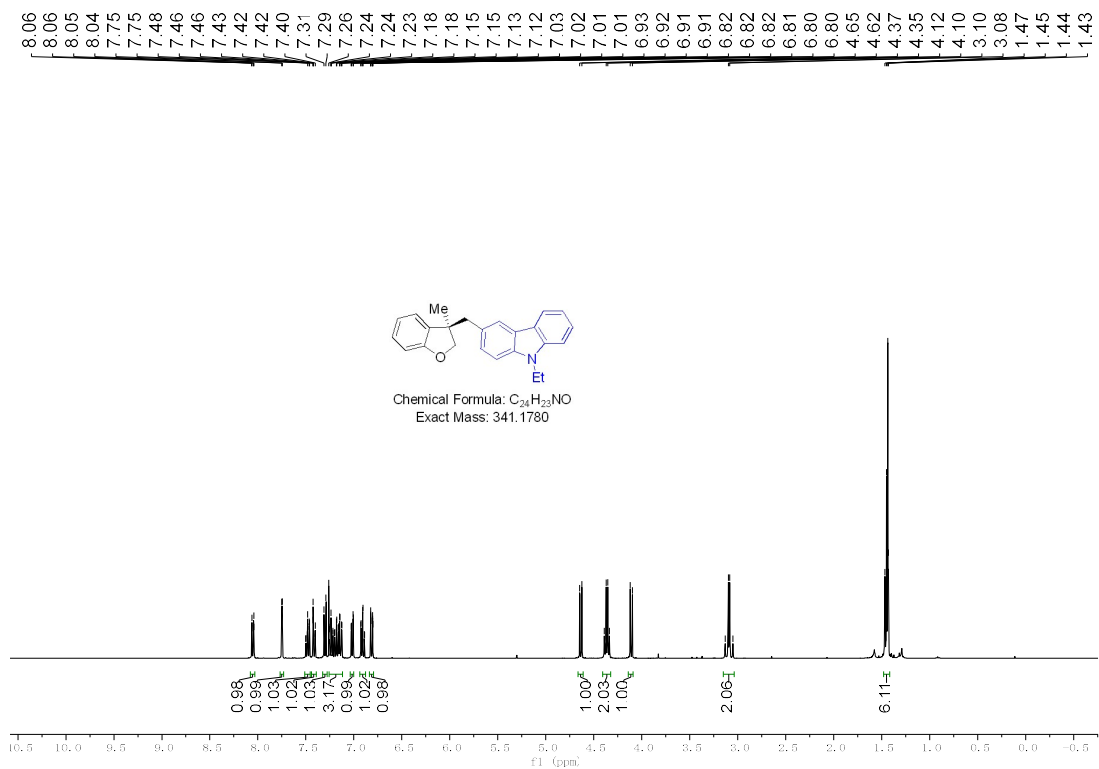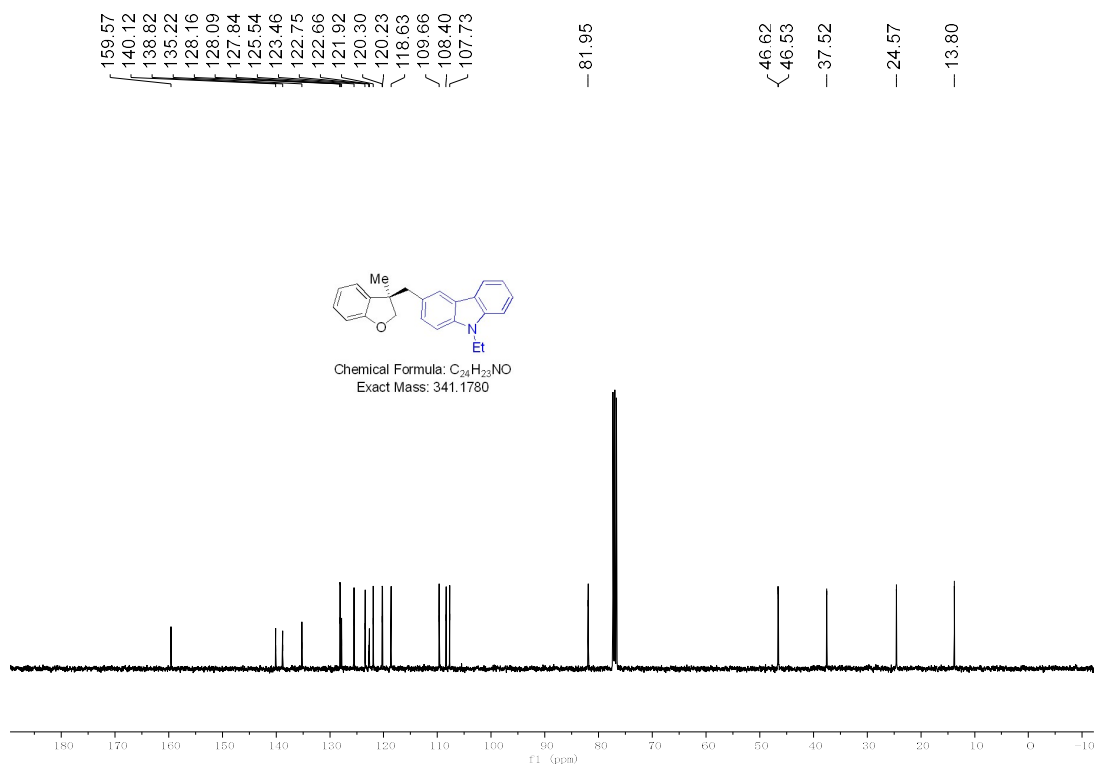

3au

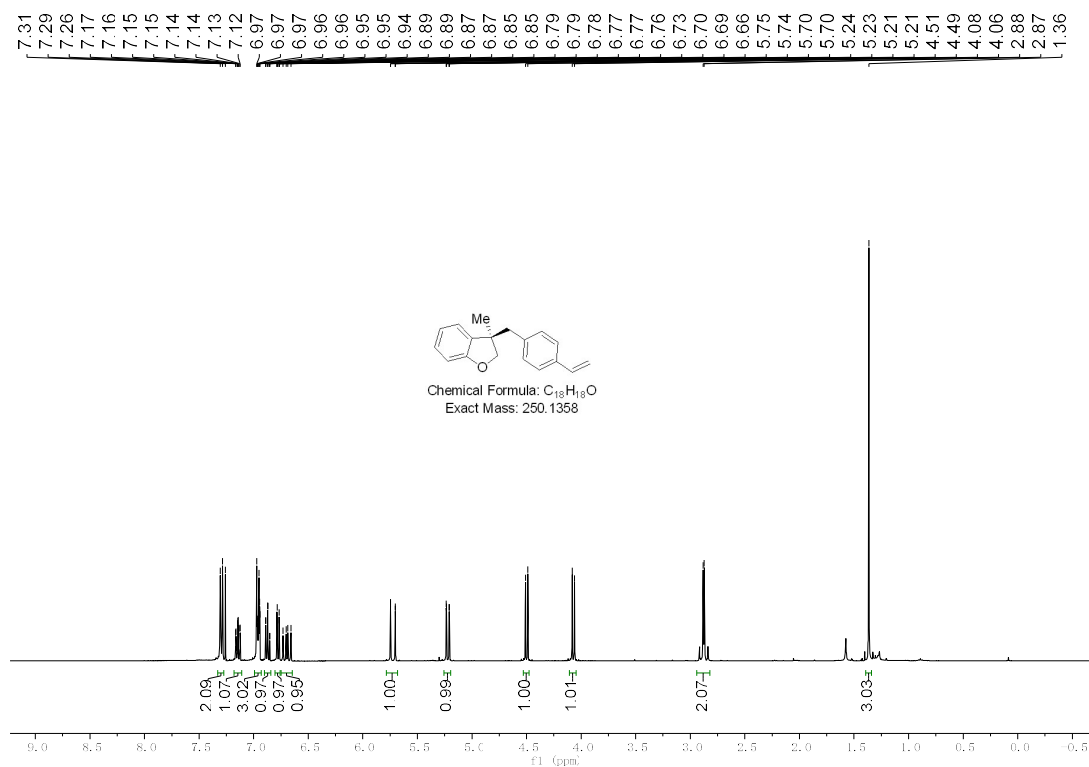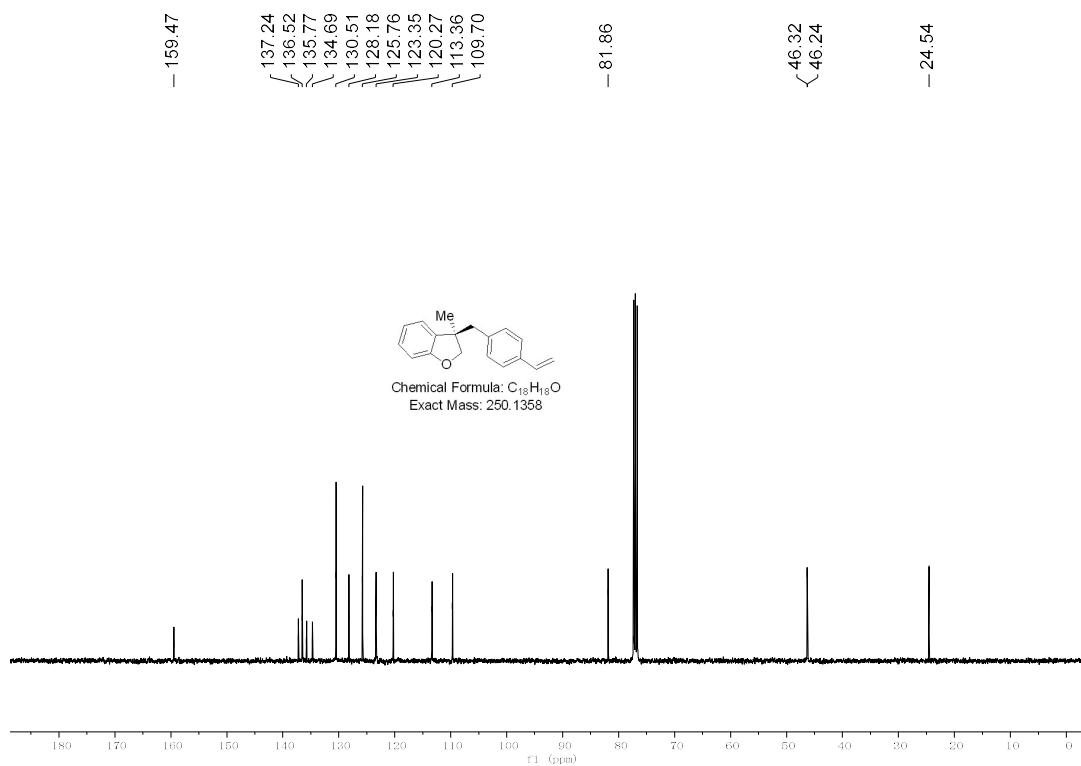

# 3ba

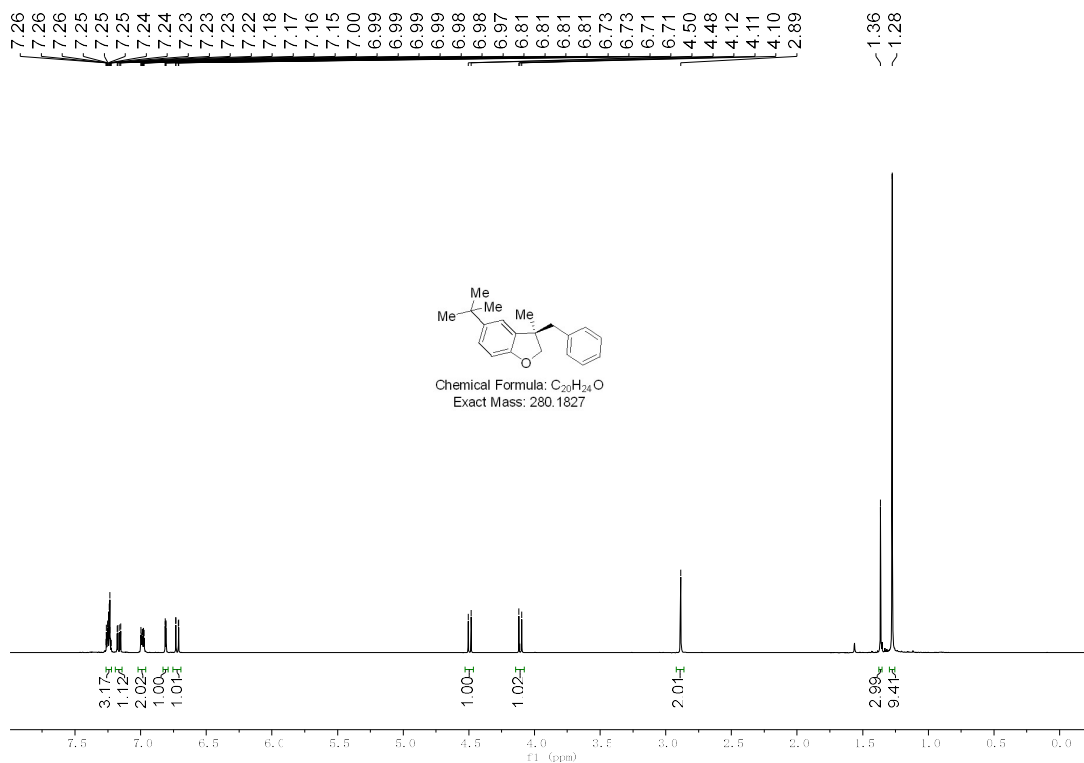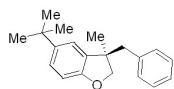

Chemical Formula: C<sub>20</sub>H<sub>24</sub>O  
Exact Mass: 280.1827

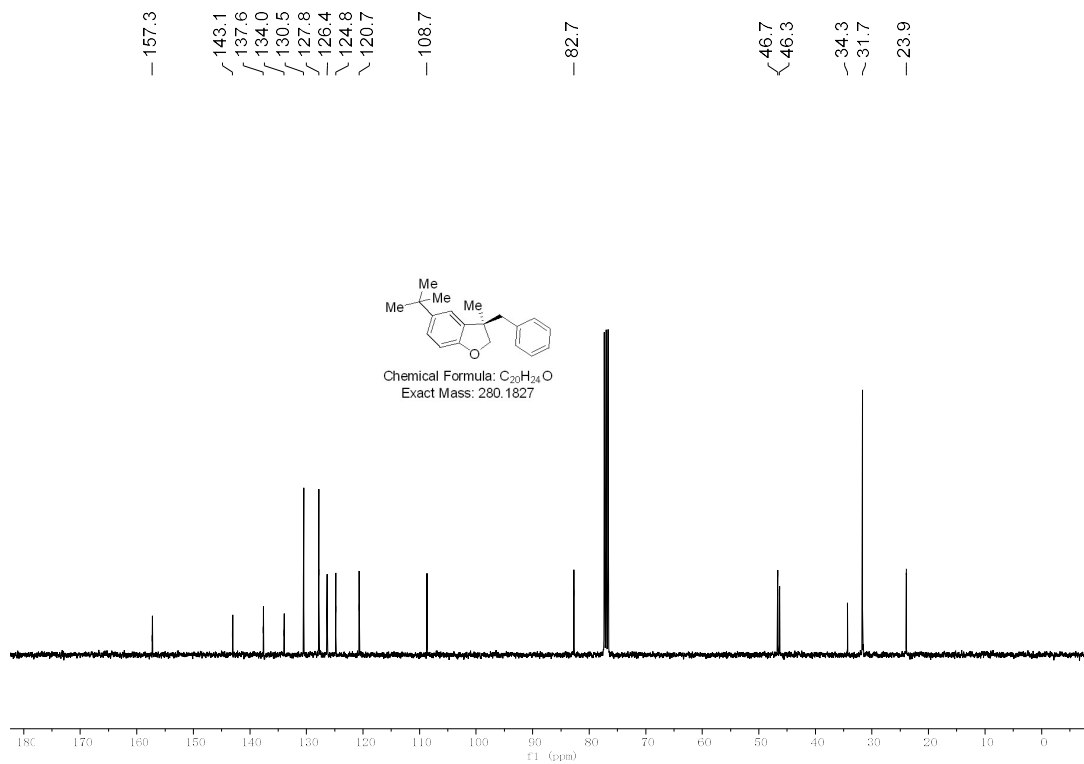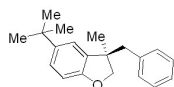

Chemical Formula: C<sub>20</sub>H<sub>24</sub>O  
Exact Mass: 280.1827

|      |      |
|------|------|
| 7.53 | 7.53 |
| 7.53 | 7.53 |
| 7.52 | 7.52 |
| 7.51 | 7.51 |
| 7.51 | 7.51 |
| 7.51 | 7.51 |
| 7.50 | 7.50 |
| 7.45 | 7.45 |
| 7.44 | 7.44 |
| 7.44 | 7.44 |
| 7.43 | 7.43 |
| 7.42 | 7.42 |
| 7.41 | 7.41 |
| 7.41 | 7.41 |
| 7.40 | 7.40 |
| 7.40 | 7.40 |
| 7.40 | 7.40 |
| 7.39 | 7.39 |
| 7.38 | 7.38 |
| 7.33 | 7.33 |
| 7.31 | 7.31 |
| 7.29 | 7.29 |
| 7.29 | 7.29 |
| 7.28 | 7.28 |
| 7.28 | 7.28 |
| 7.27 | 7.27 |
| 7.26 | 7.26 |
| 7.12 | 7.12 |
| 7.12 | 7.12 |
| 7.06 | 7.06 |
| 7.06 | 7.06 |
| 7.05 | 7.05 |
| 7.05 | 7.05 |
| 7.04 | 7.04 |
| 6.87 | 6.87 |
| 6.85 | 6.85 |
| 4.59 | 4.59 |
| 4.57 | 4.57 |
| 4.17 | 4.17 |
| 4.14 | 4.14 |
| 2.99 | 2.99 |
| 2.96 | 2.96 |
| 2.95 | 2.95 |
| 2.91 | 2.91 |
| 1.42 | 1.42 |

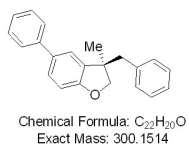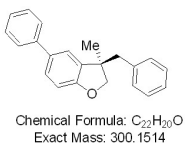

**3da**

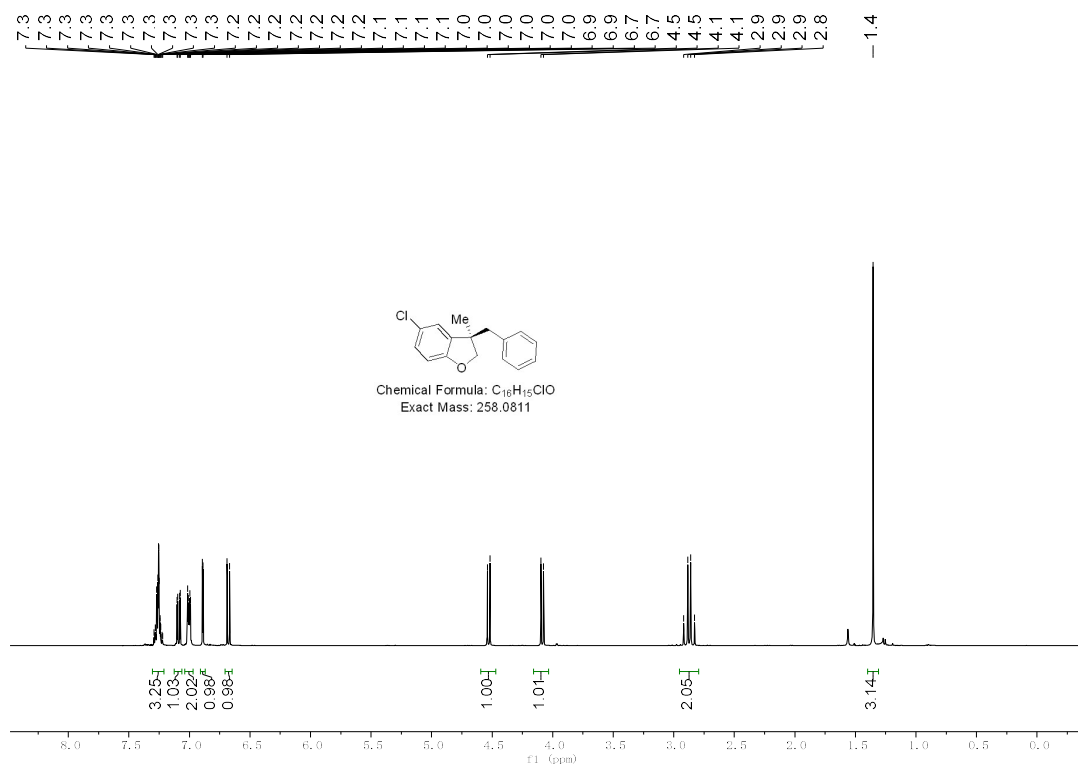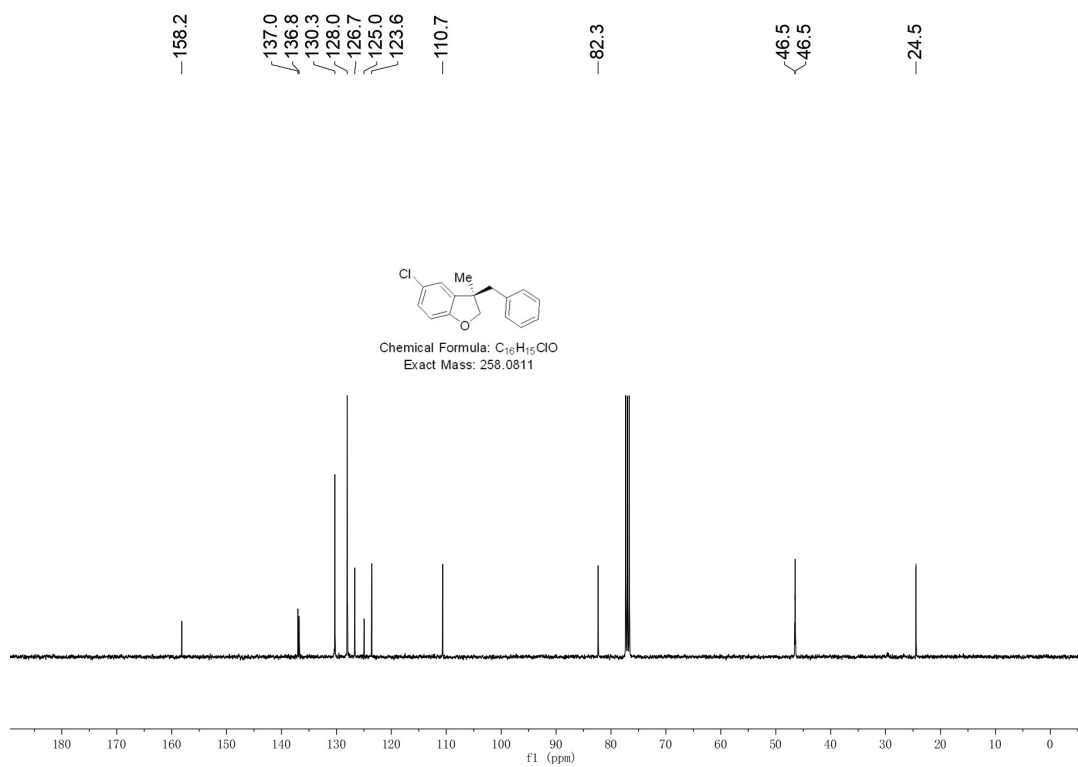



3ea

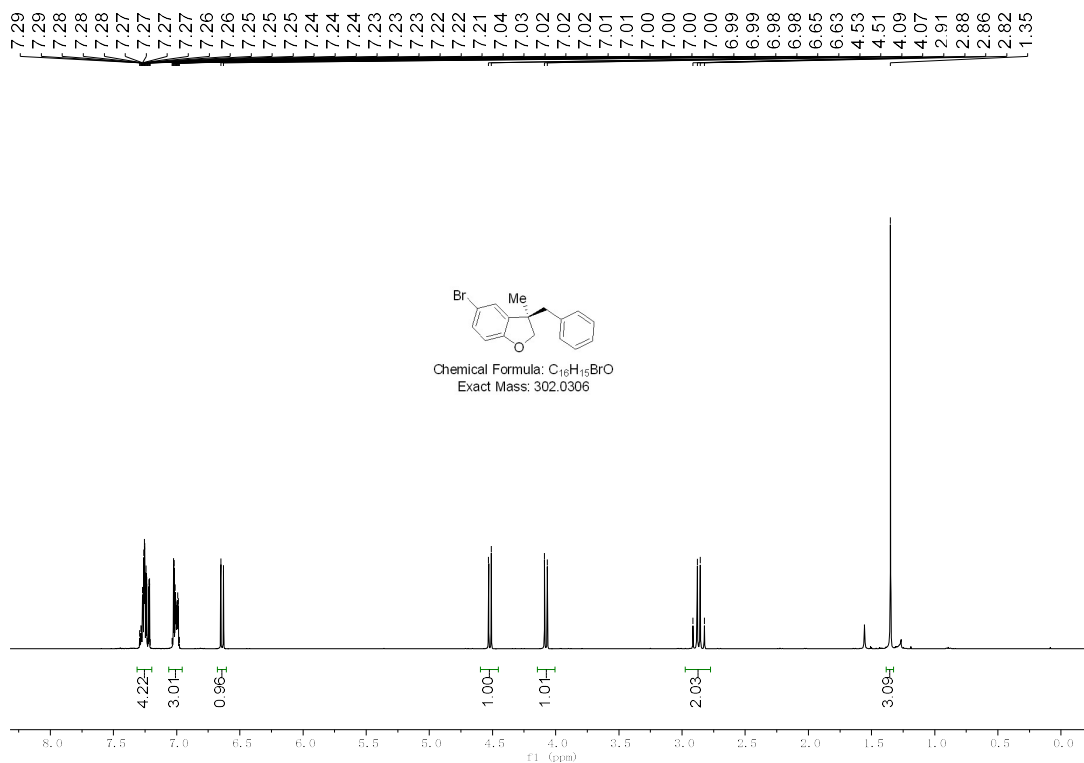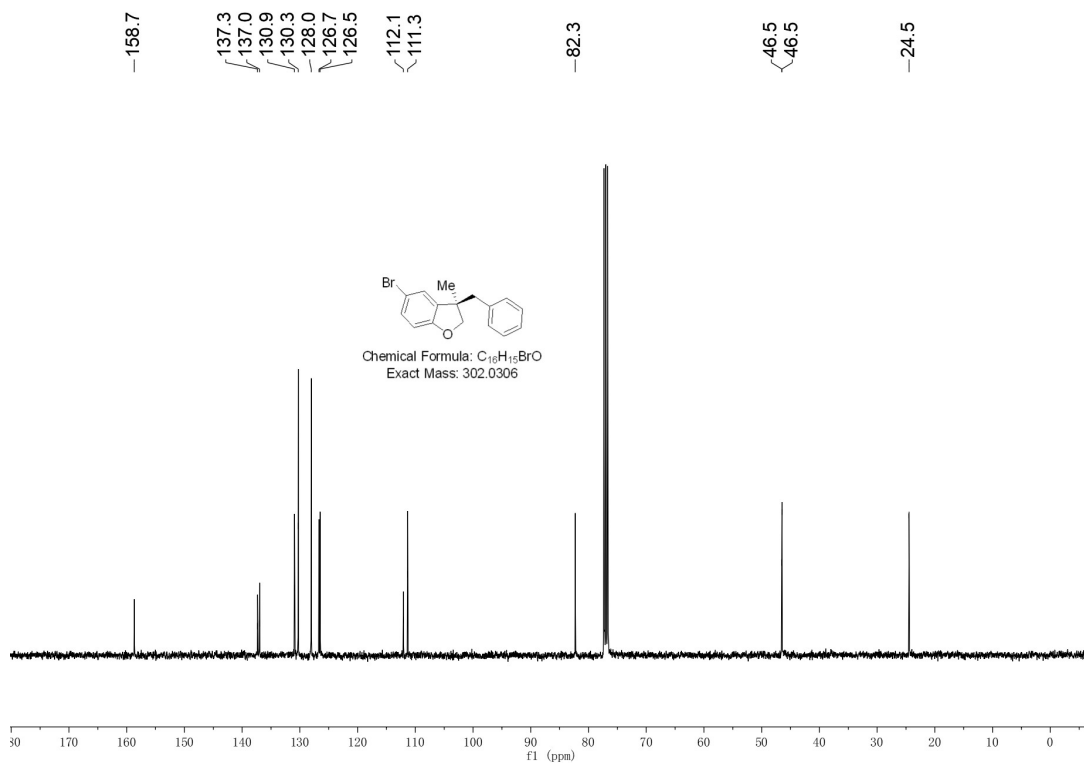

# 3fa

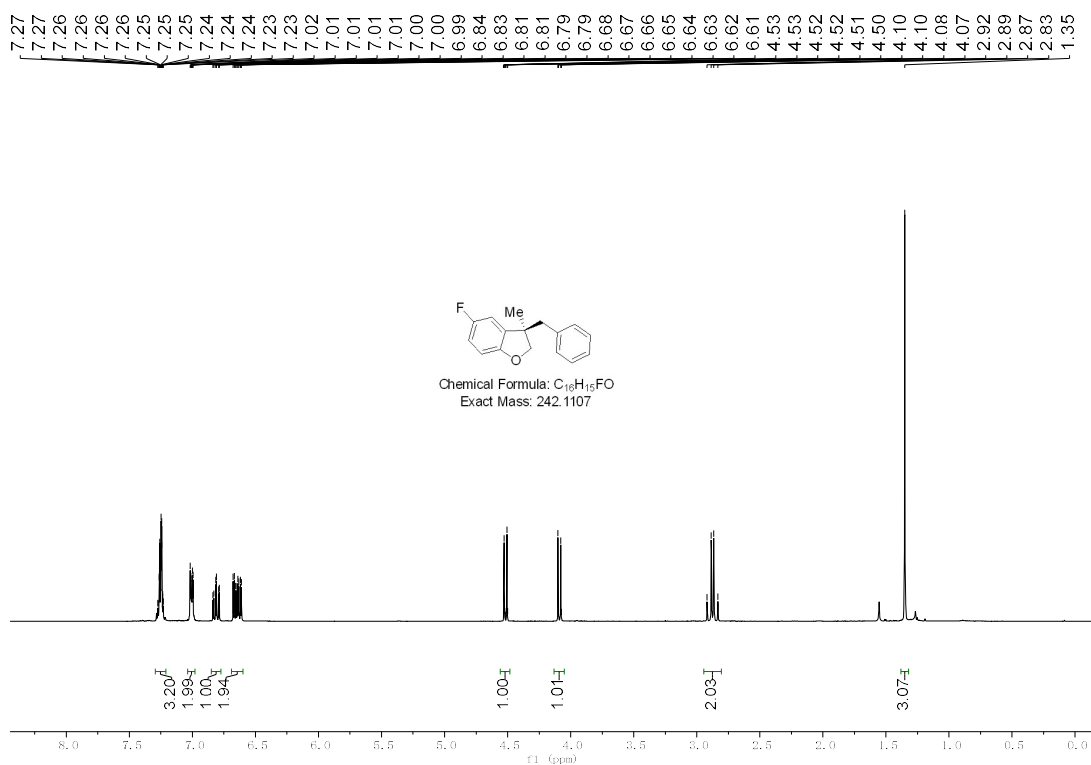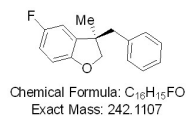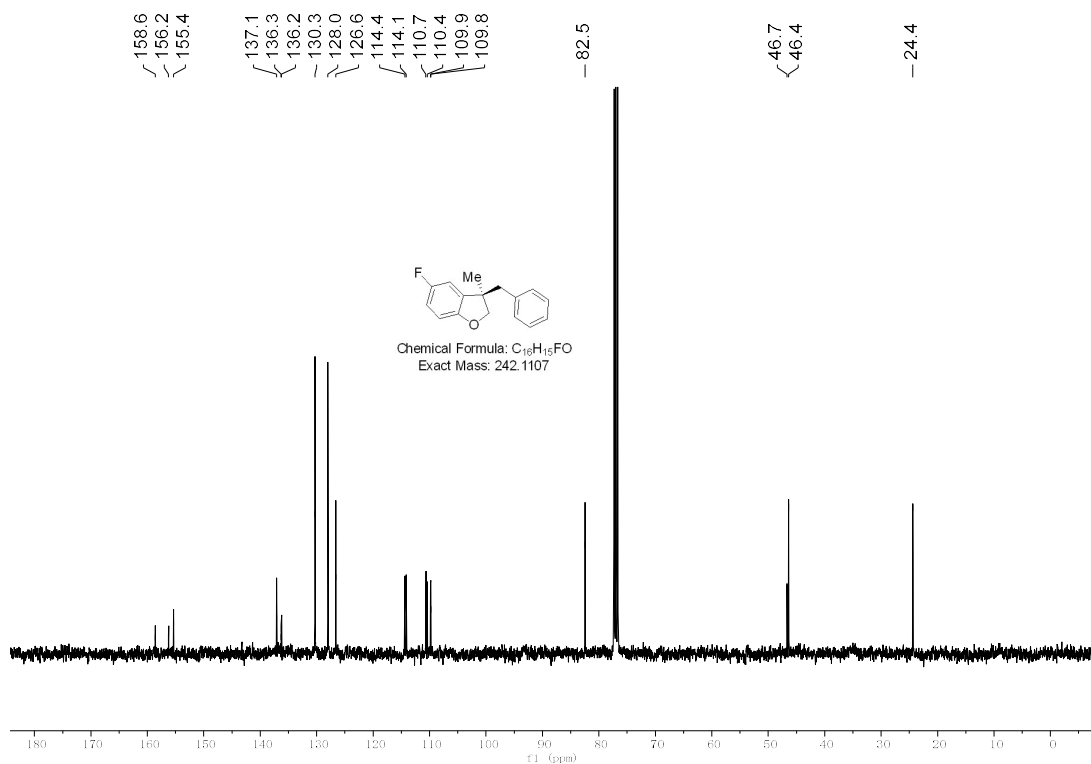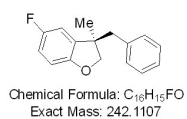

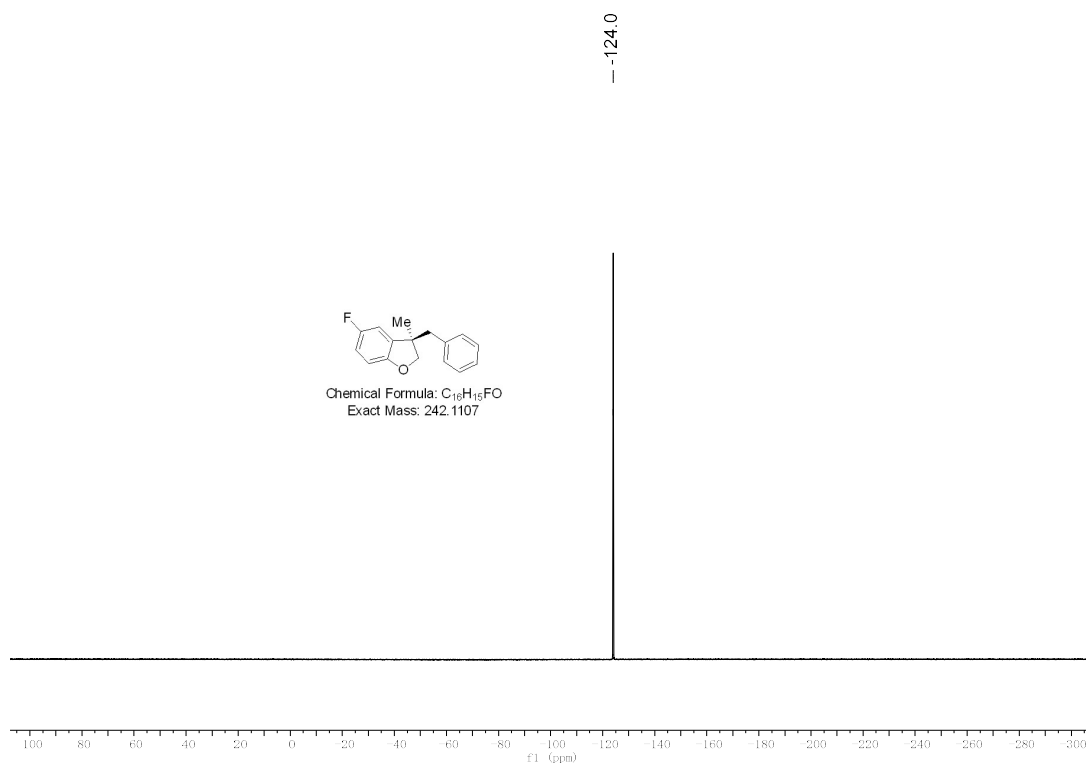

# 3ga

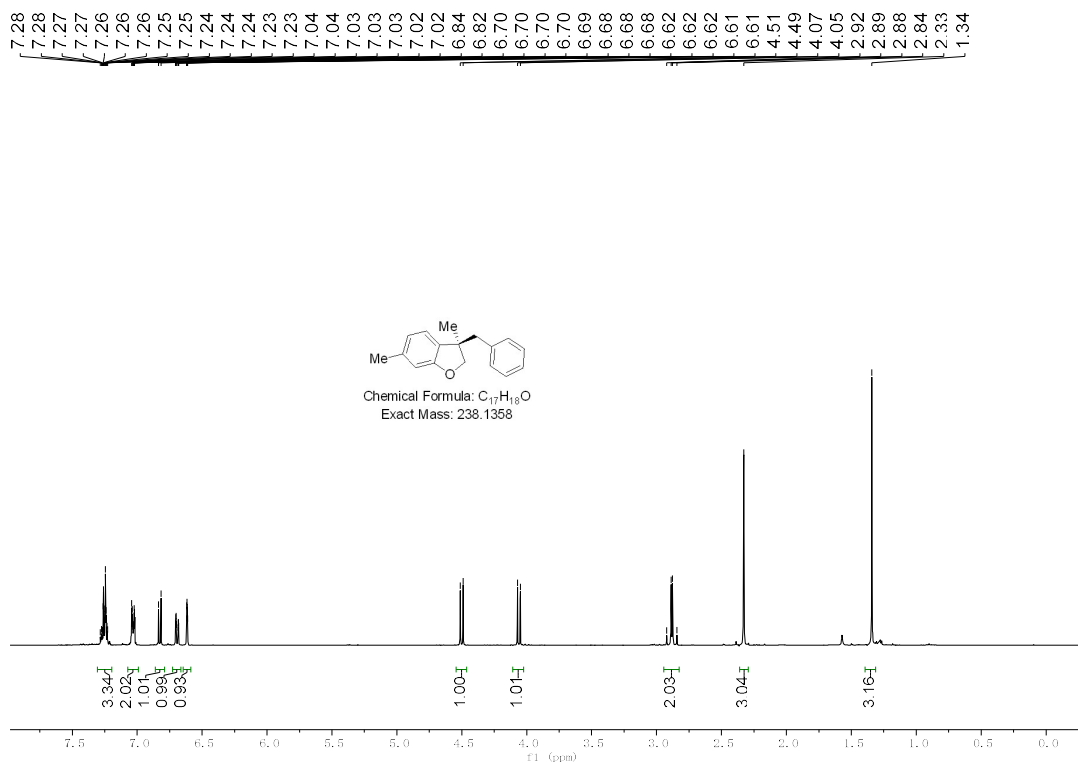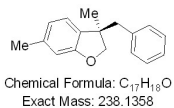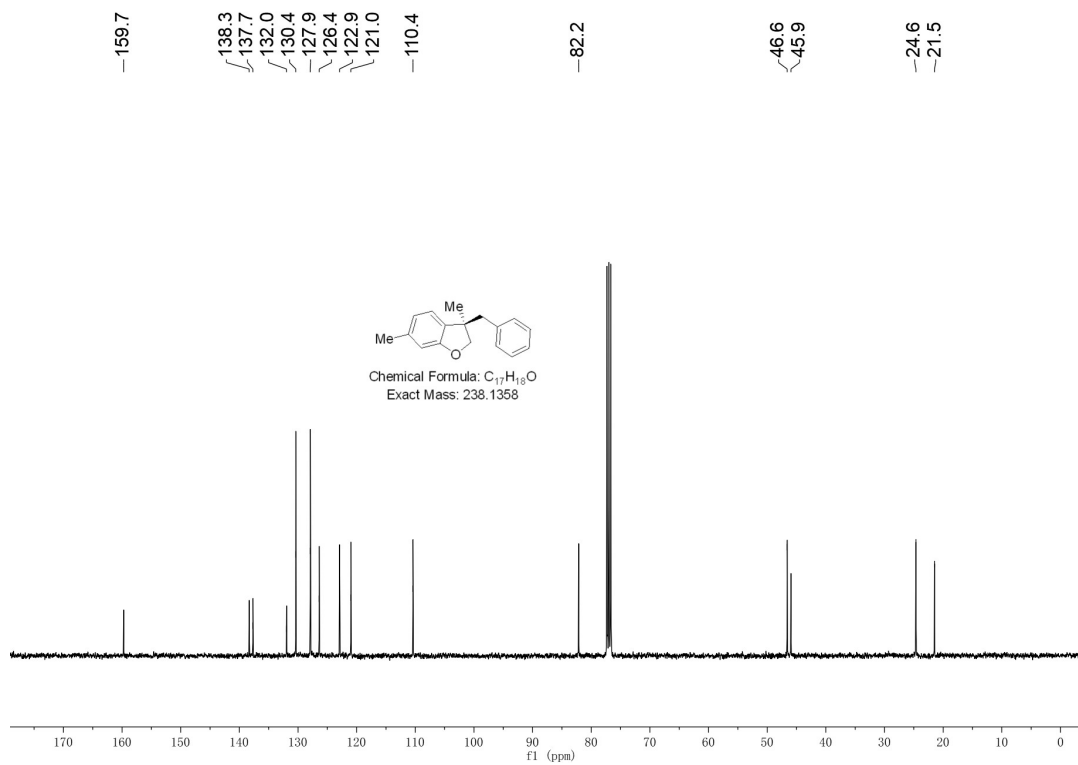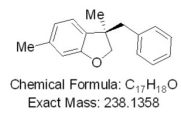

# 3ha

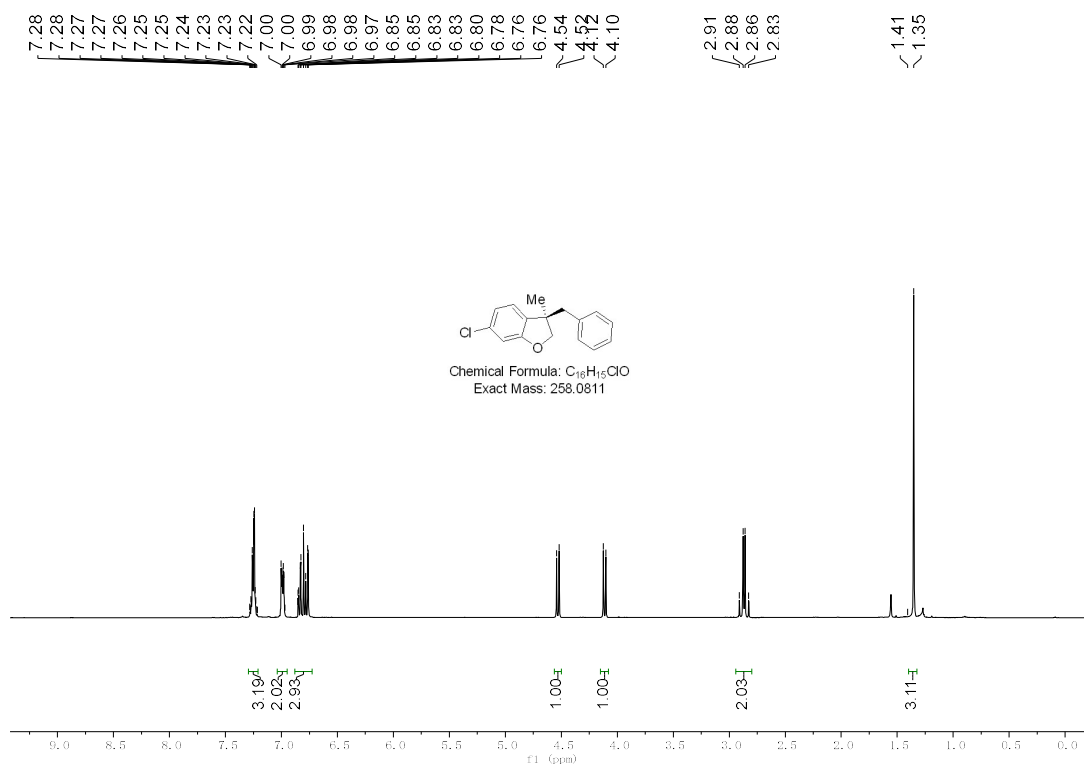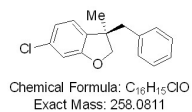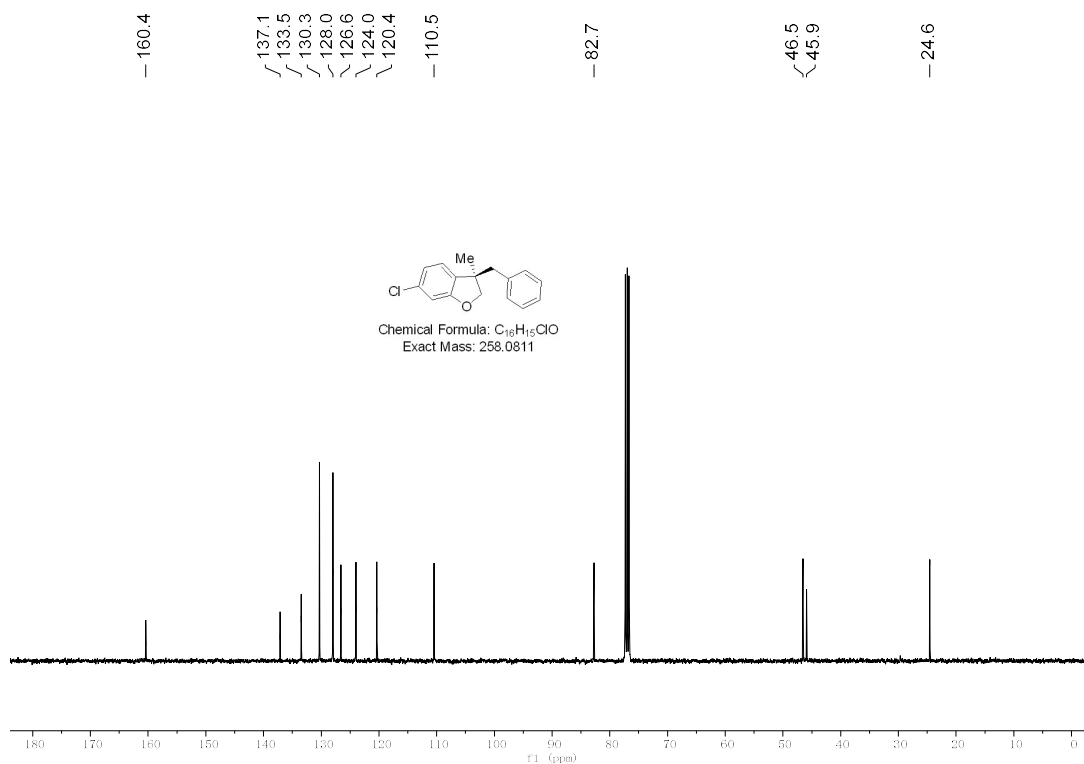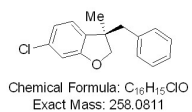

4aa

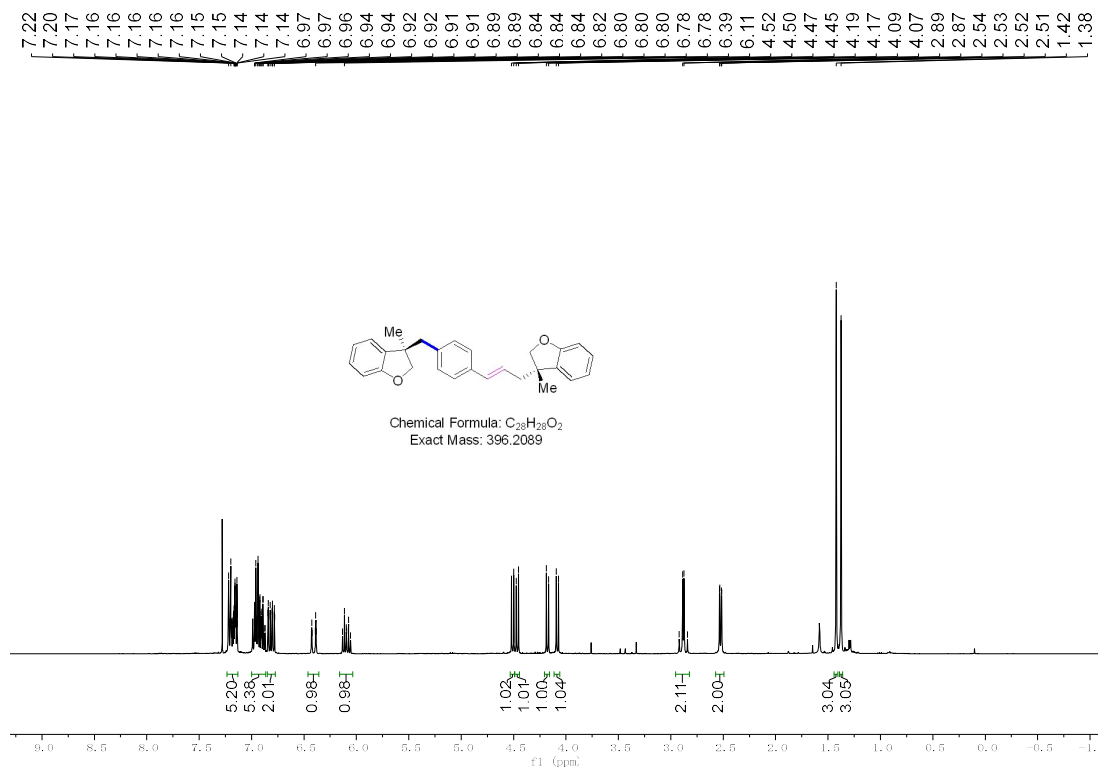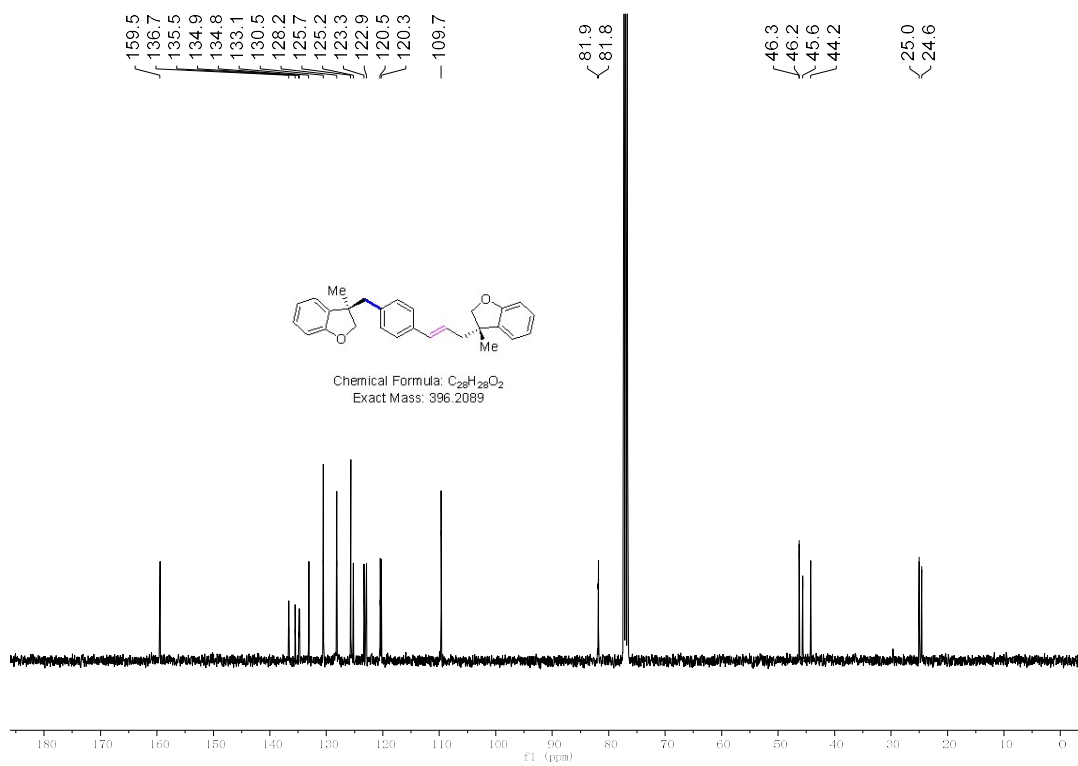

4ah

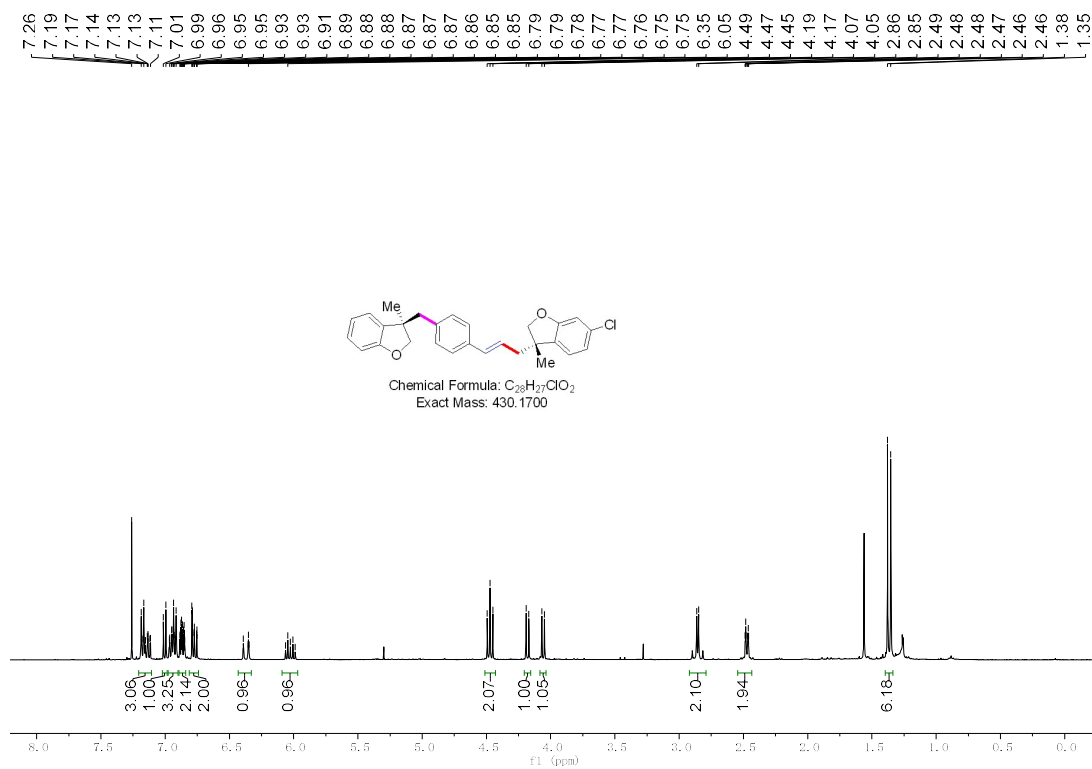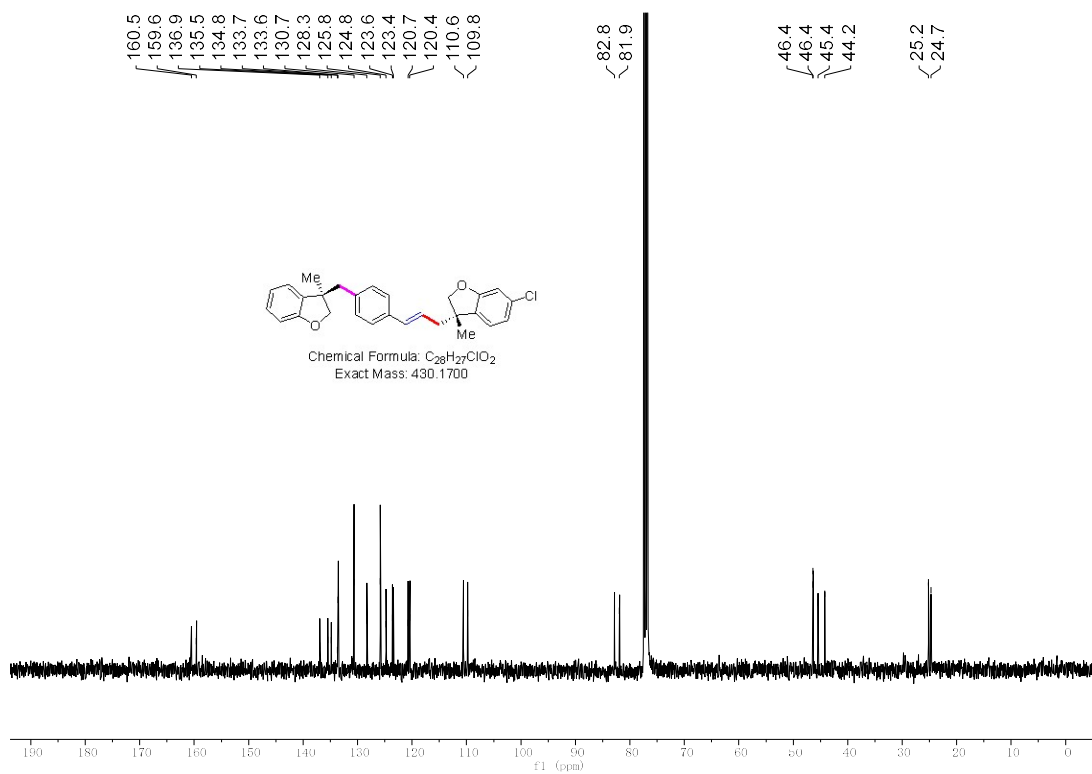

## 6. References

- [1] (a) You, W. and Brown, M. K., *J. Am. Chem. Soc.*, 2015, **137**, 14578. (b) Zhang, Z., Xu, B., Qian, Y., Wu, L., Wu, Y., Zhou, L., Liu, Y. and Zhang, J., *Angew. Chem. Int. Ed.*, 2018, **57**, 10373. (c) Carmona, R. C., Köster, O. D. and Correia, C. R. D., *Angew. Chem. Int. Ed.*, 2018, **57**, 12067.
- [2] Grigg, R., Sansano, J. M., Santhakumar, V., Sridharan, V., Thangavelanthum, R., Thornton-Pett, M. and Wilson, D., *Tetrahedron*, 1997, **53**, 11803.
